# Supplementary material for: Prediction of human drug-induced liver injury (DILI) in relation to oral doses and blood concentrations
Source: Springer Nature journal article supplement (doi:10.1007/s00204-019-02492-9), 2019-06-01

Acetaminophen  
Experiment 1

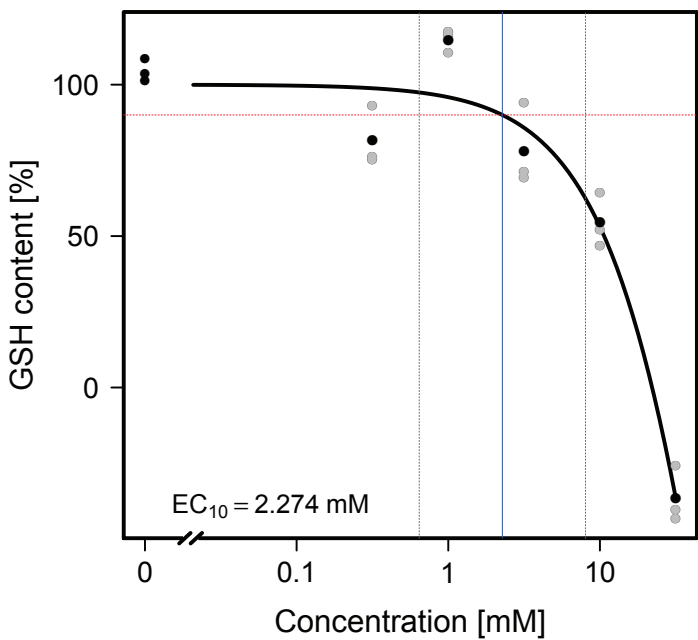

Acetaminophen  
Experiment 2

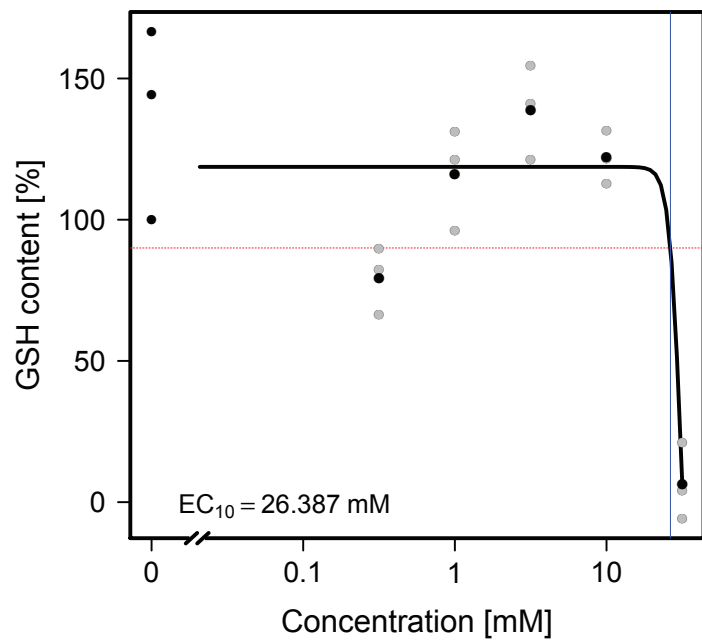

Acetaminophen  
Experiment 3

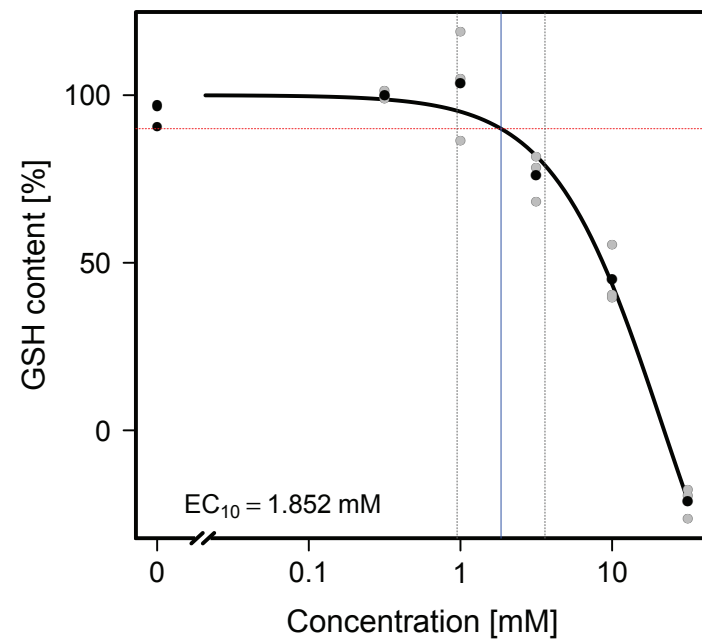

**Aspirin**  
Experiment 1

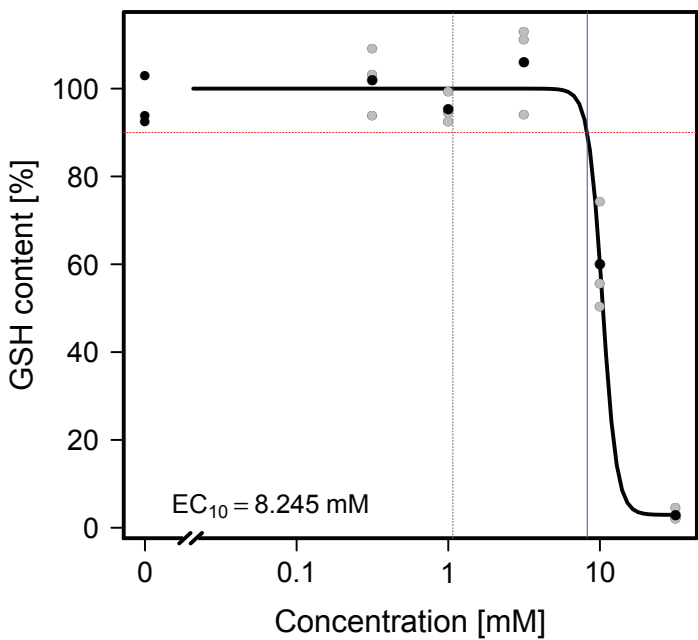

**Aspirin**  
Experiment 2

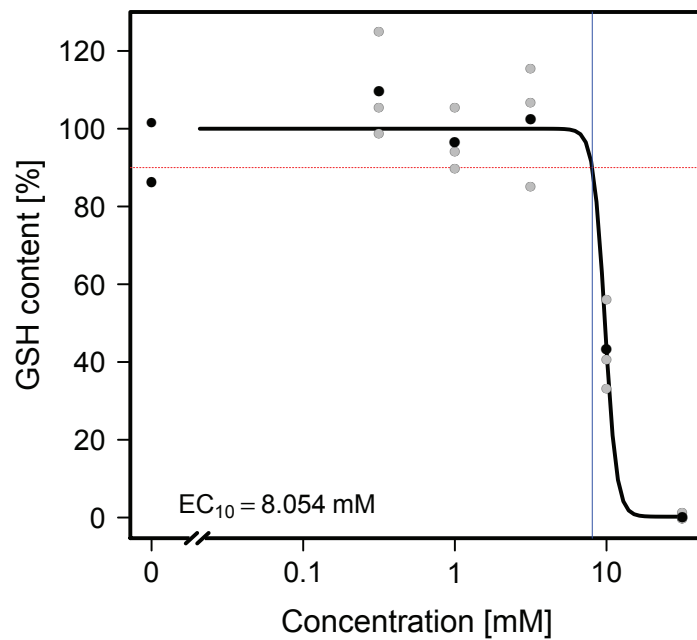

**Aspirin**  
Experiment 3

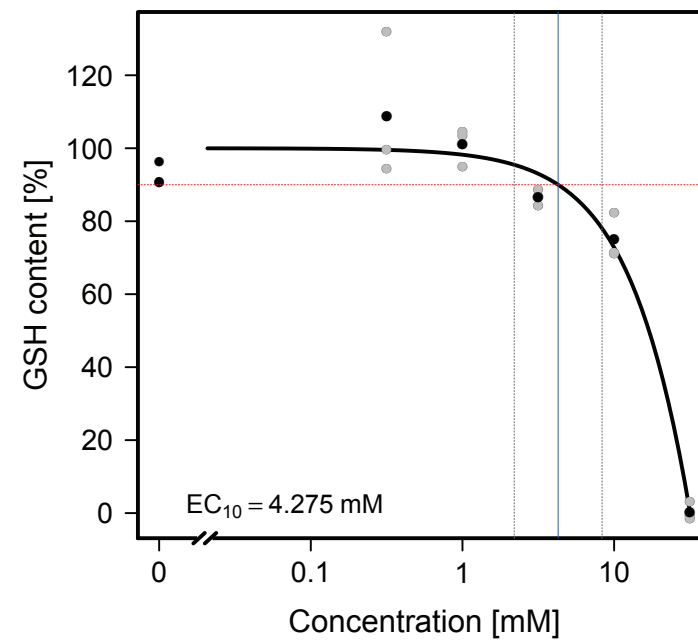

**Buspirone**  
Experiment 1

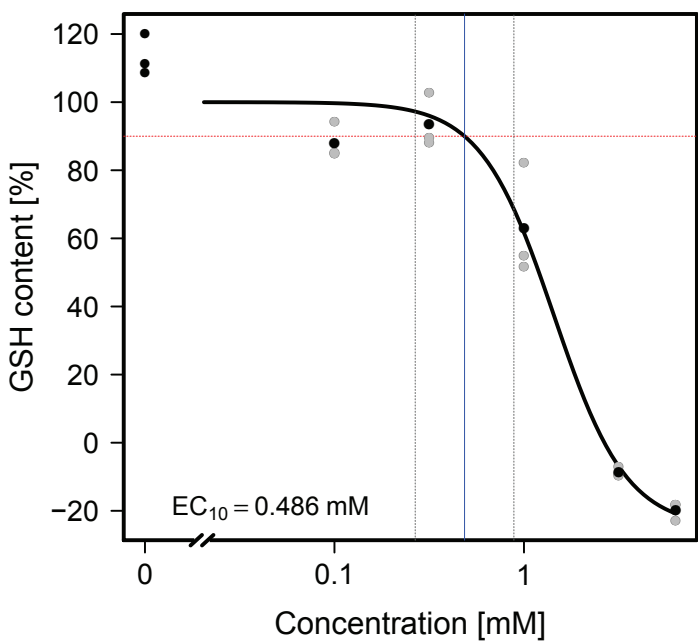

**Buspirone**  
Experiment 2

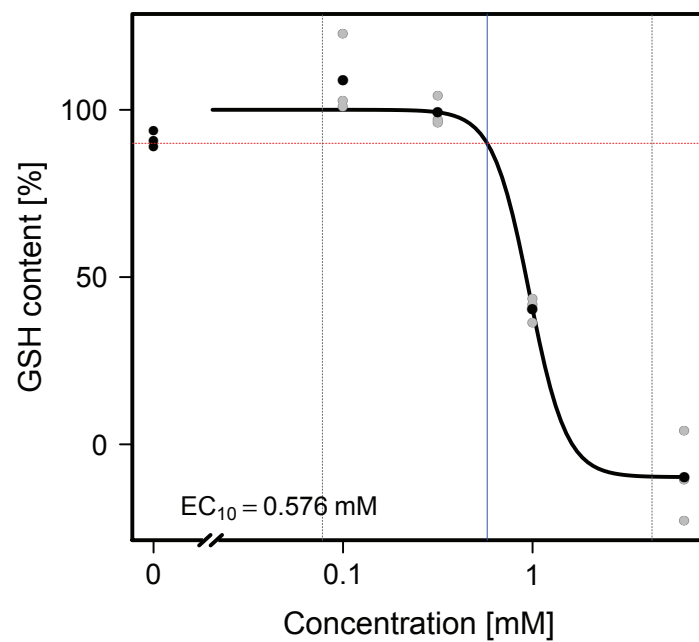

**Buspirone**  
Experiment 3

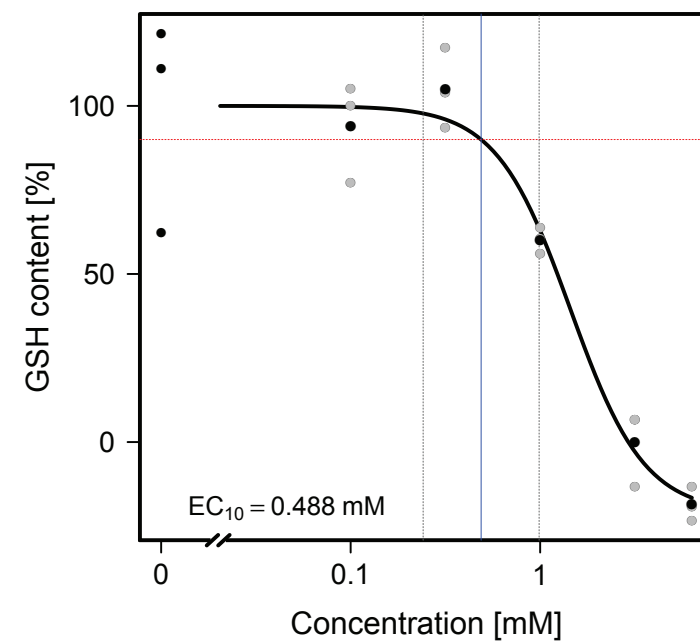

**Carbamazepine**  
Experiment 1

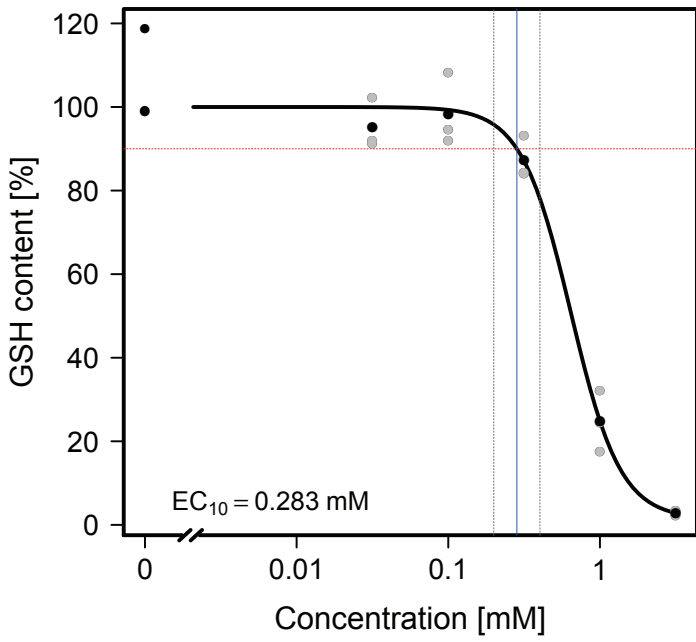

**Carbamazepine**  
Experiment 2

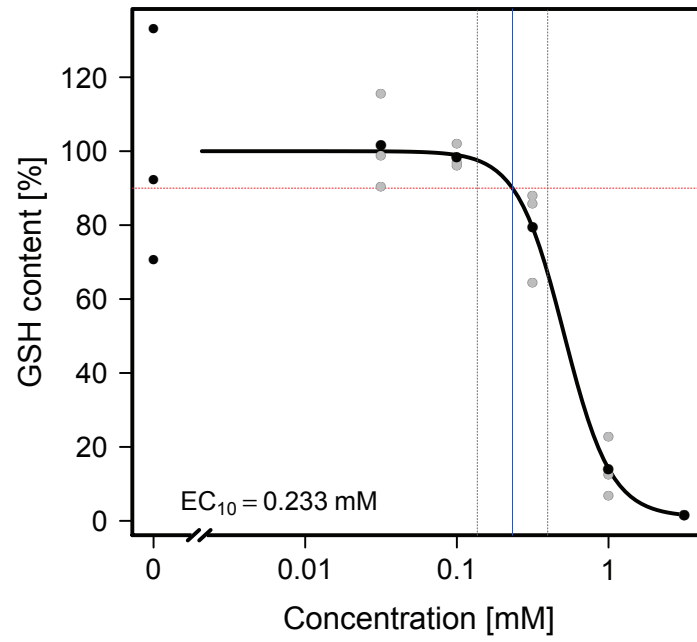

**Carbamazepine**  
Experiment 3

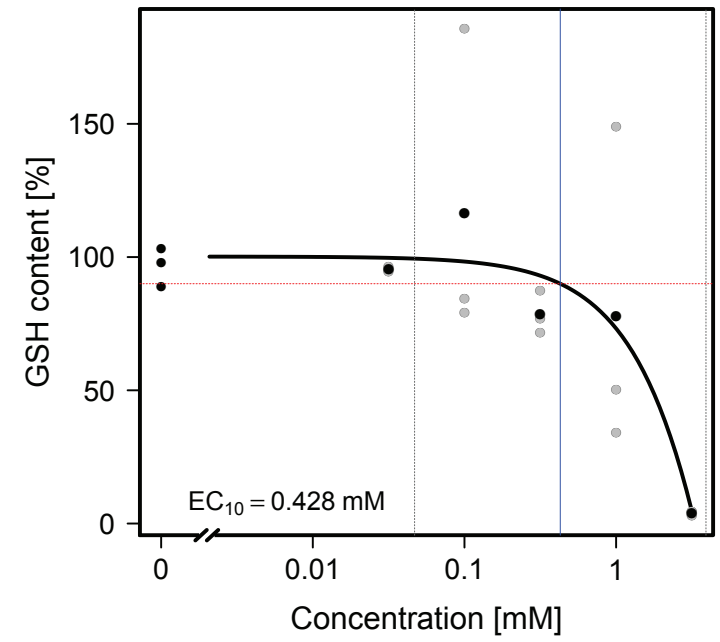

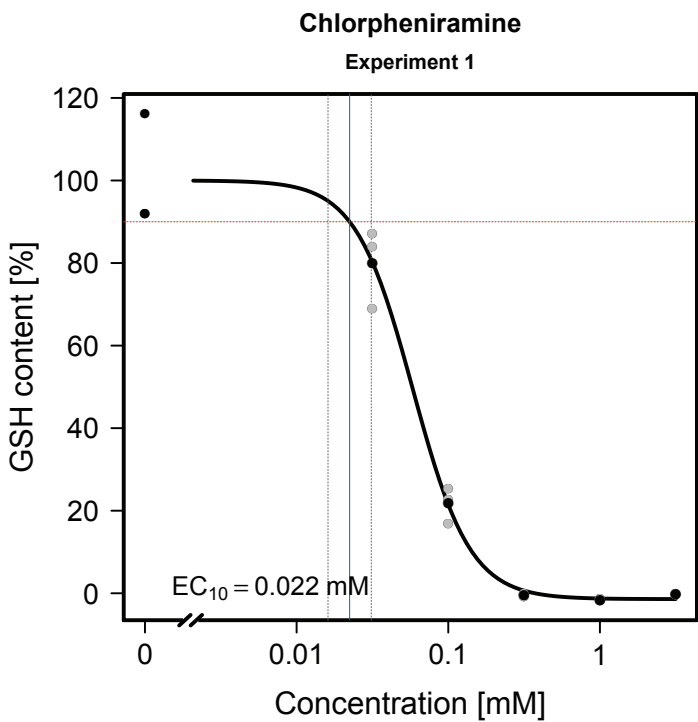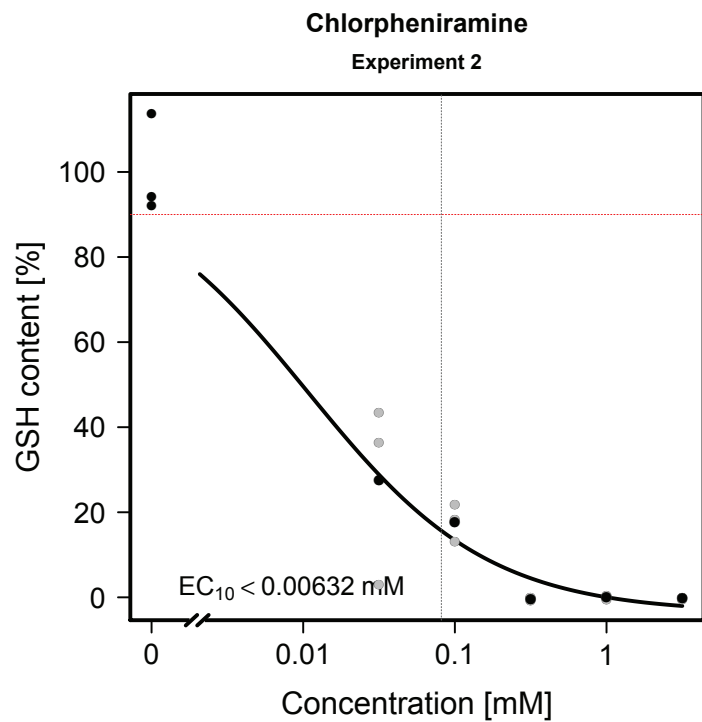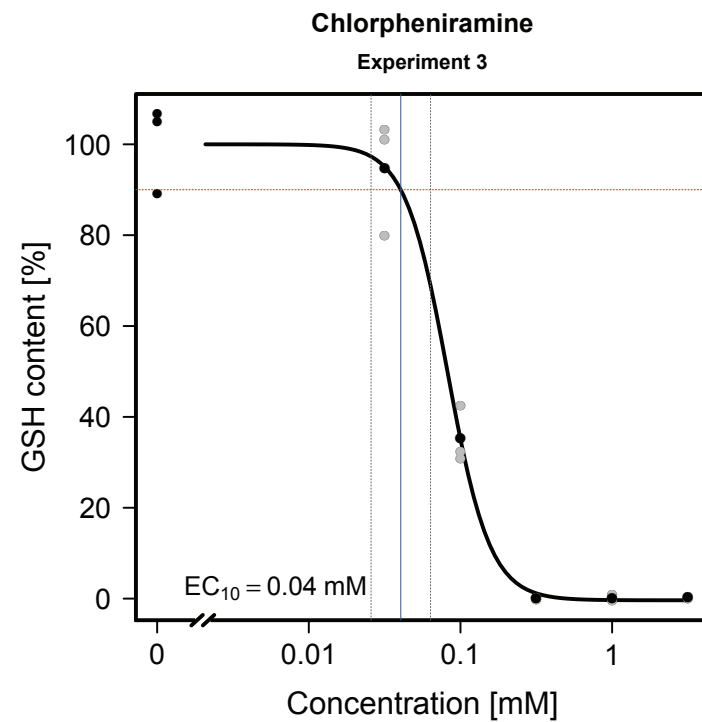

**Clonidine**  
Experiment 1

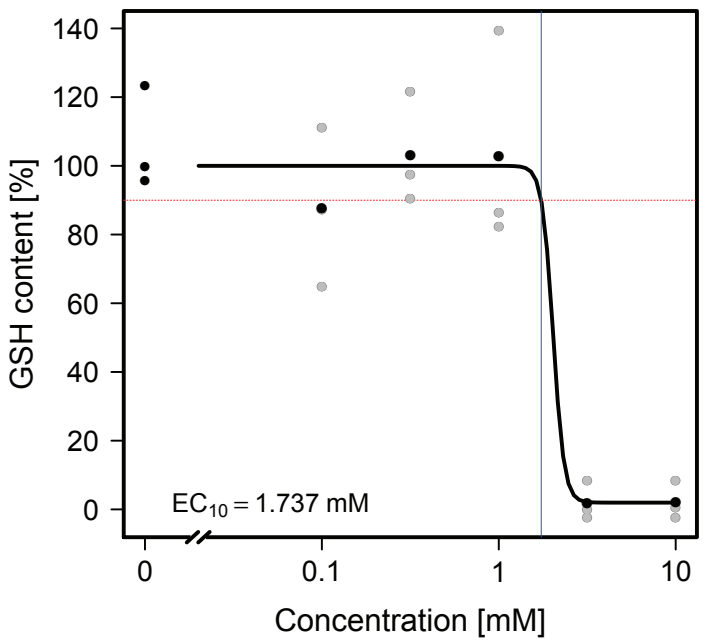

**Clonidine**  
Experiment 2

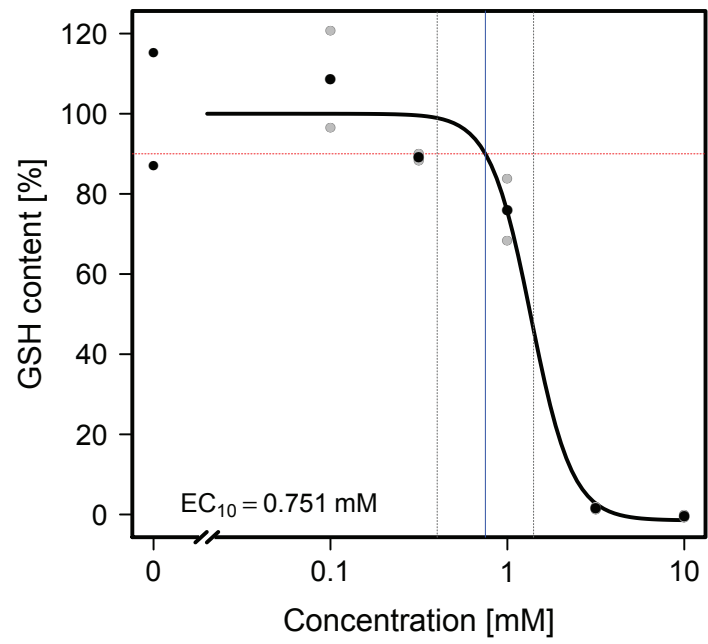

**Clonidine**  
Experiment 3

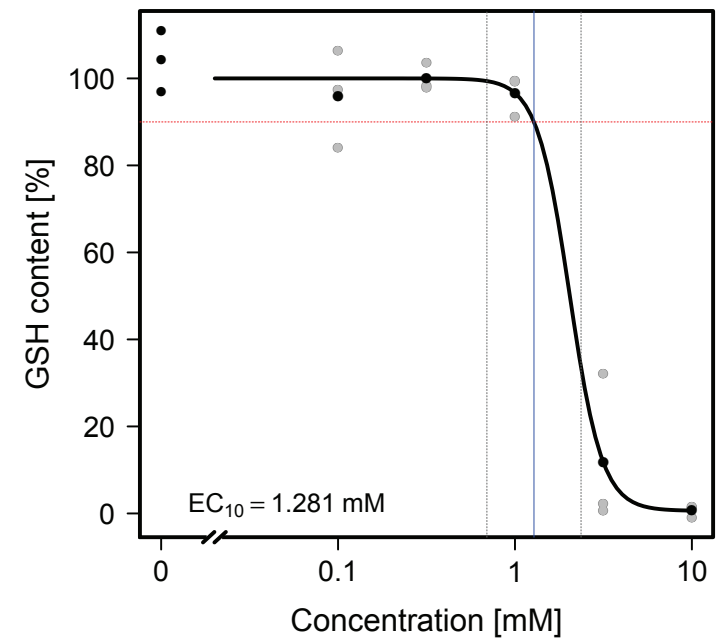

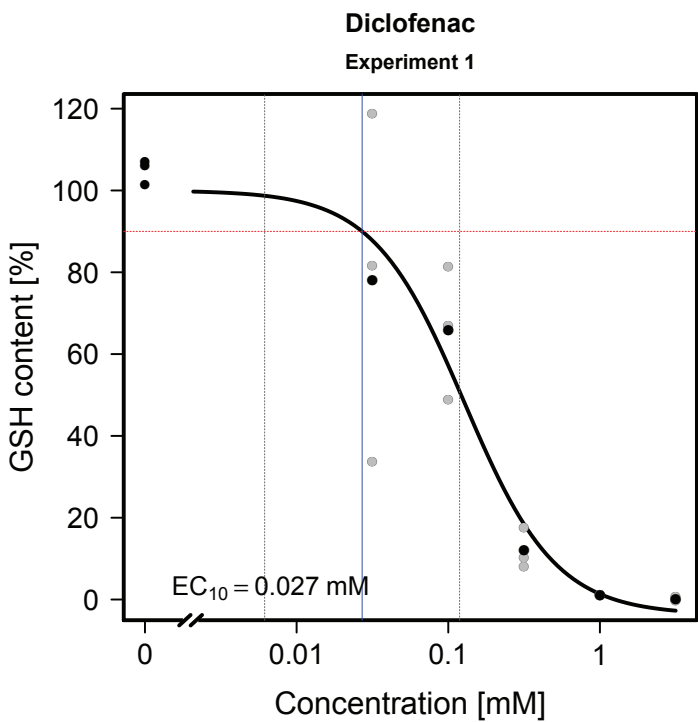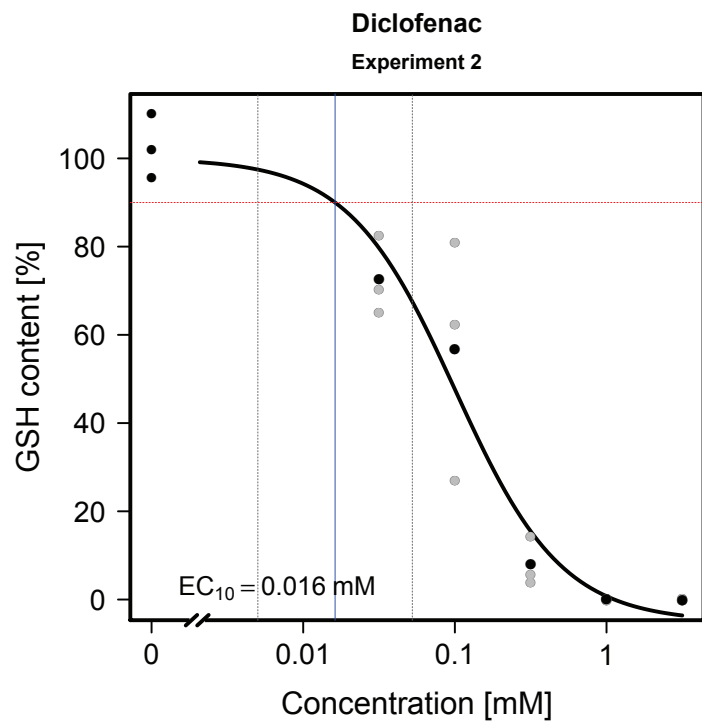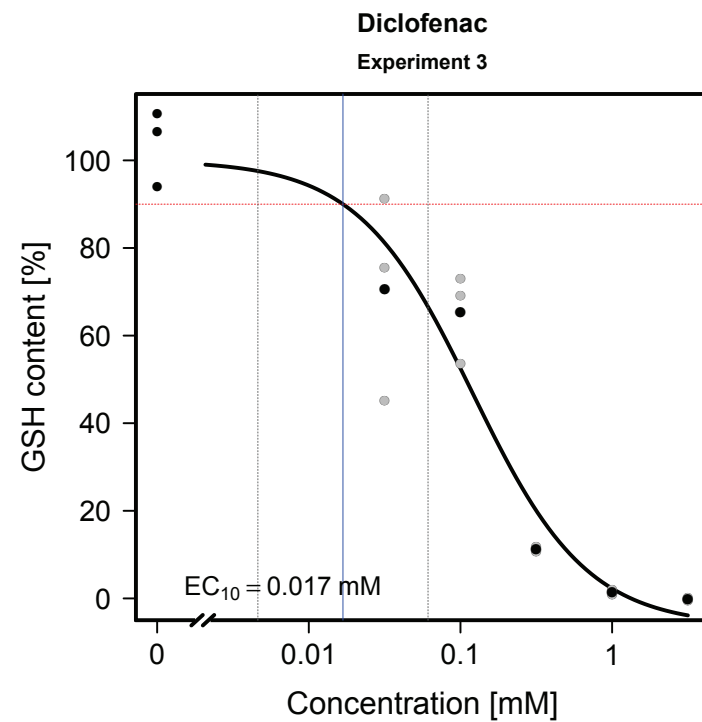

### Dimethylsulfoxide

#### Experiment 1

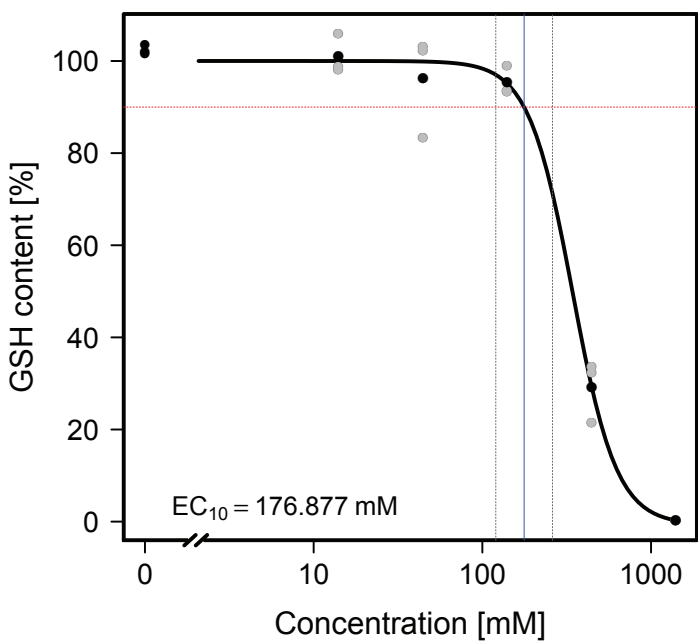

### Dimethylsulfoxide

#### Experiment 2

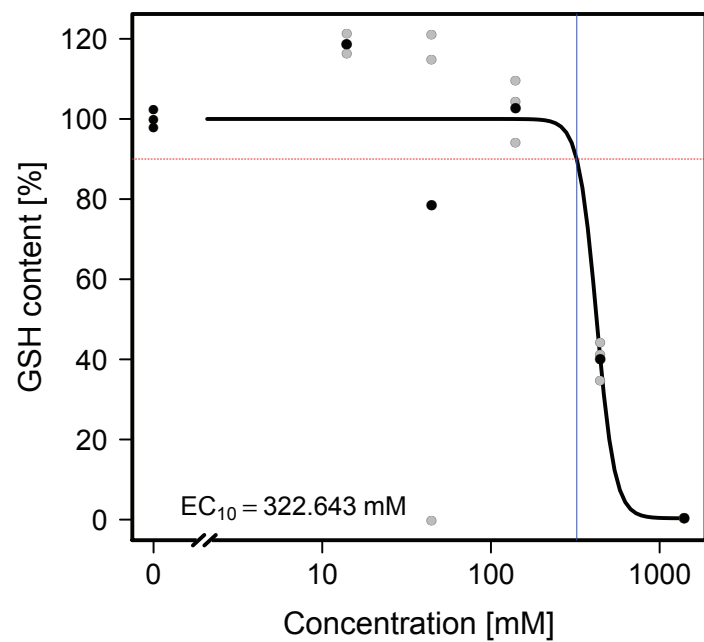

### Dimethylsulfoxide

#### Experiment 3

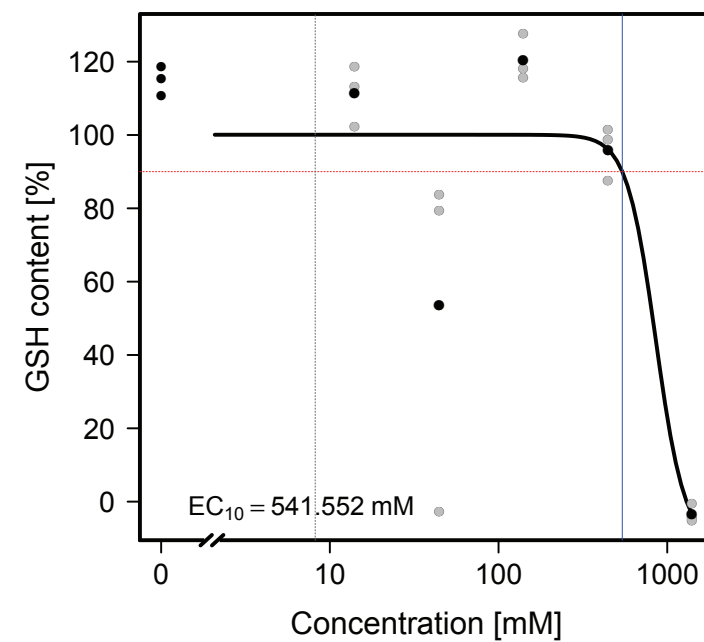

**Ethanol**  
Experiment 1

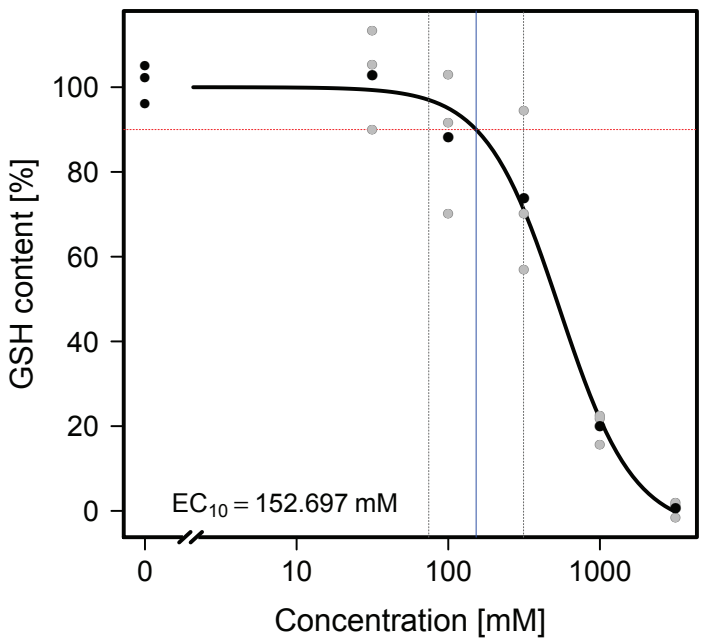

**Ethanol**  
Experiment 2

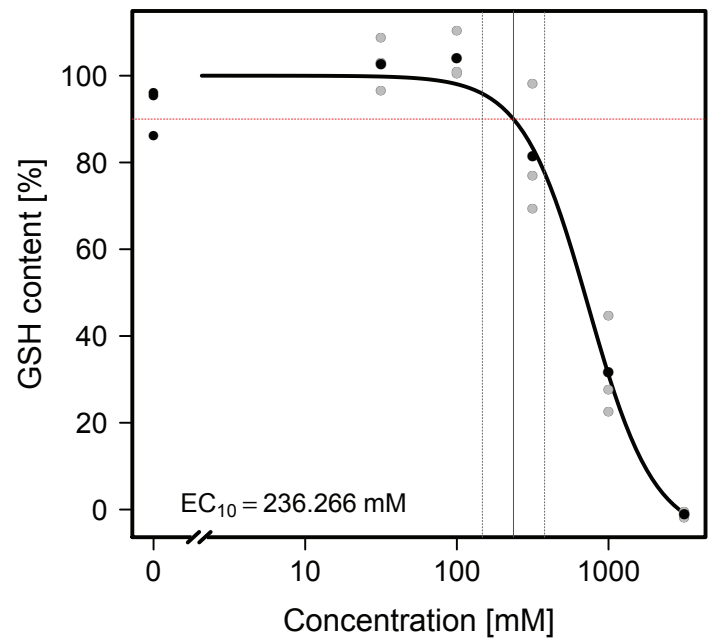

**Ethanol**  
Experiment 3

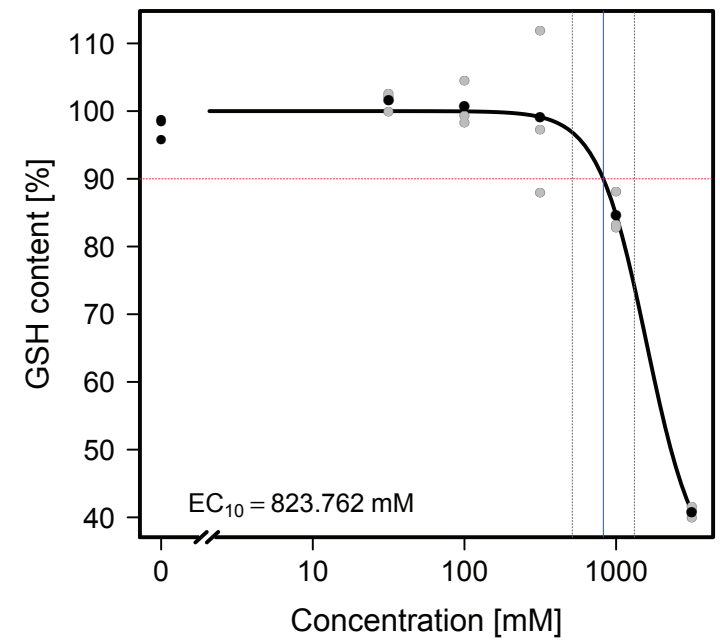

**Famotidine**  
Experiment 1

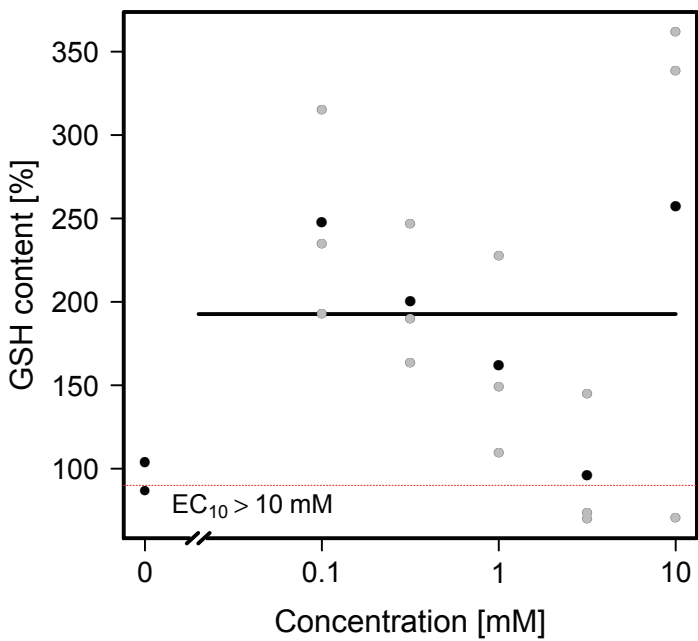

**Famotidine**  
Experiment 2

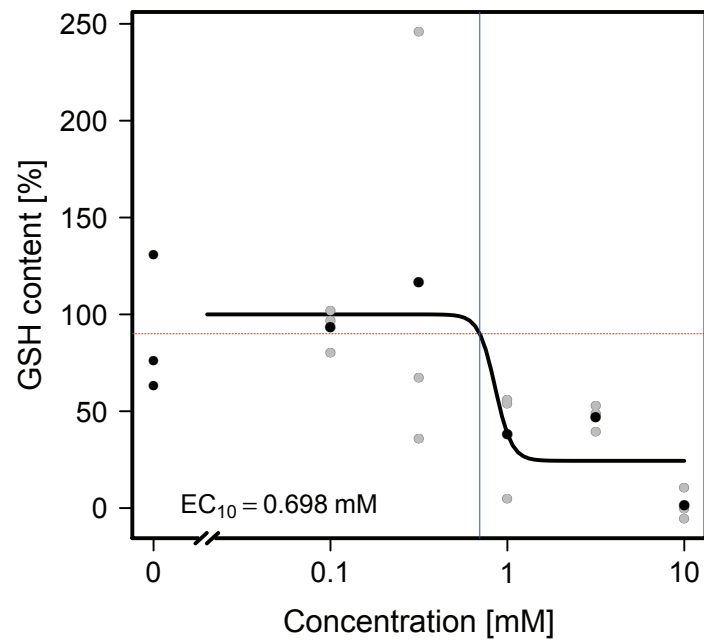

**Famotidine**  
Experiment 3

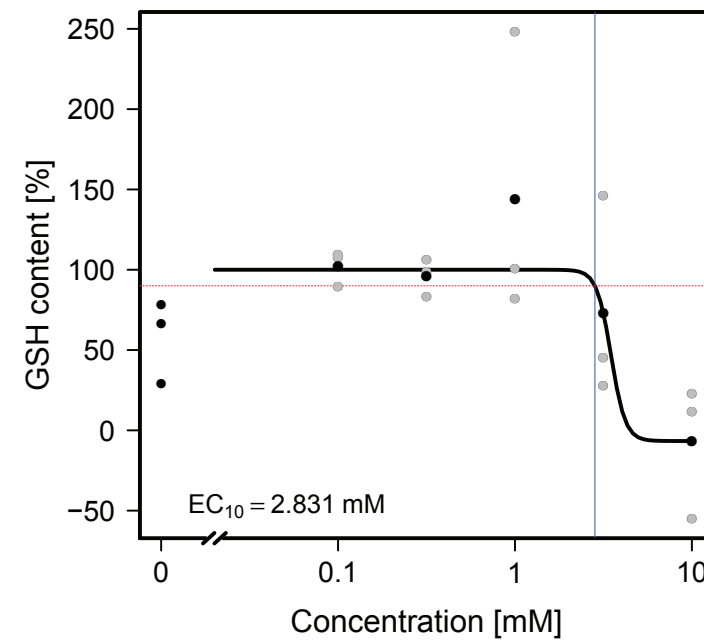

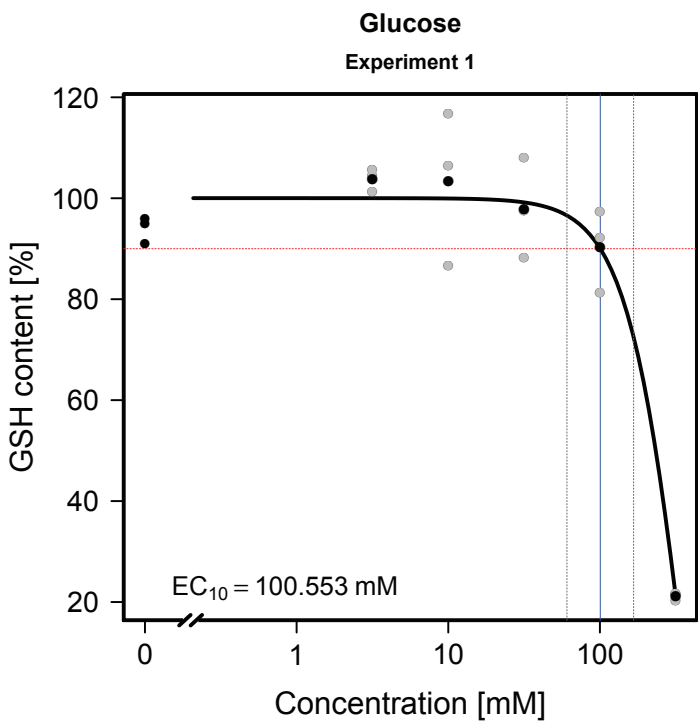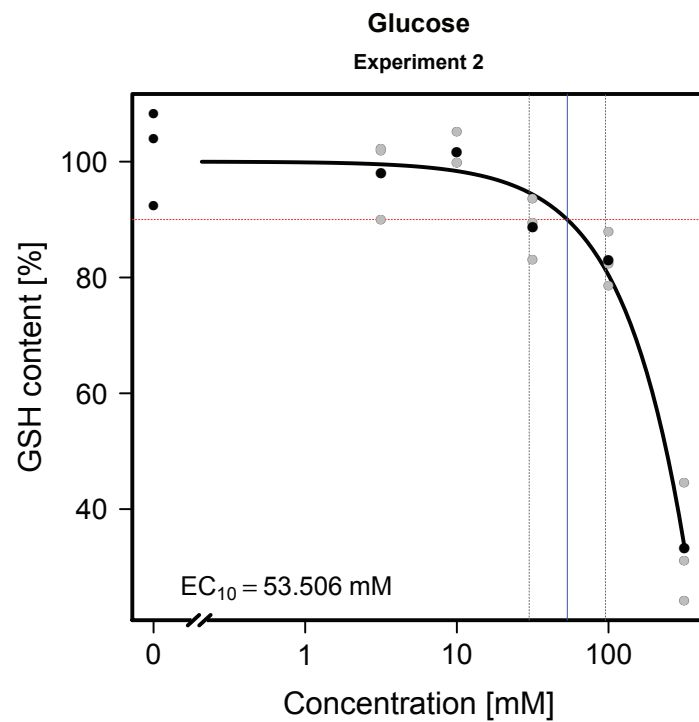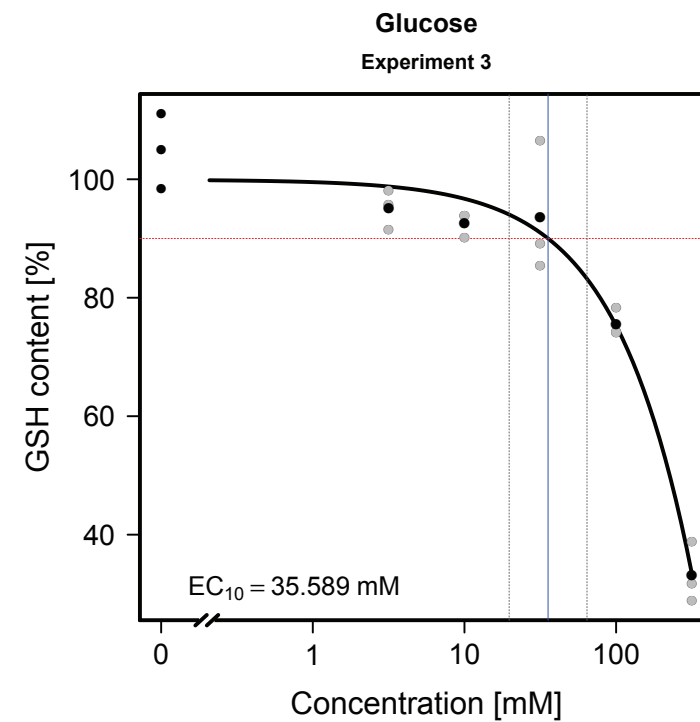

Hydroxyzine  
Experiment 1

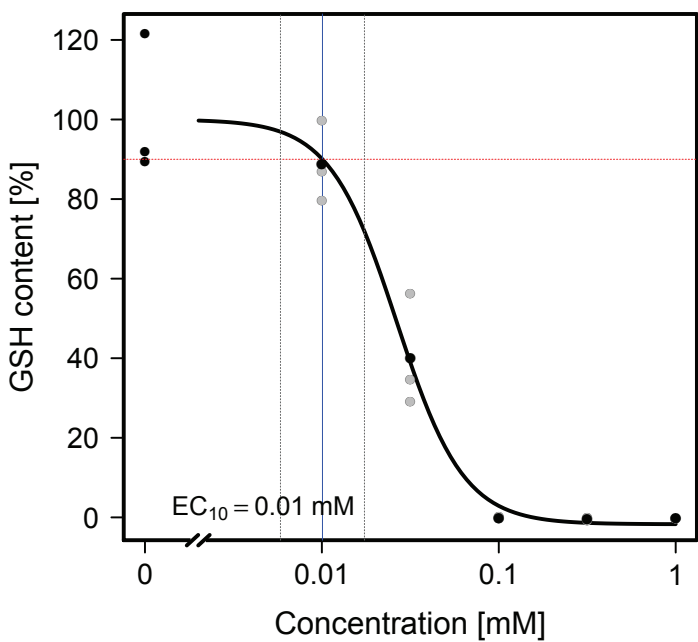

Hydroxyzine  
Experiment 2

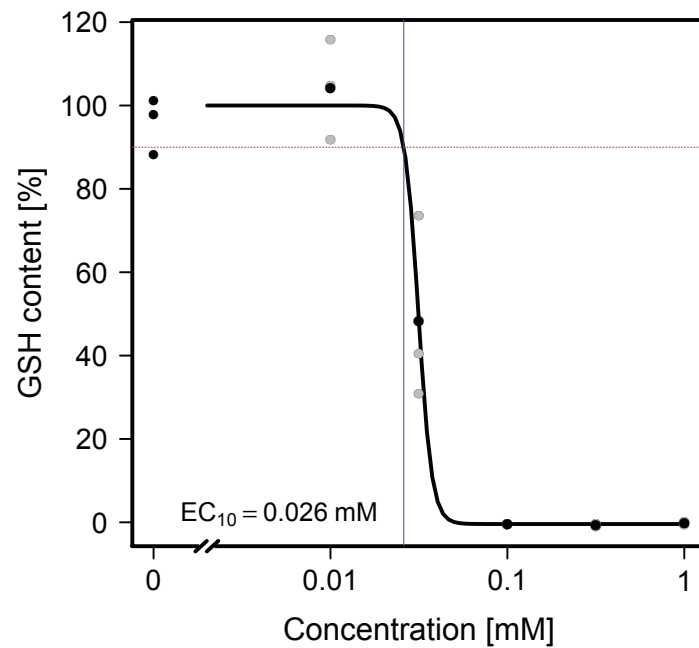

Hydroxyzine  
Experiment 3

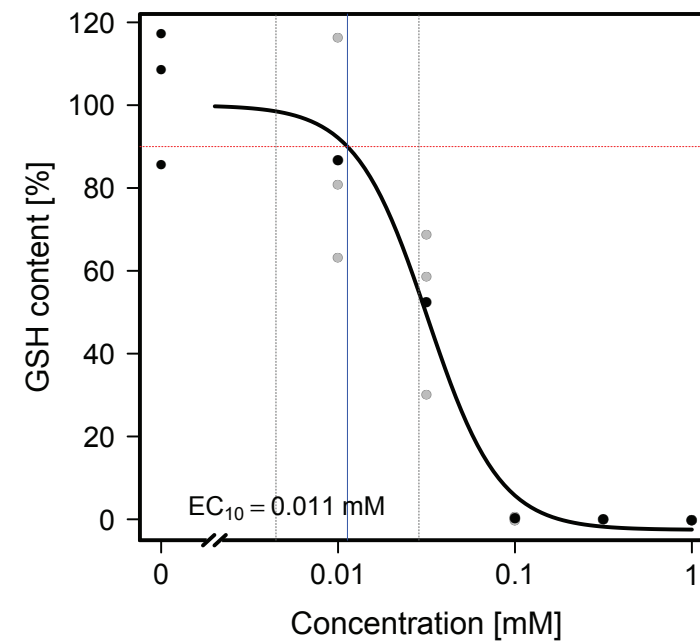

Isoniazid  
Experiment 1

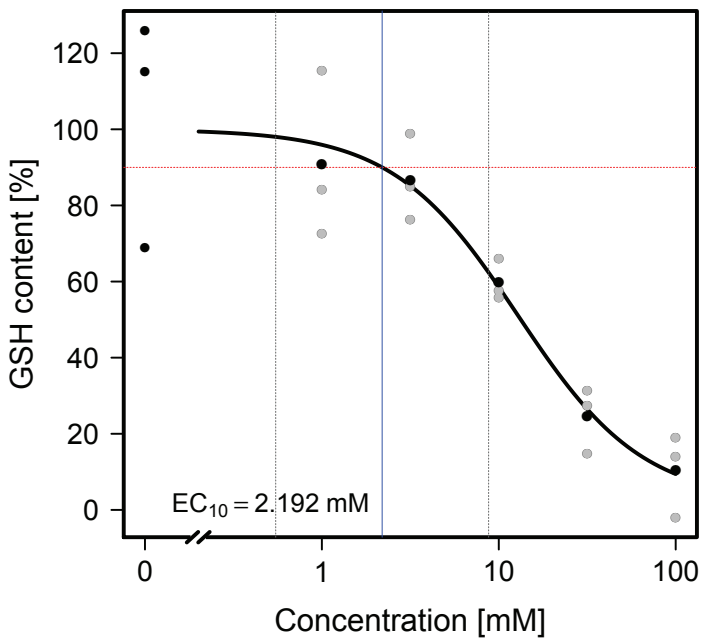

Isoniazid  
Experiment 2

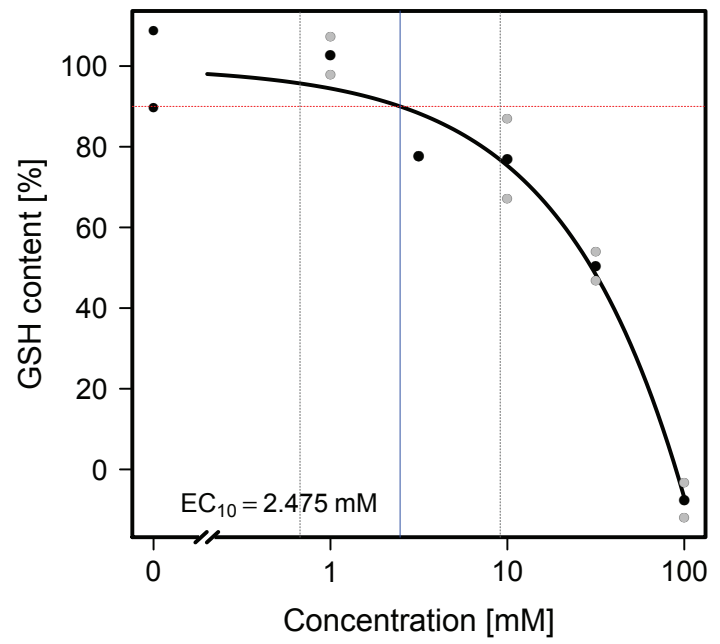

Isoniazid  
Experiment 3

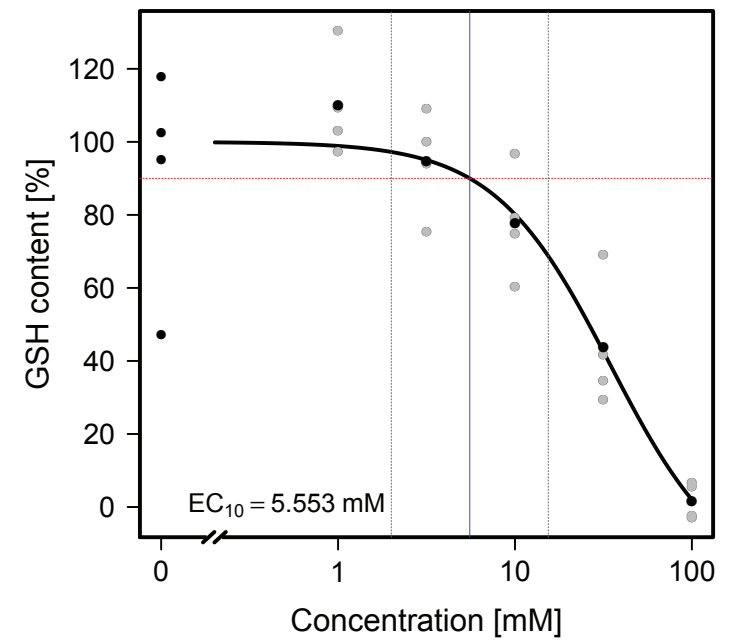

**Ketoconazole**  
Experiment 1

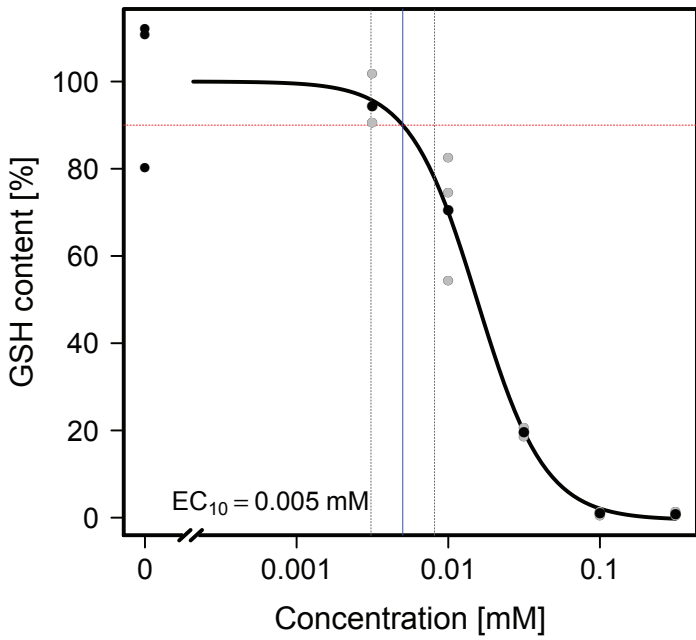

**Ketoconazole**  
Experiment 2

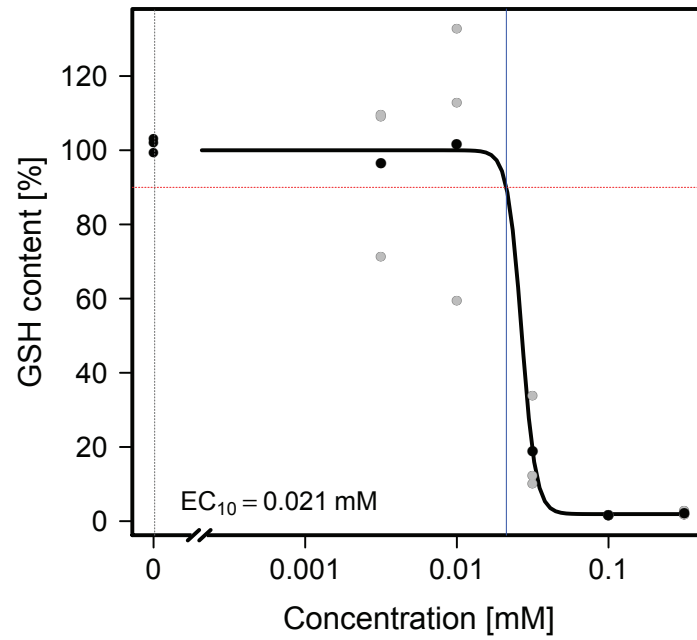

**Ketoconazole**  
Experiment 3

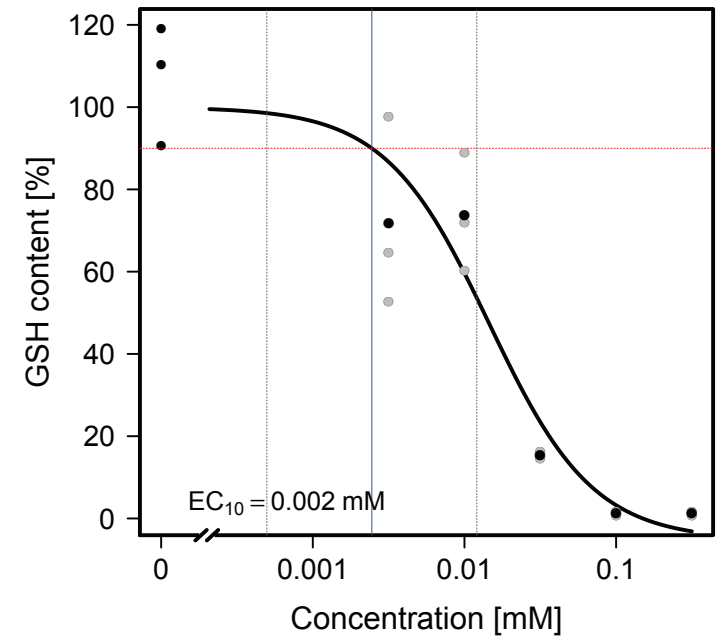

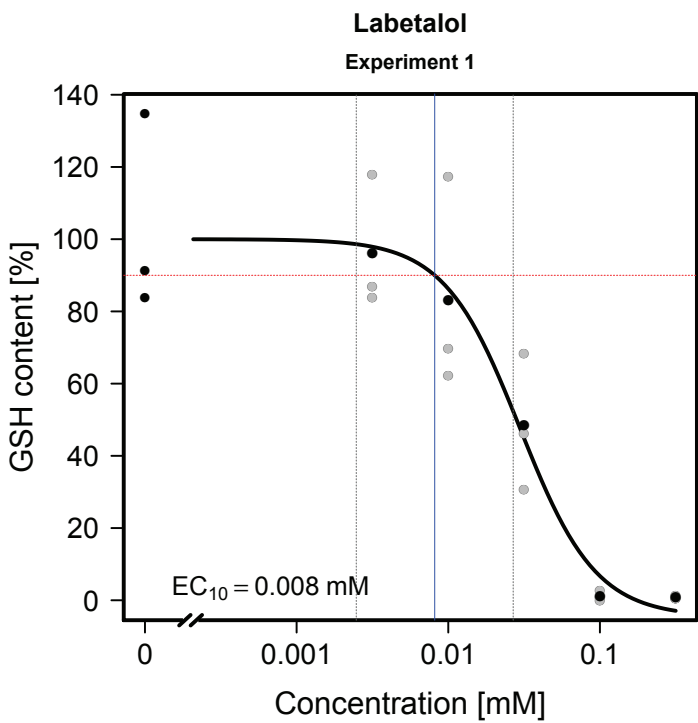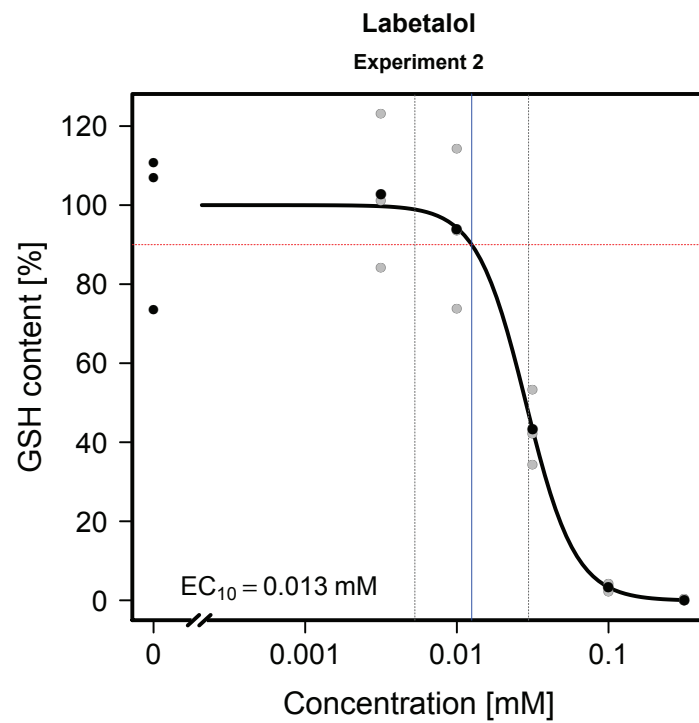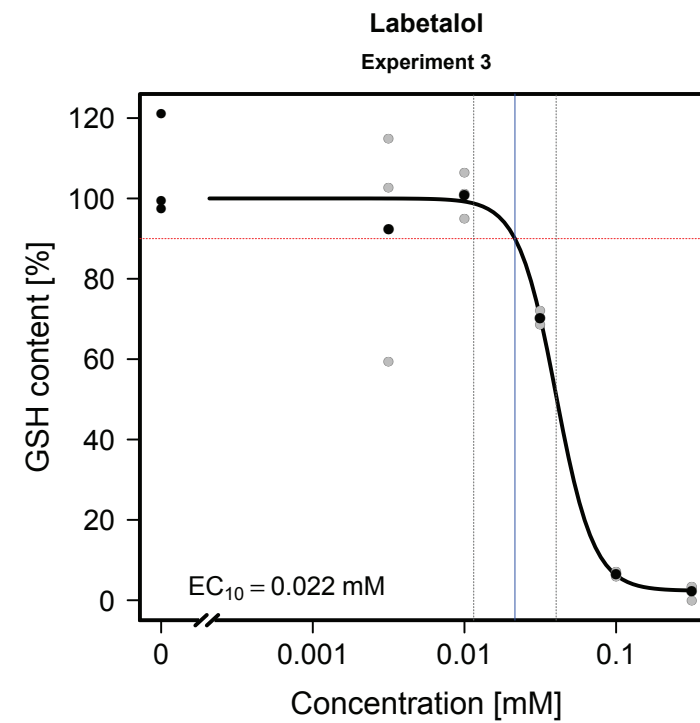

Levofloxacin  
Experiment 1

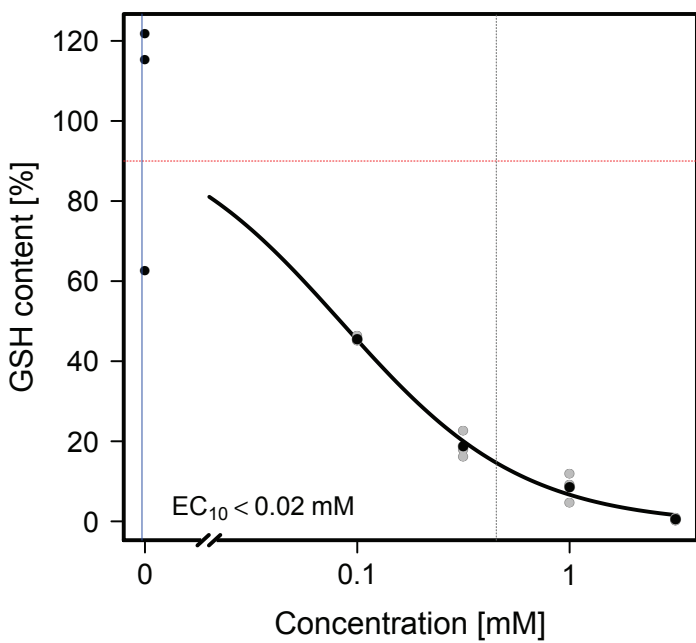

Levofloxacin  
Experiment 2

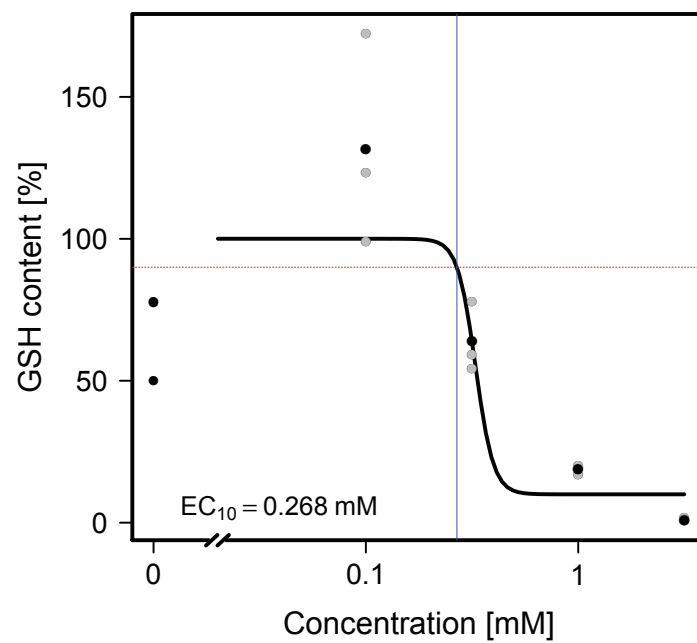

Levofloxacin  
Experiment 3

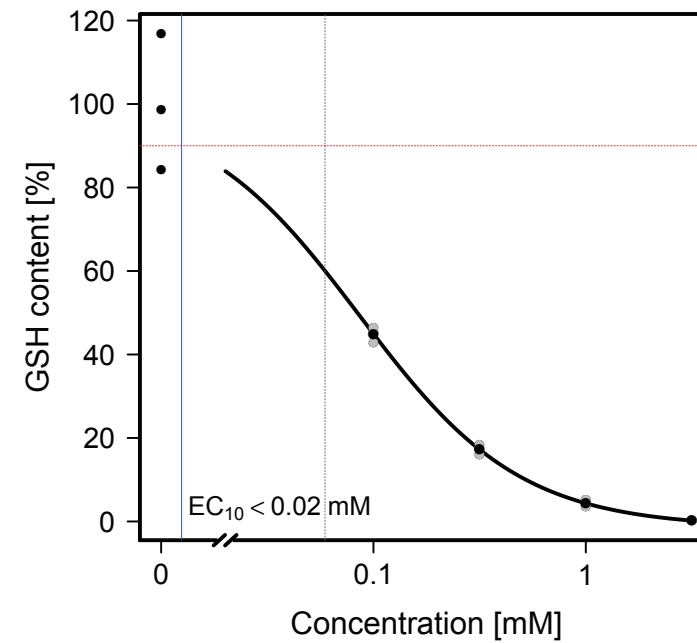

**Melatonin**  
Experiment 1

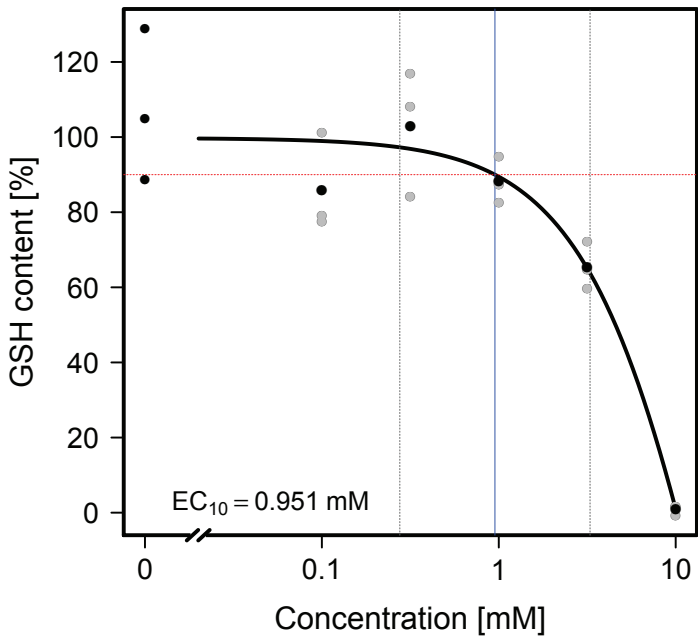

**Melatonin**  
Experiment 2

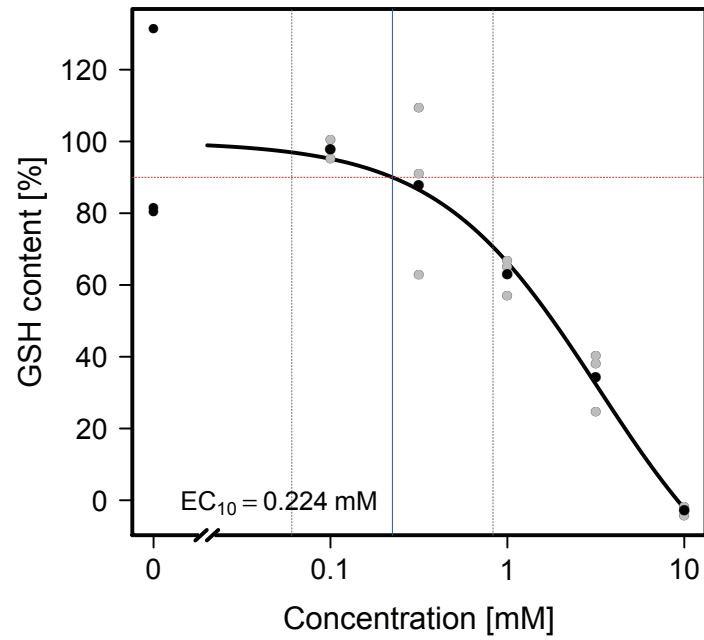

**Melatonin**  
Experiment 3

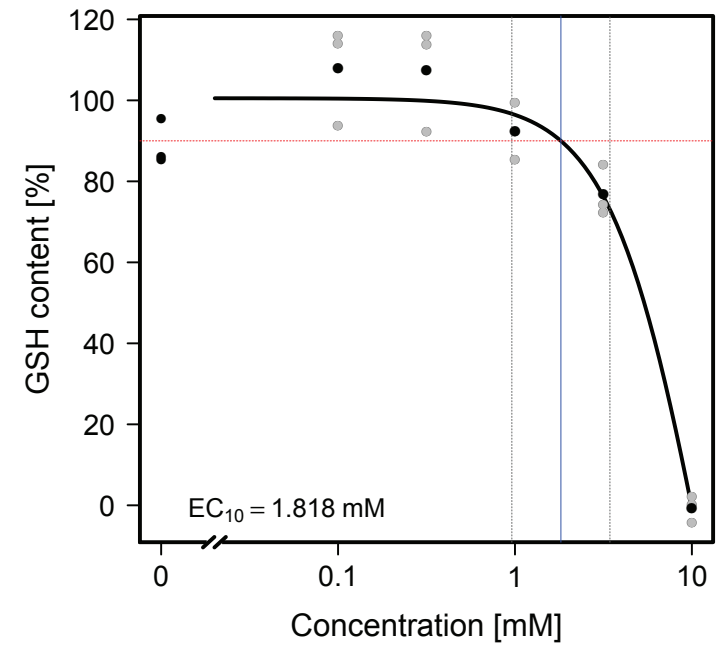

### Methylparabene

Experiment 1

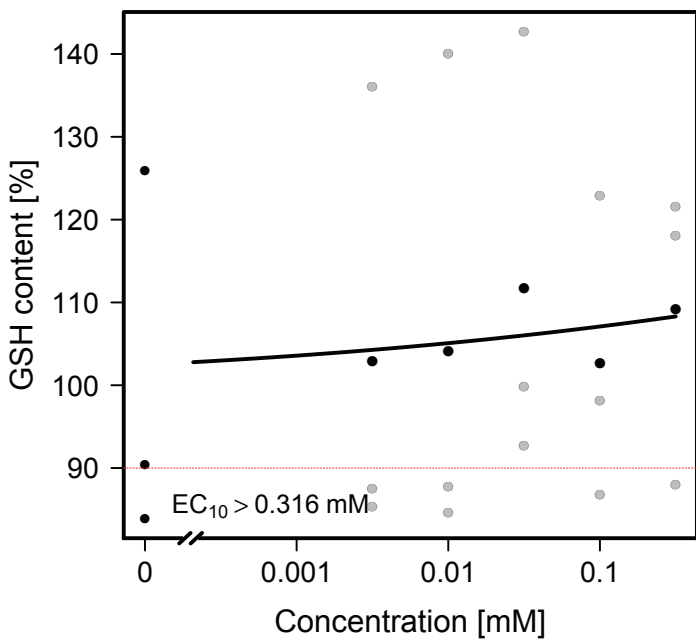

### Methylparabene

Experiment 2

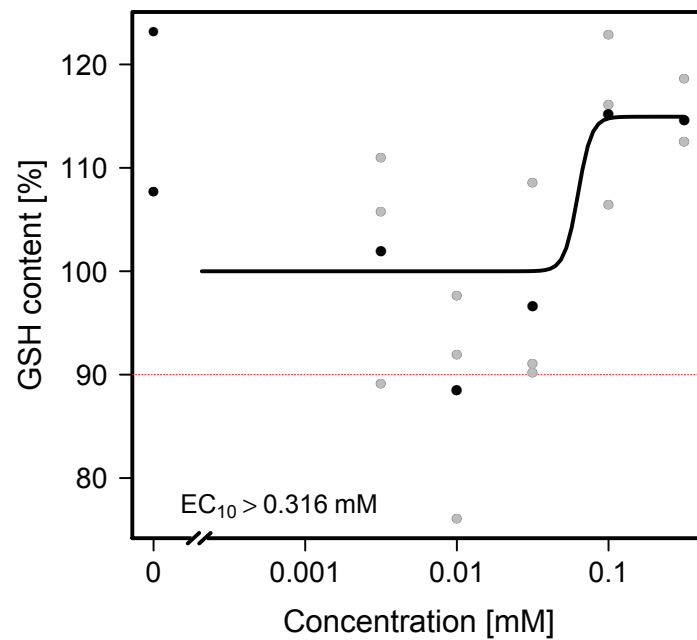

### Methylparabene

Experiment 3

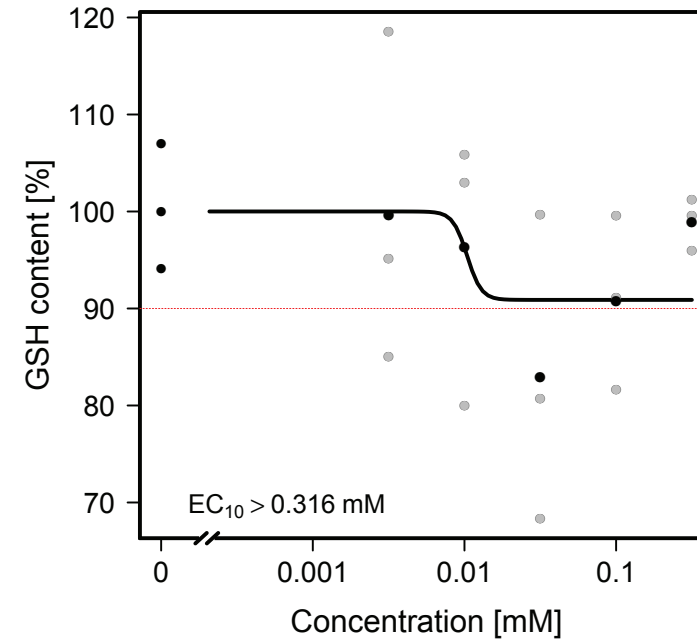

### N-Acetylcysteine

Experiment 1

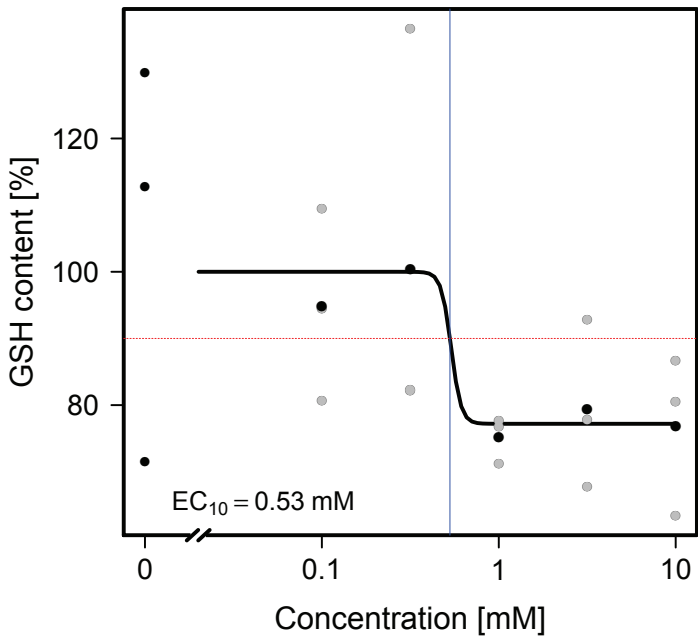

### N-Acetylcysteine

Experiment 2

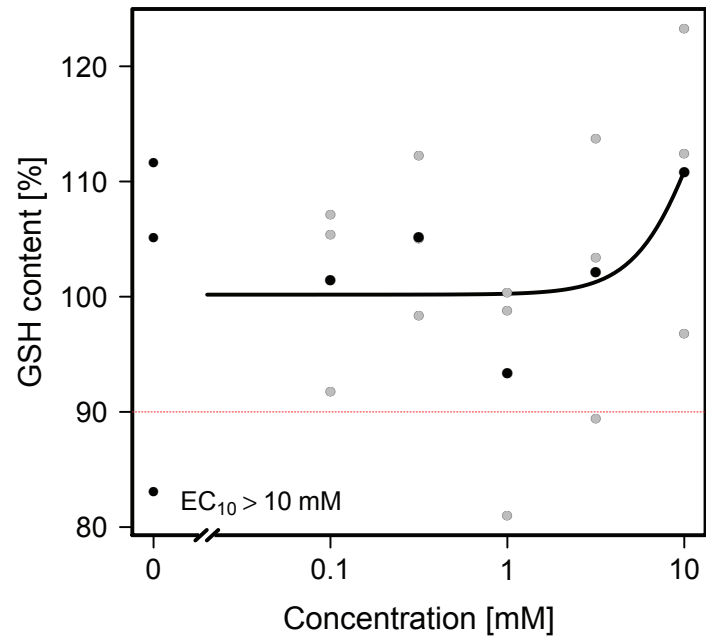

### N-Acetylcysteine

Experiment 3

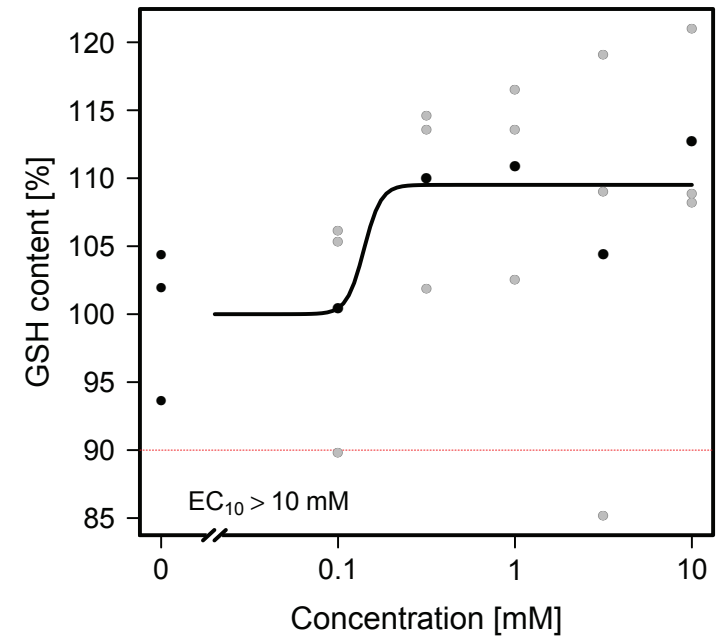

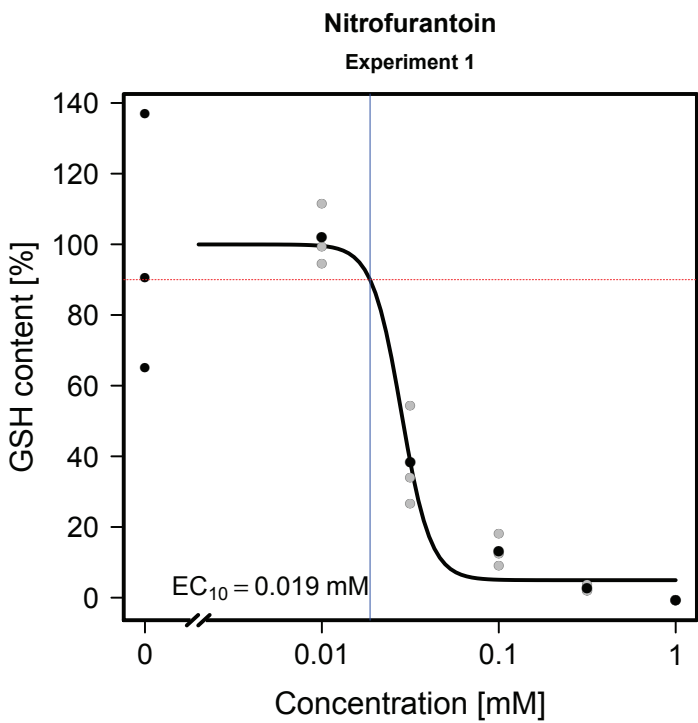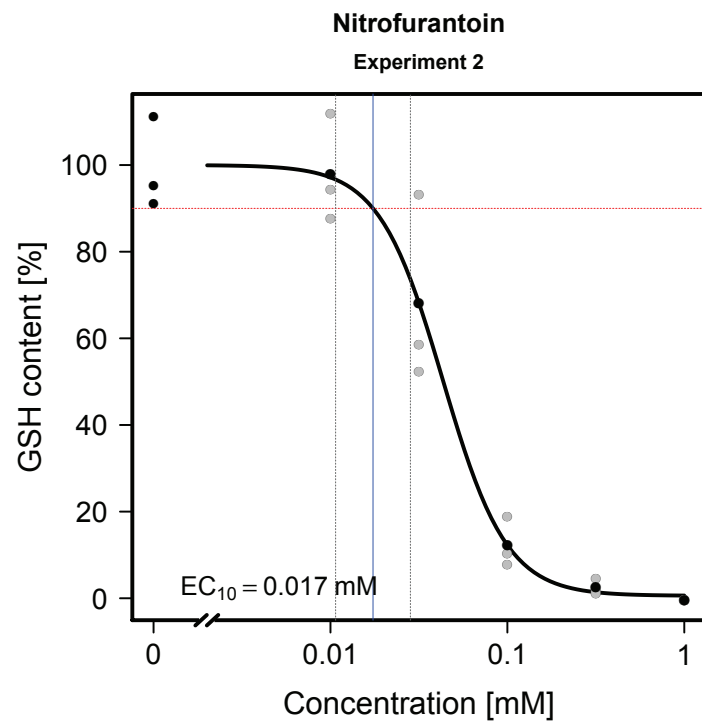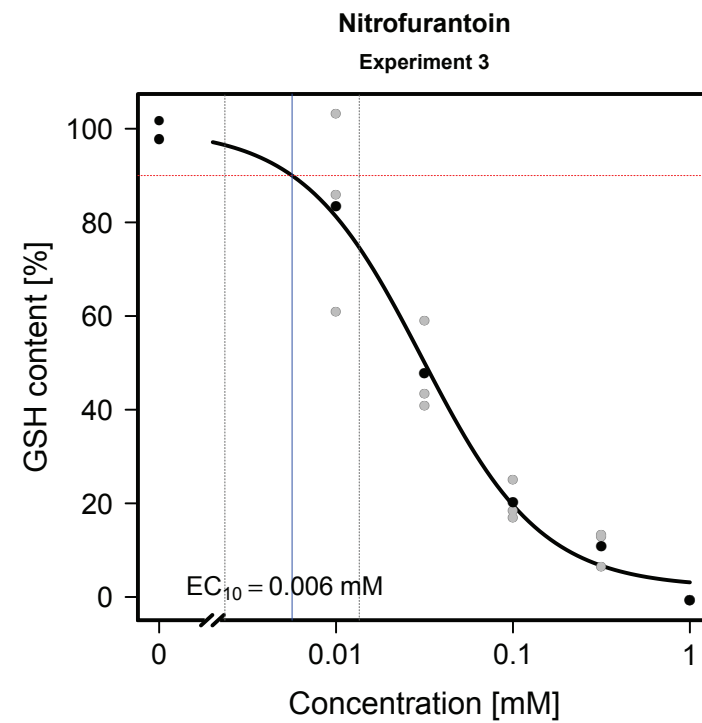

**Nimesulide**  
Experiment 1

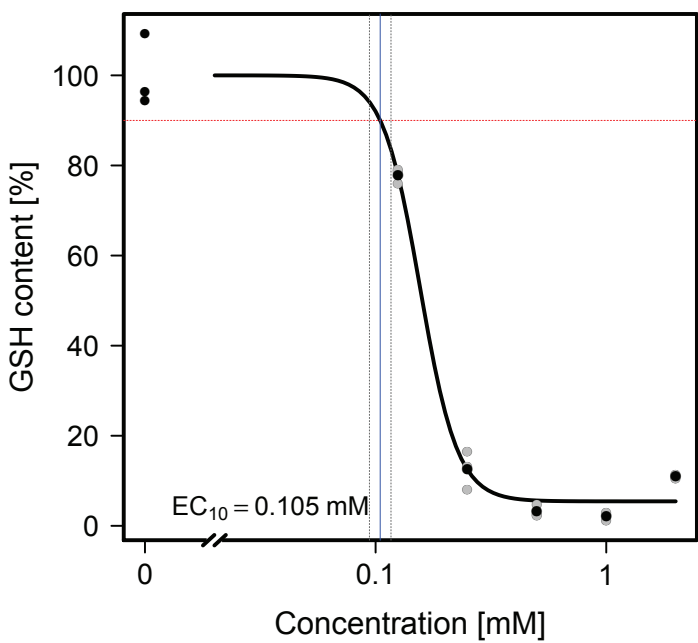

**Nimesulide**  
Experiment 2

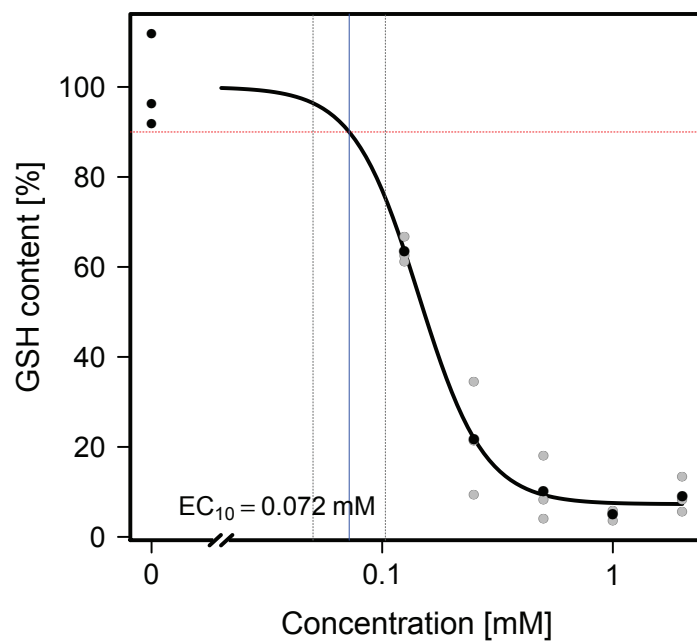

**Nimesulide**  
Experiment 3

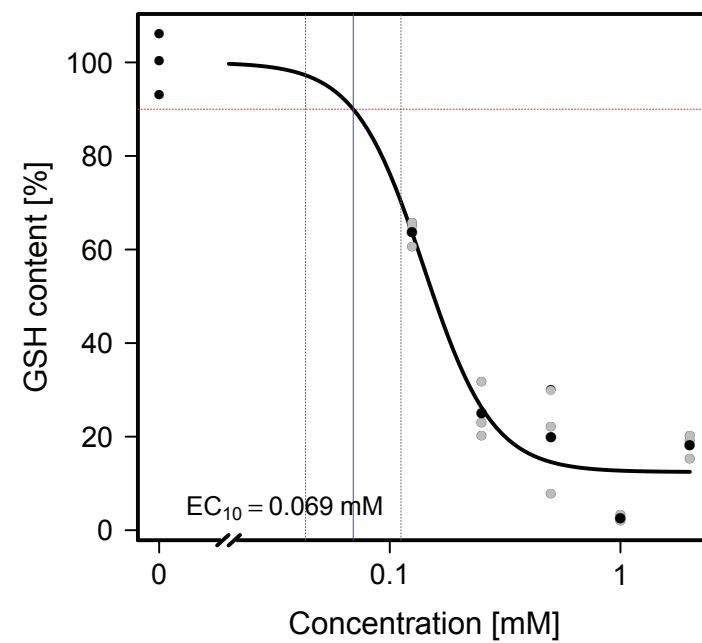

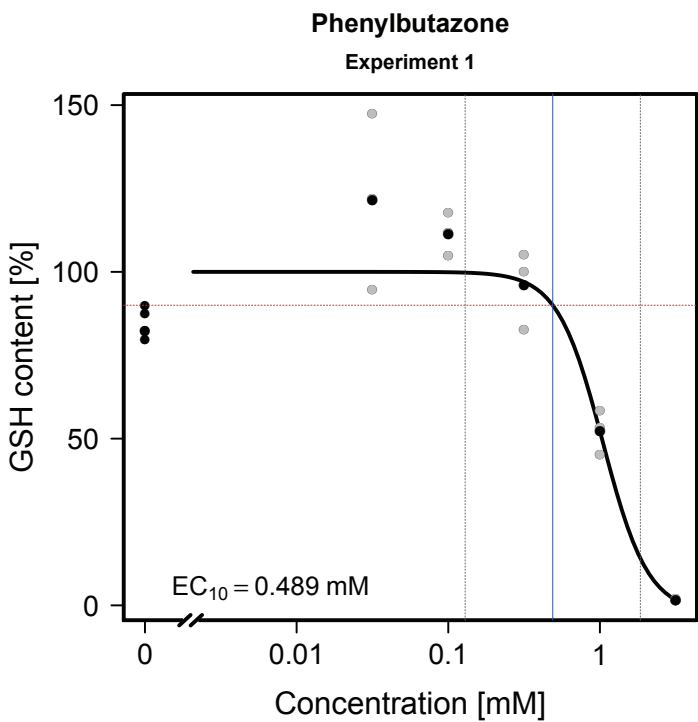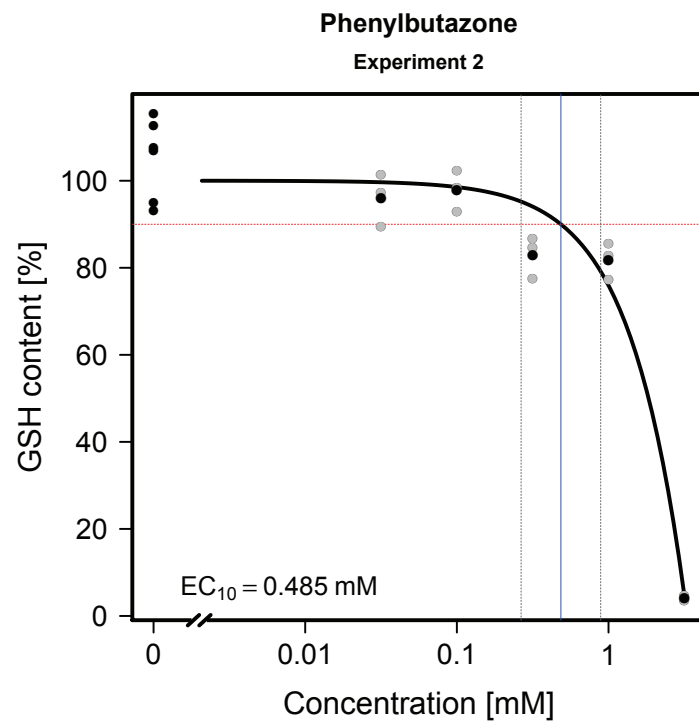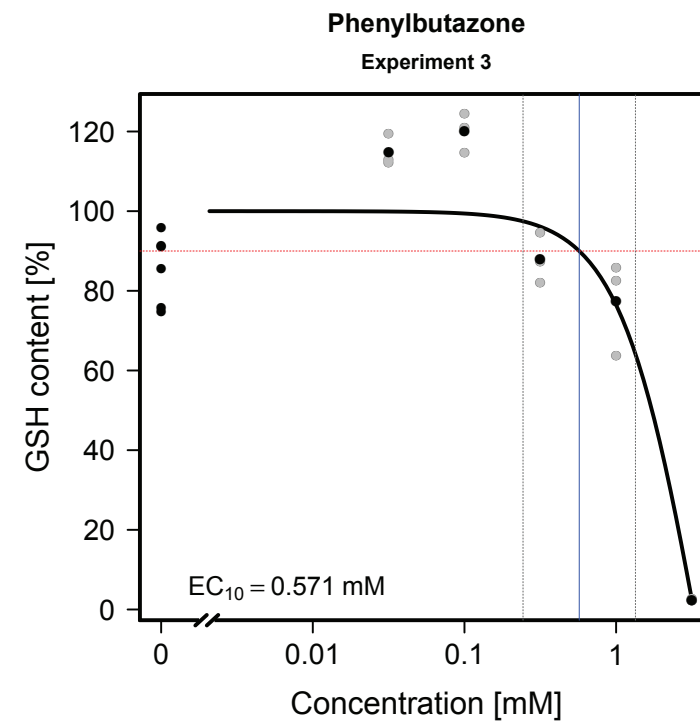

Promethazine  
Experiment 1

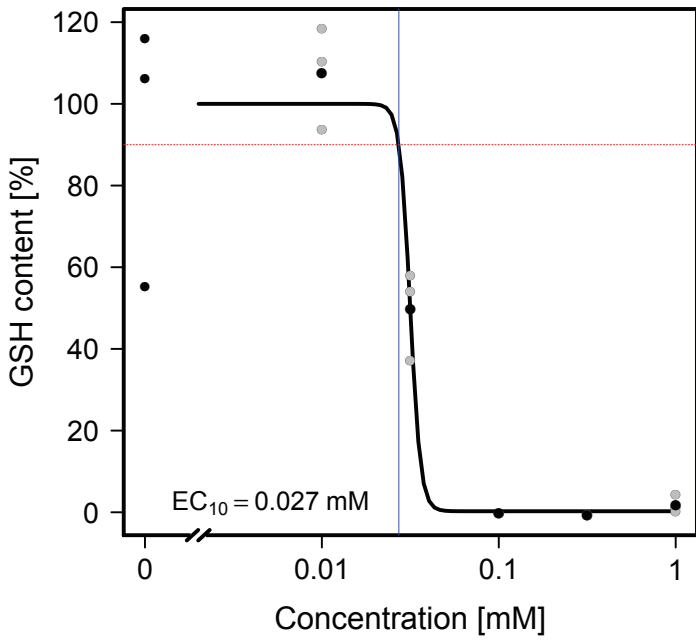

Promethazine  
Experiment 2

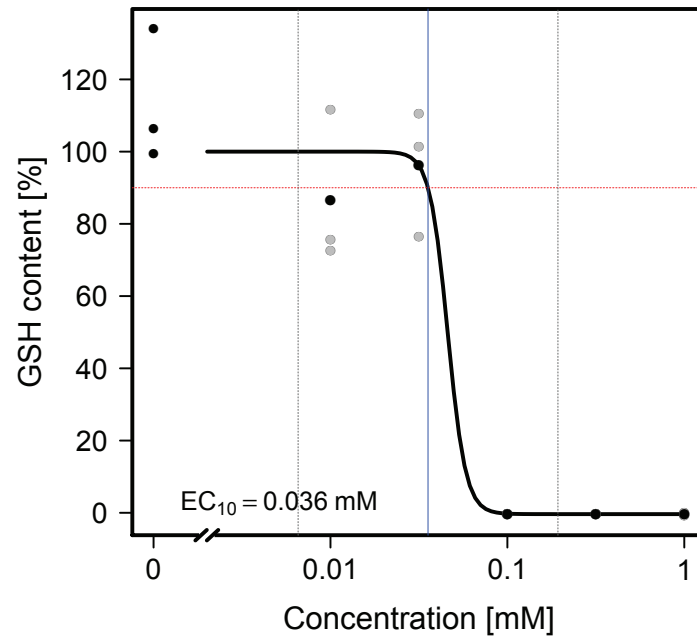

Promethazine  
Experiment 3

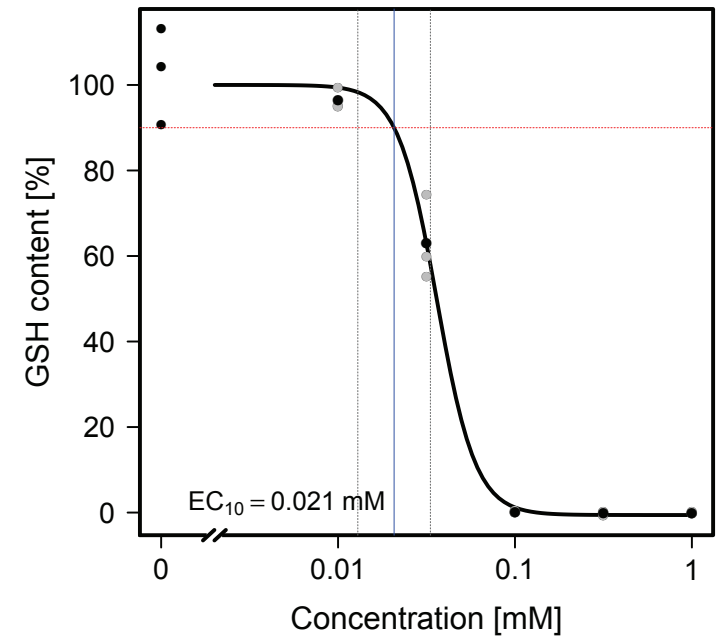

**Propranolol**  
Experiment 1

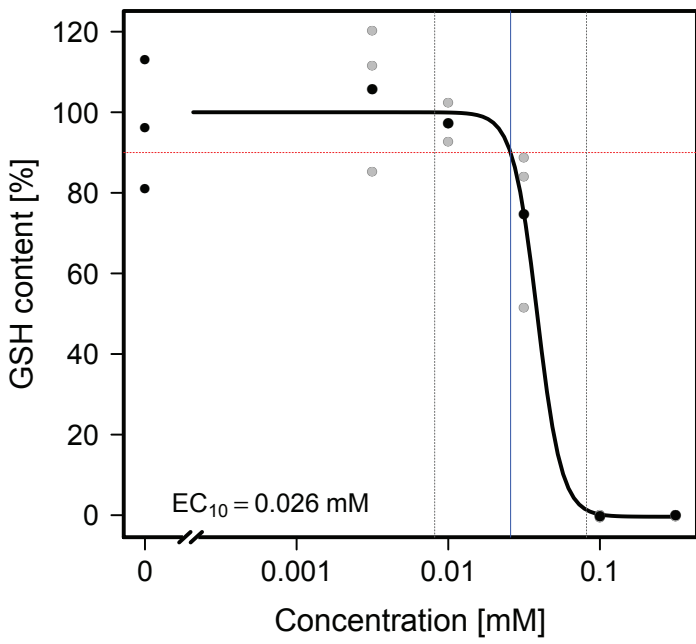

**Propranolol**  
Experiment 2

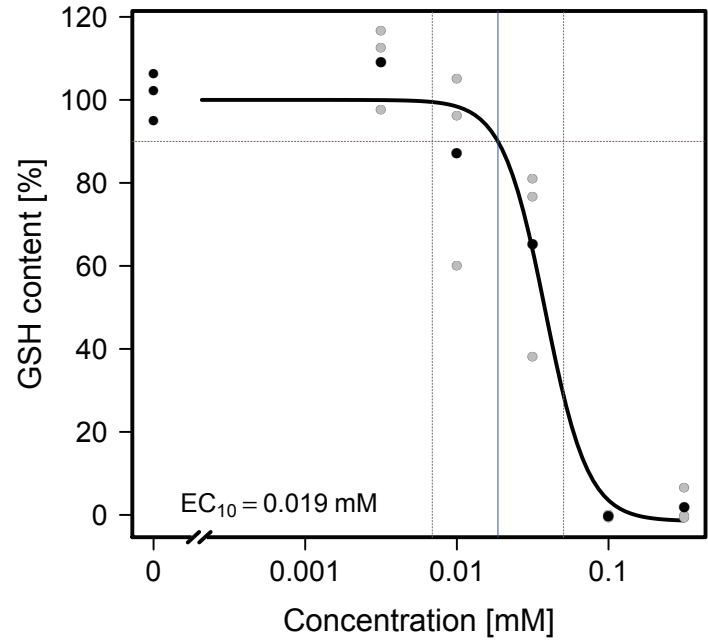

**Propranolol**  
Experiment 3

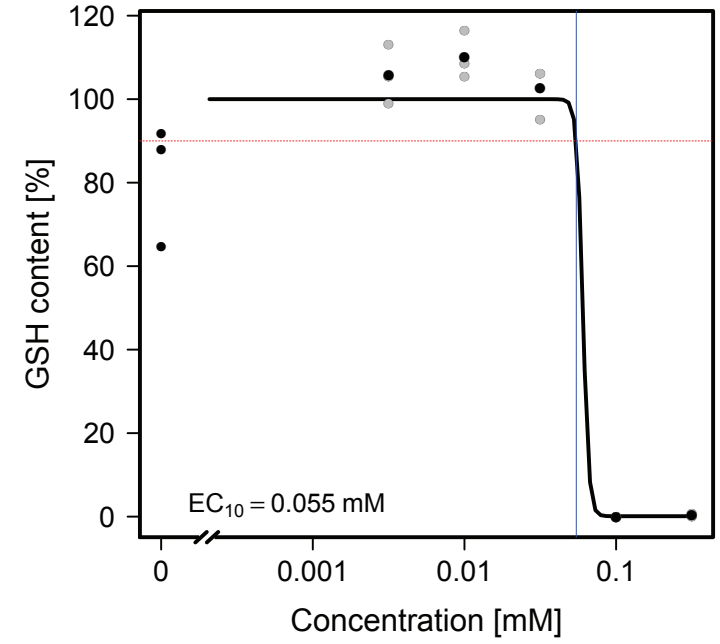

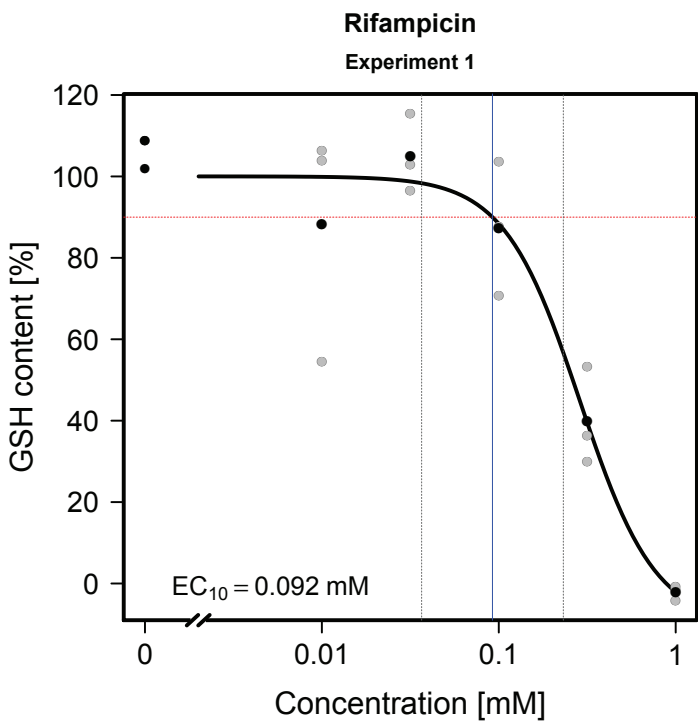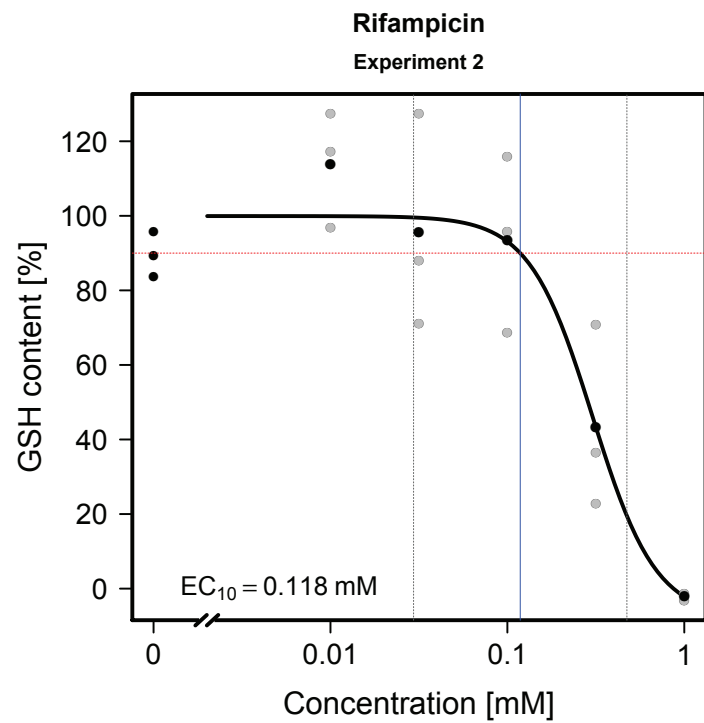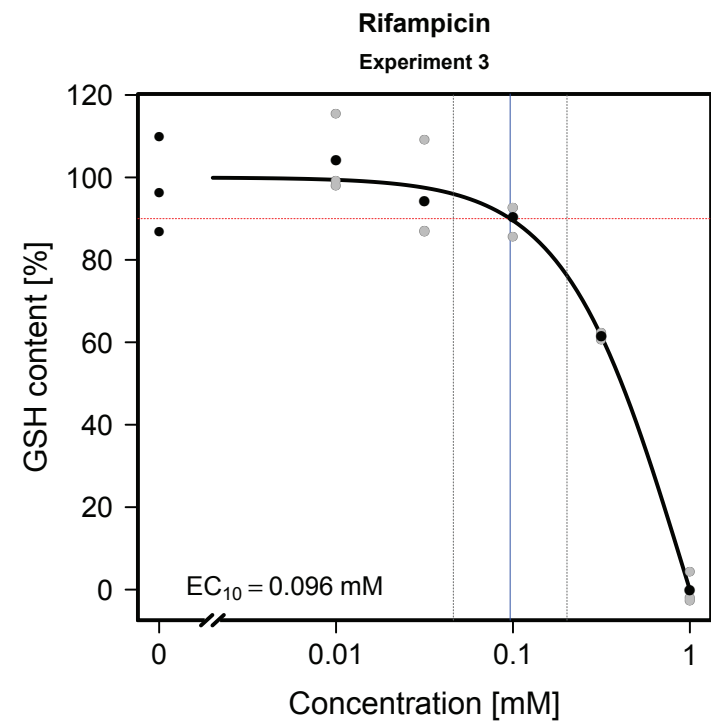

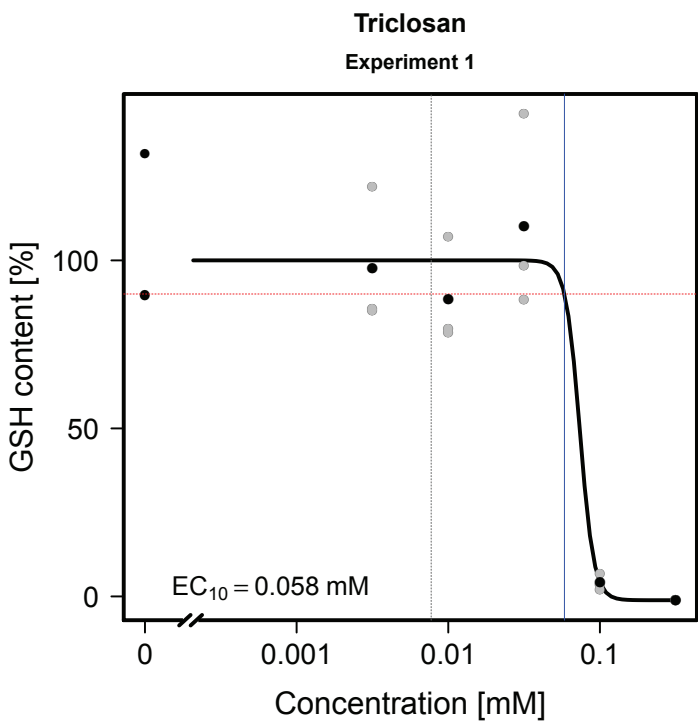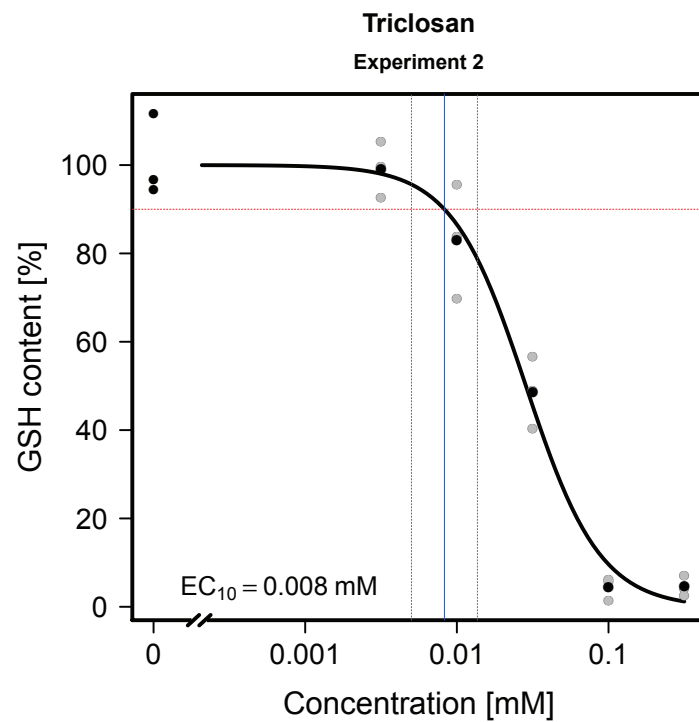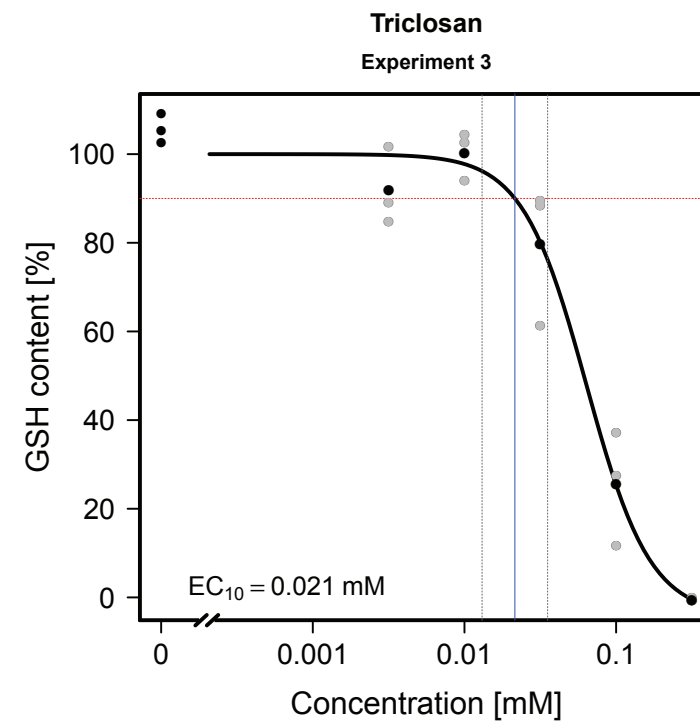

**Vitamin C**  
Experiment 1

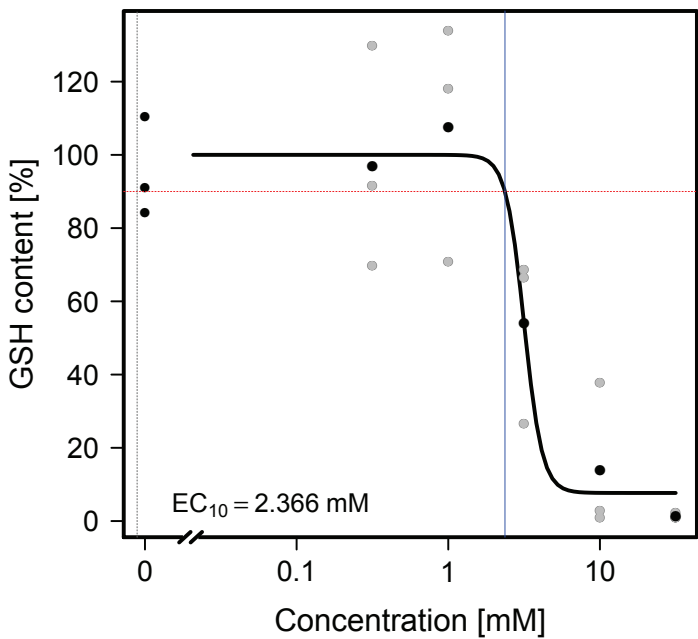

**Vitamin C**  
Experiment 2

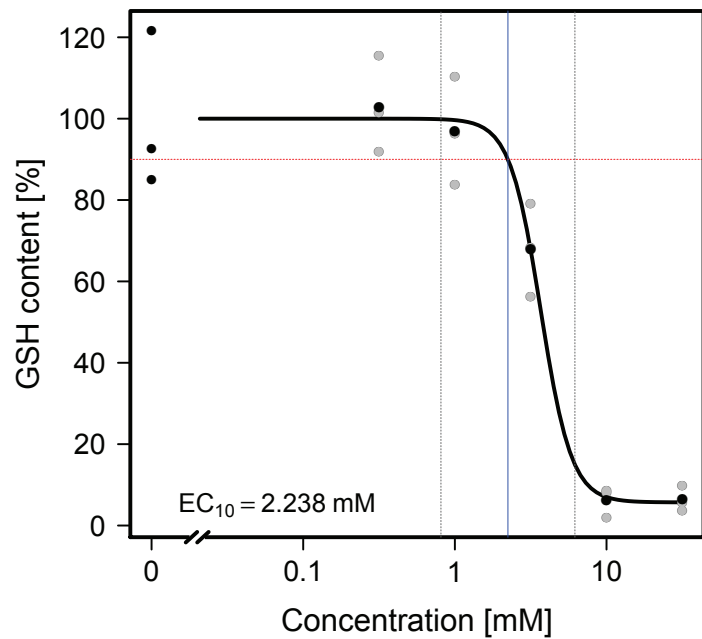

**Vitamin C**  
Experiment 3

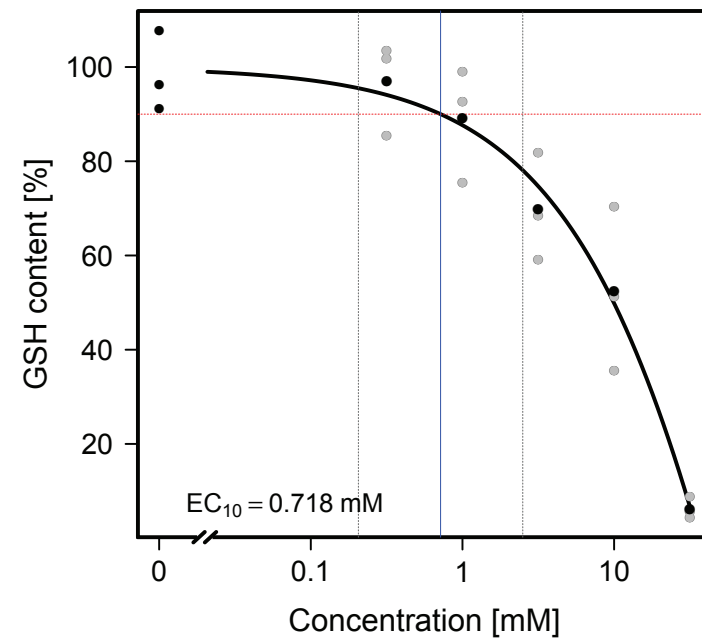

**Valproic acid**  
Experiment 1

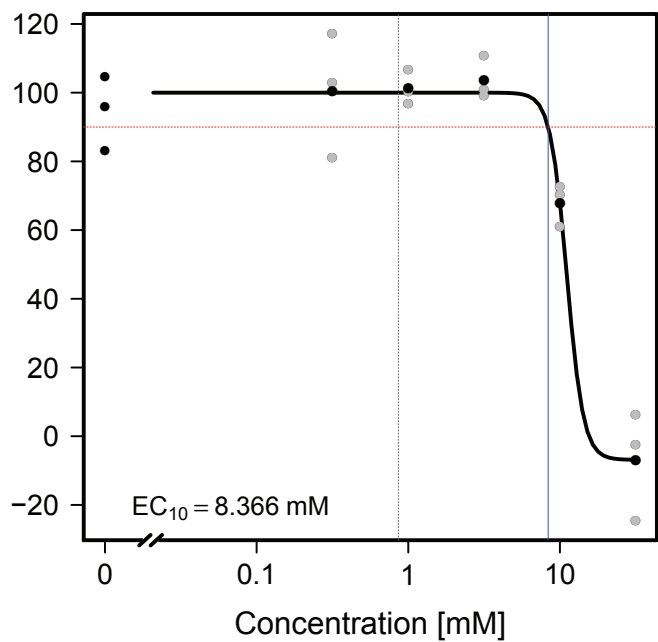

**Valproic acid**  
Experiment 2

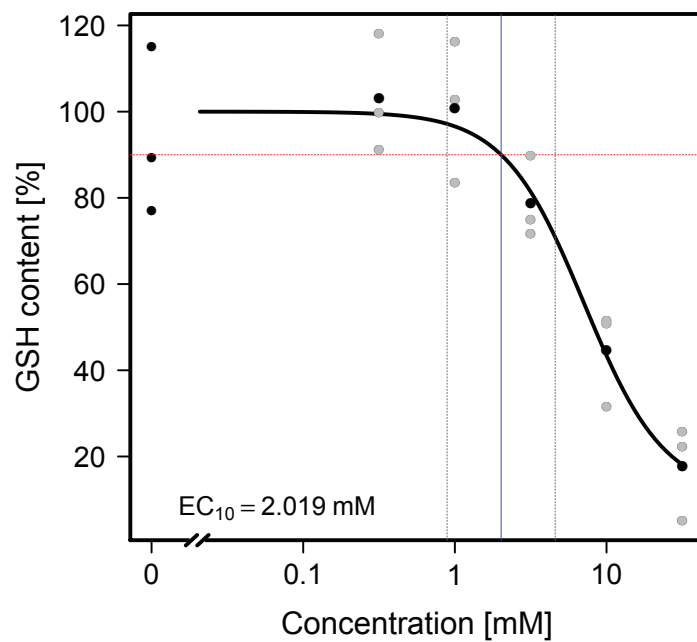

**Valproic acid**  
Experiment 3

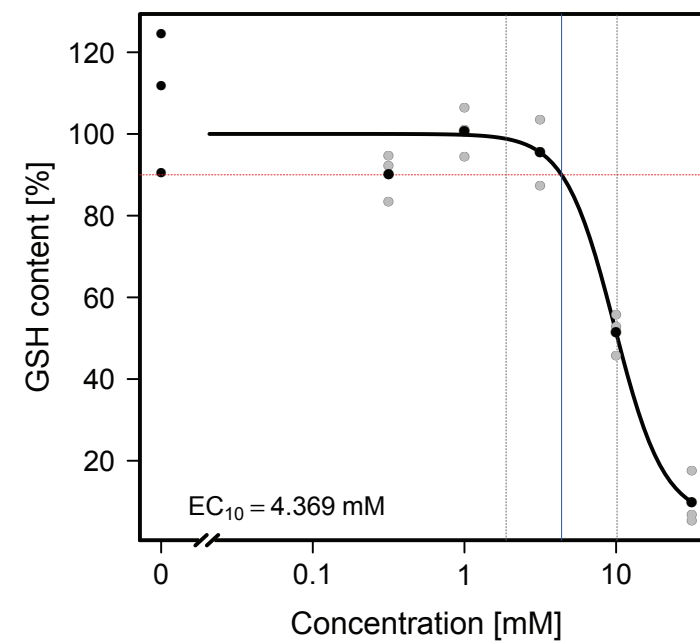

Supplement: MOESM13 [file 204_2019_2492_MOESM13_ESM.pdf › 204_2019_2492_MOESM13_ESM.pdf]
