# Supplementary material for: Prediction of human drug-induced liver injury (DILI) in relation to oral doses and blood concentrations
Source: Springer Nature journal article supplement (doi:10.1007/s00204-019-02492-9), 2019-06-01

Acetaminophen  
Experiment 1

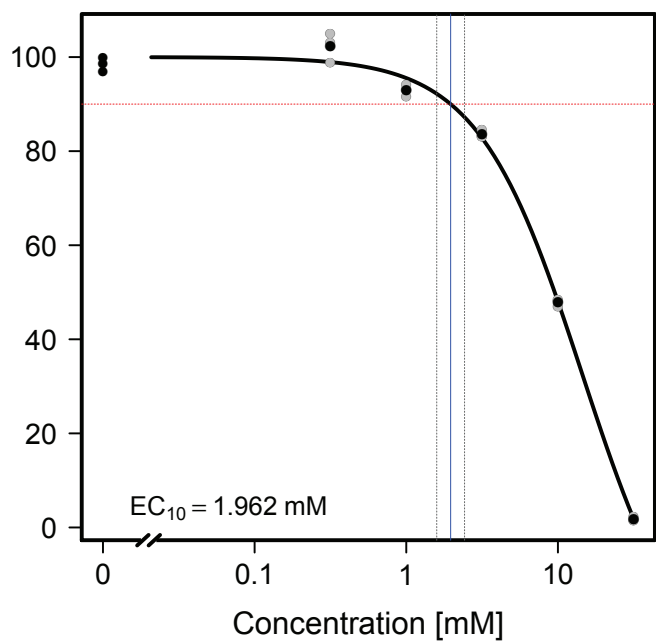

Acetaminophen  
Experiment 2

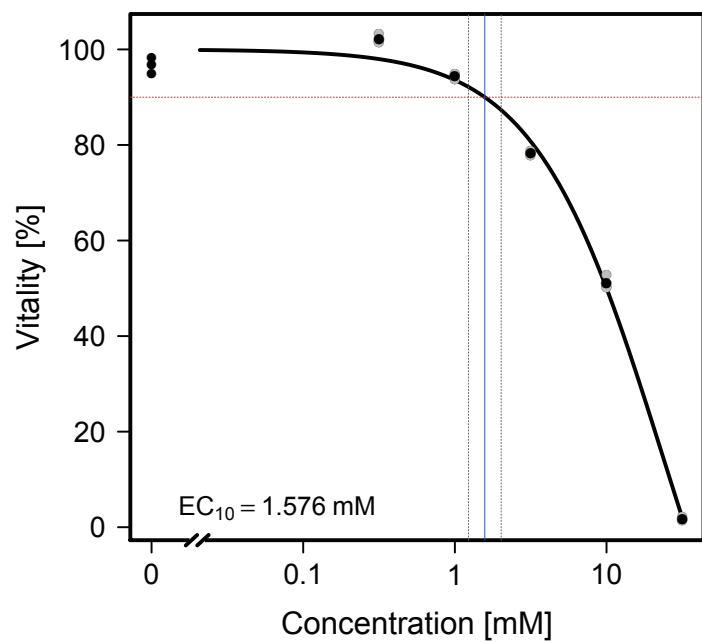

Acetaminophen  
Experiment 3

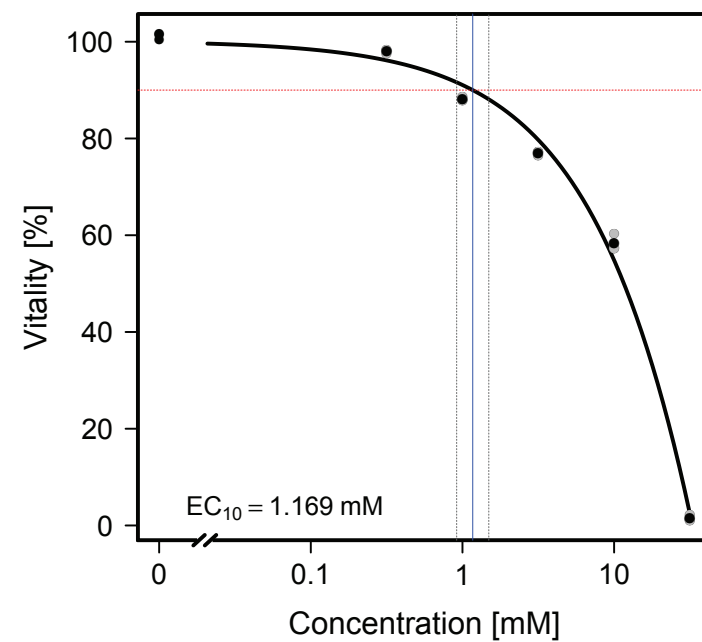

**Aspirin**  
Experiment 1

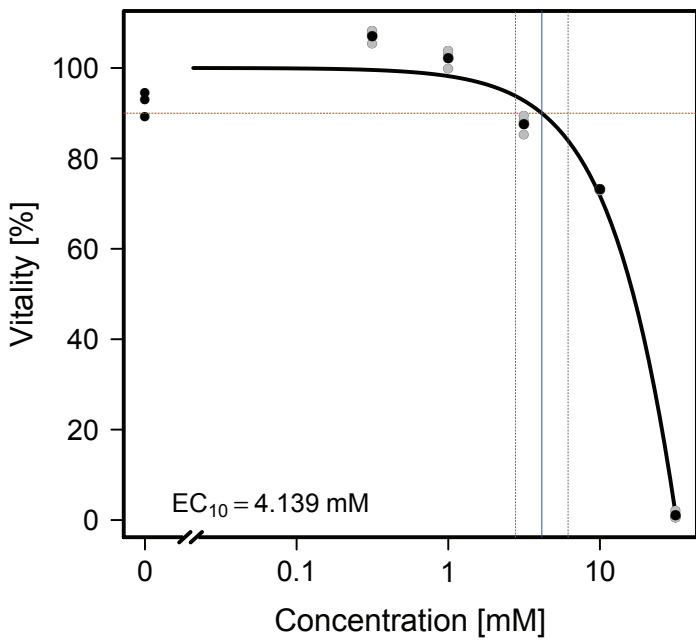

**Aspirin**  
Experiment 2

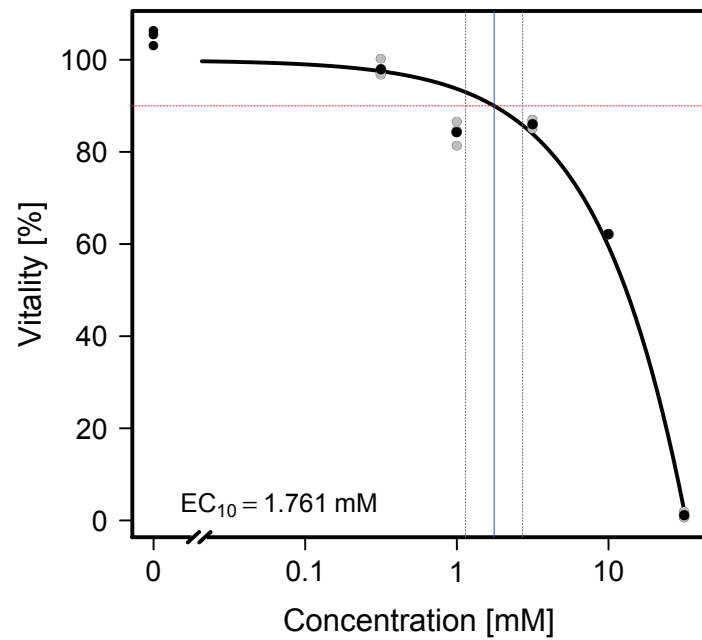

**Aspirin**  
Experiment 3

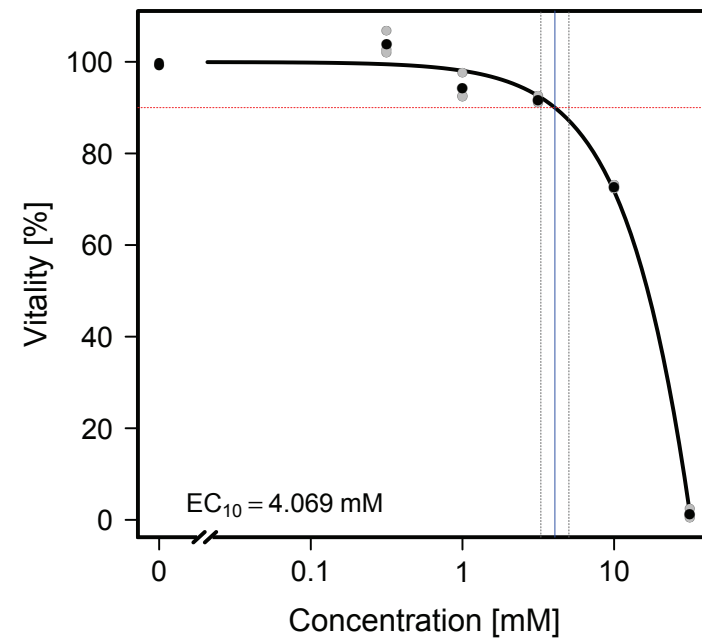

**Buspirone**  
Experiment 1

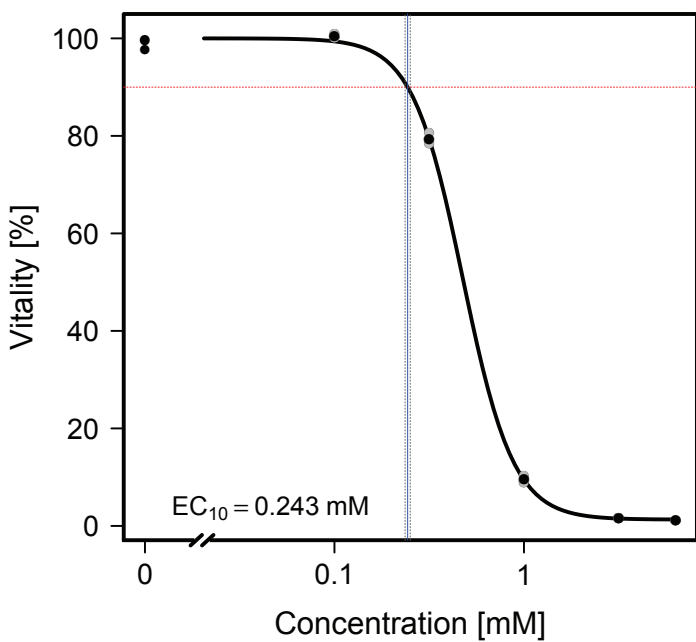

**Buspirone**  
Experiment 2

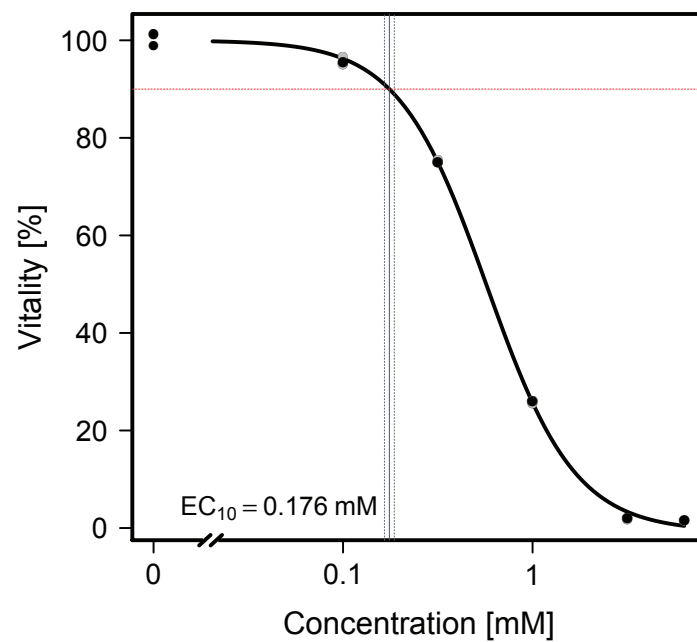

**Buspirone**  
Experiment 3

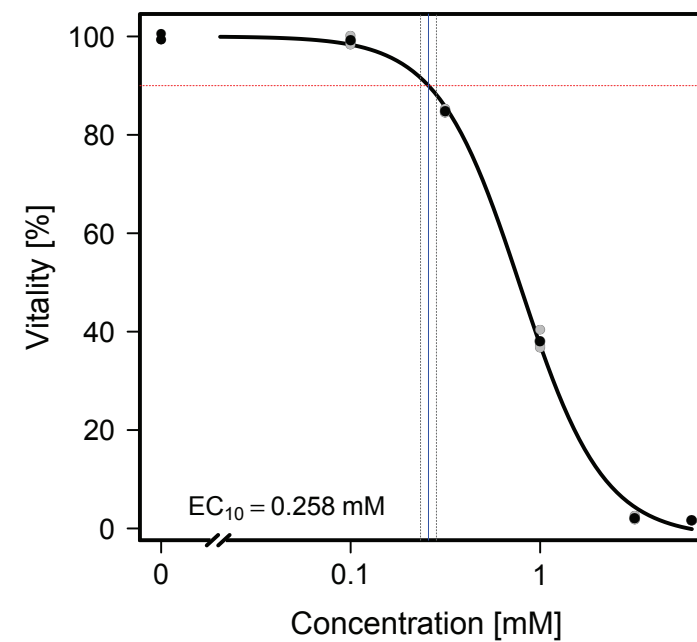

Carbamazepine  
Experiment 1

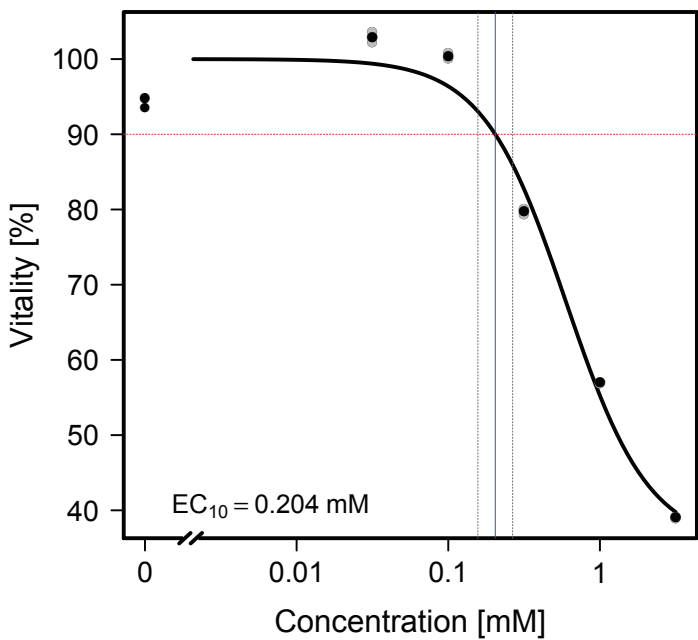

Carbamazepine  
Experiment 2

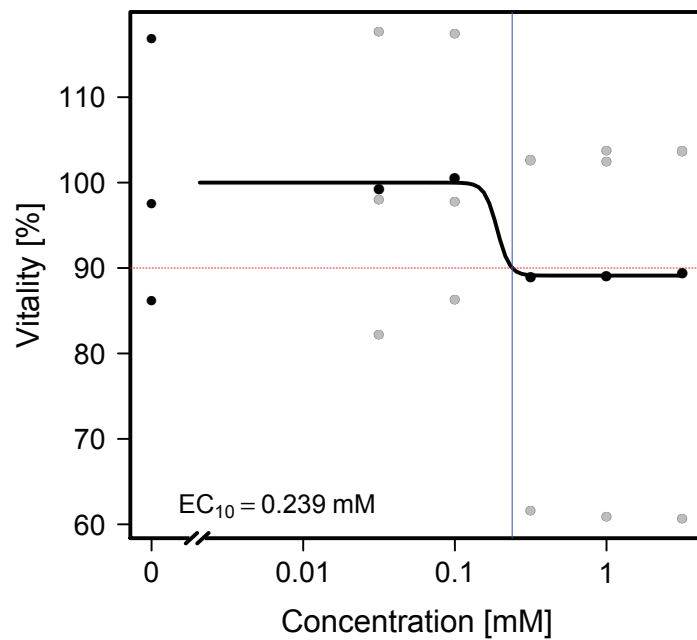

Carbamazepine  
Experiment 3

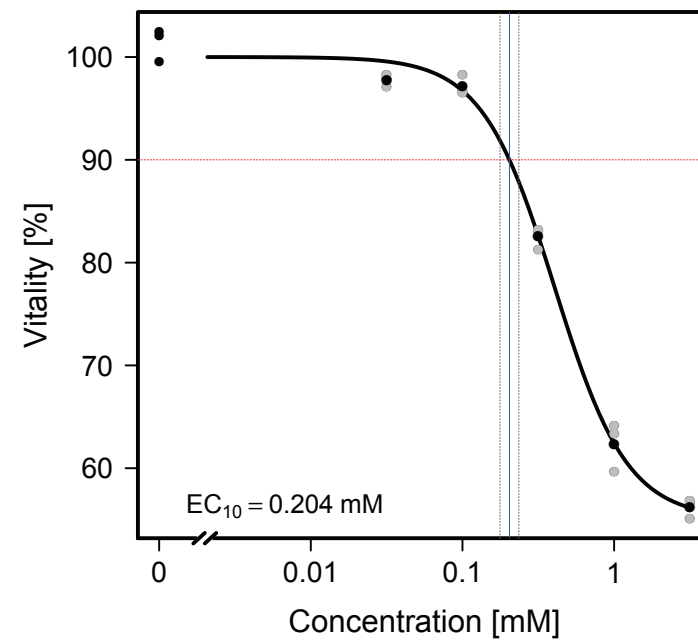

### Chlorpheniramine

Experiment 1

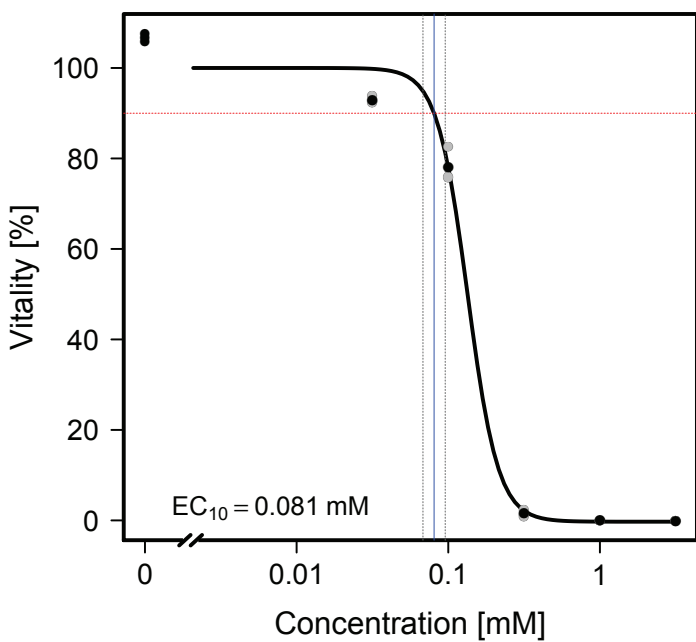

### Chlorpheniramine

Experiment 2

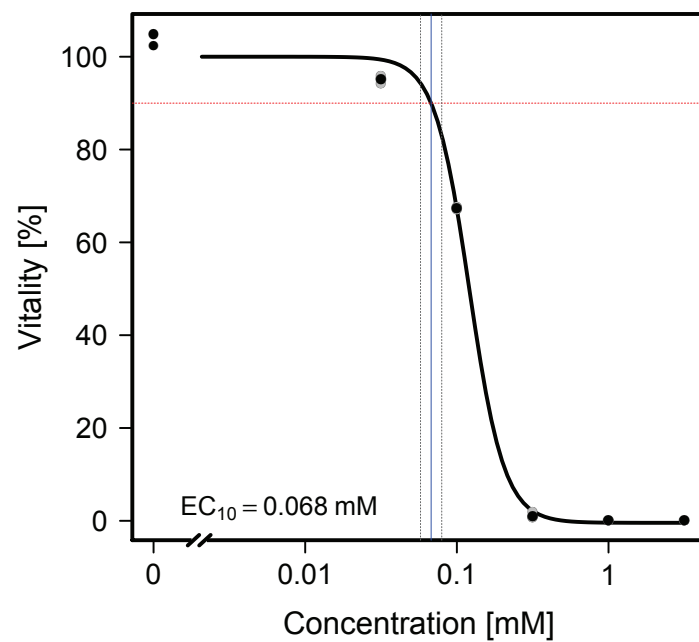

### Chlorpheniramine

Experiment 3

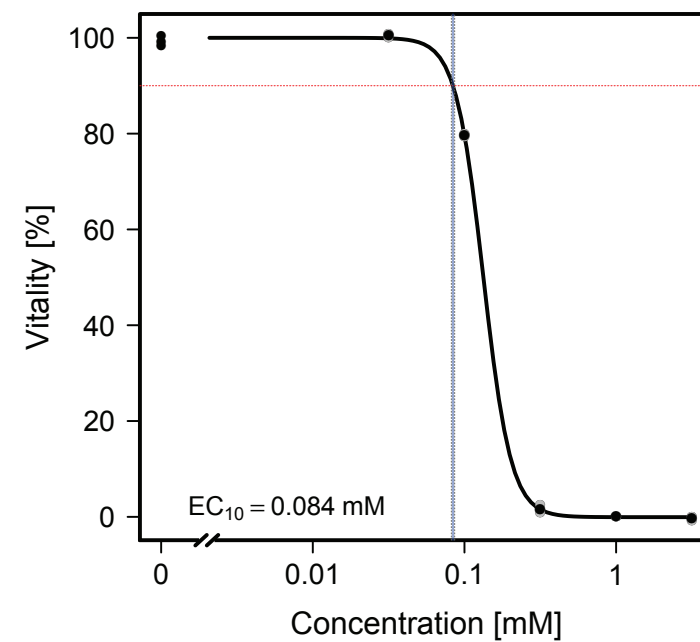

**Clonidine**  
Experiment 1

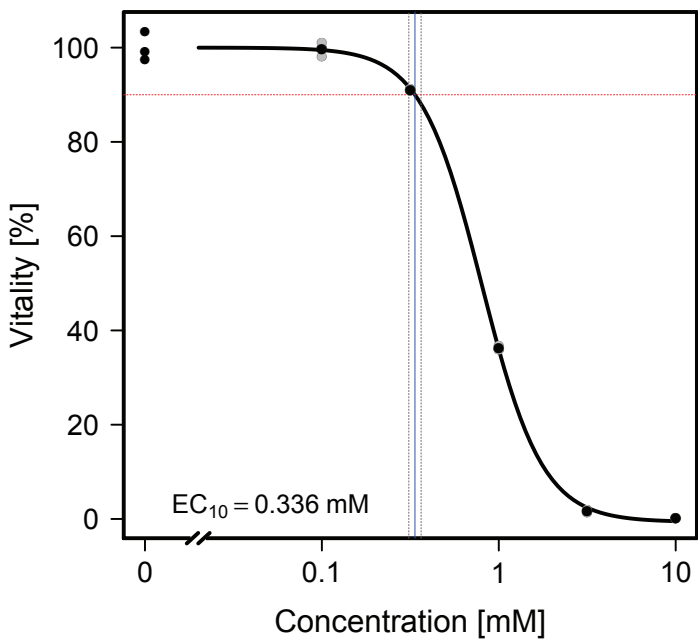

**Clonidine**  
Experiment 2

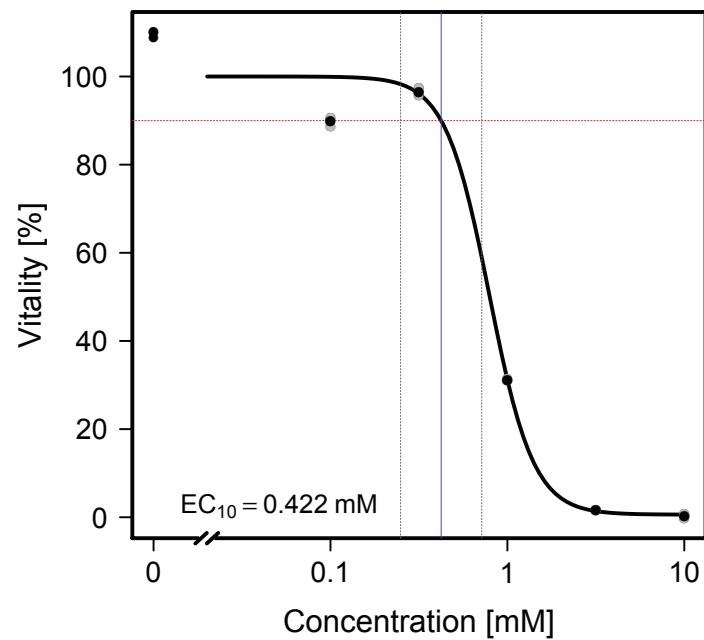

**Clonidine**  
Experiment 3

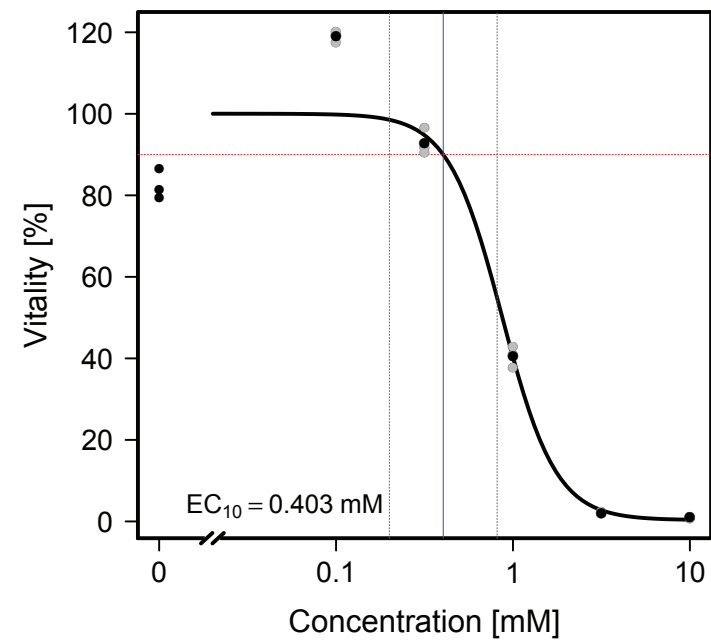

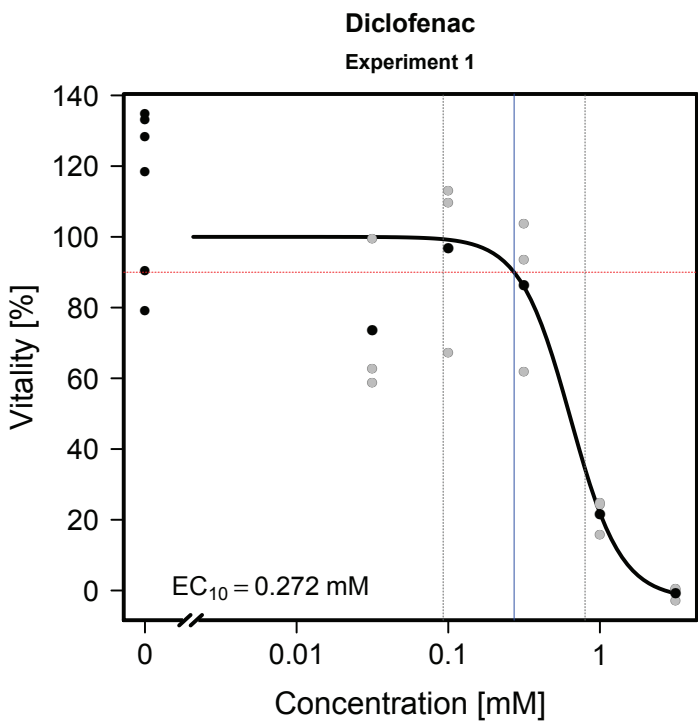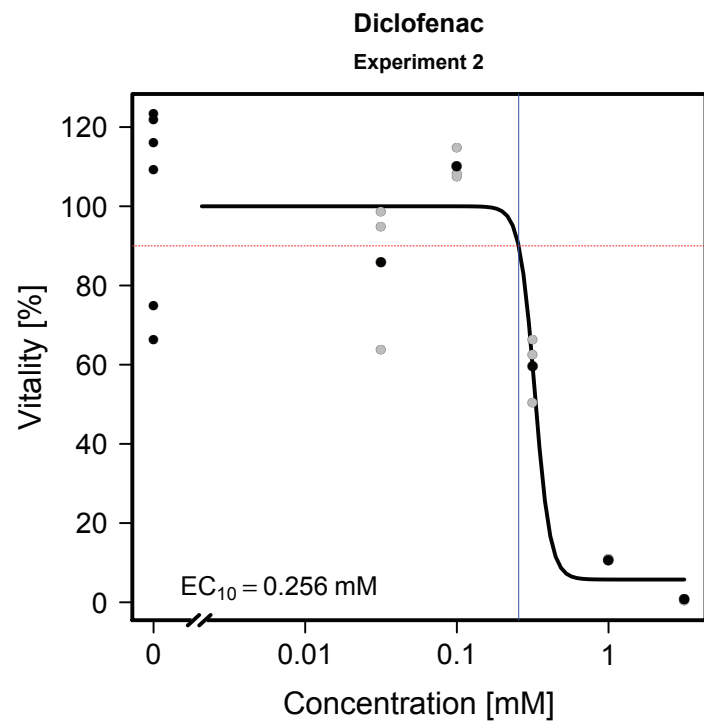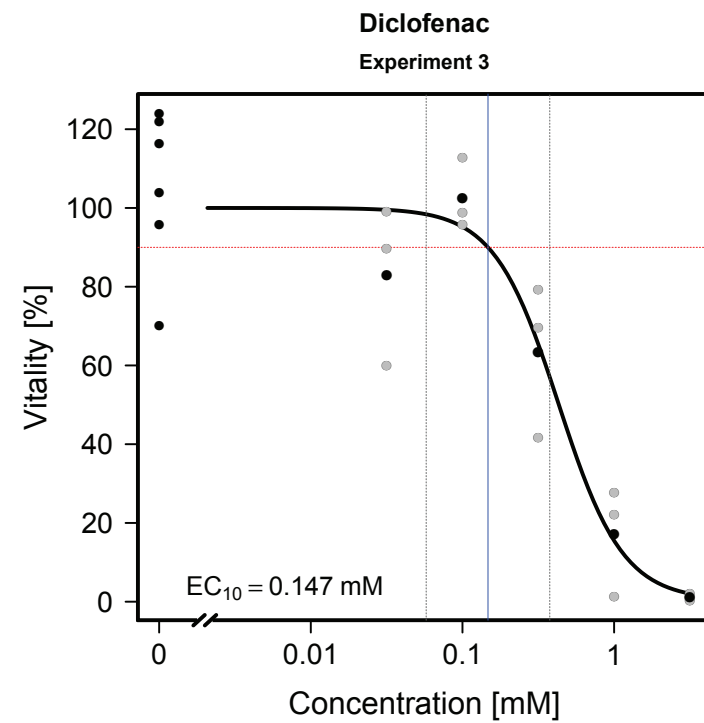

### Dimethylsulfoxide

#### Experiment 1

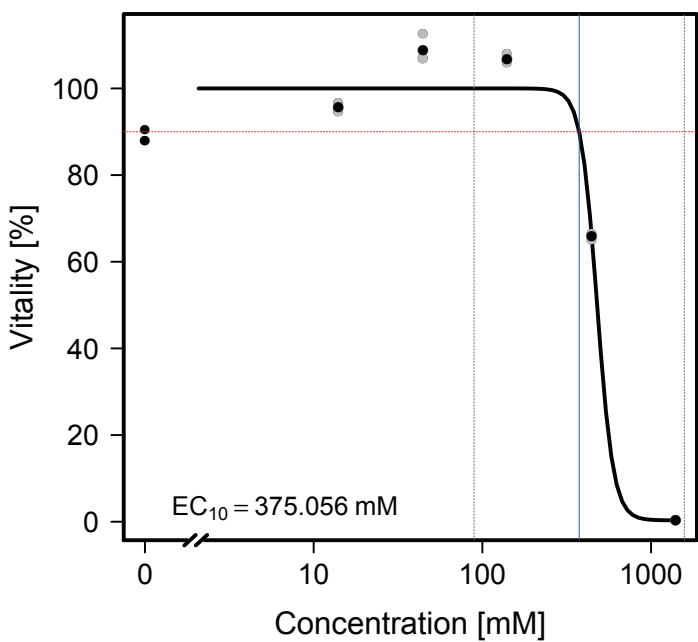

### Dimethylsulfoxide

#### Experiment 2

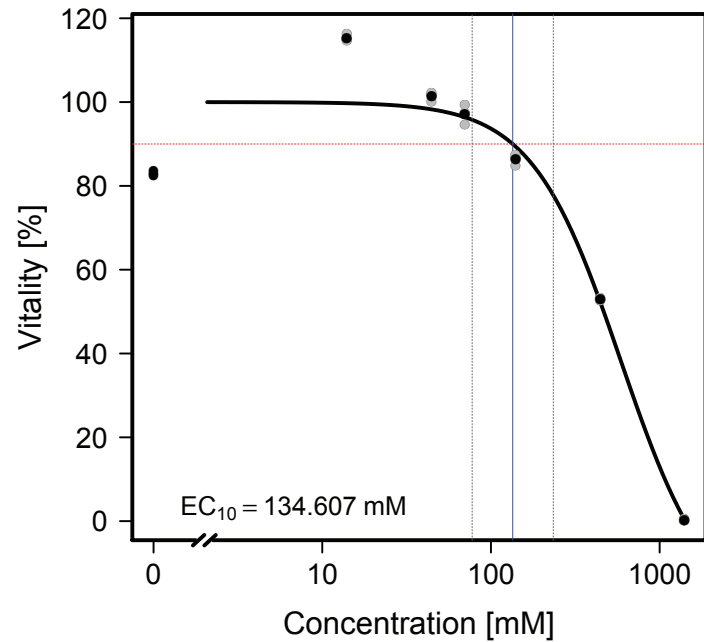

### Dimethylsulfoxide

#### Experiment 3

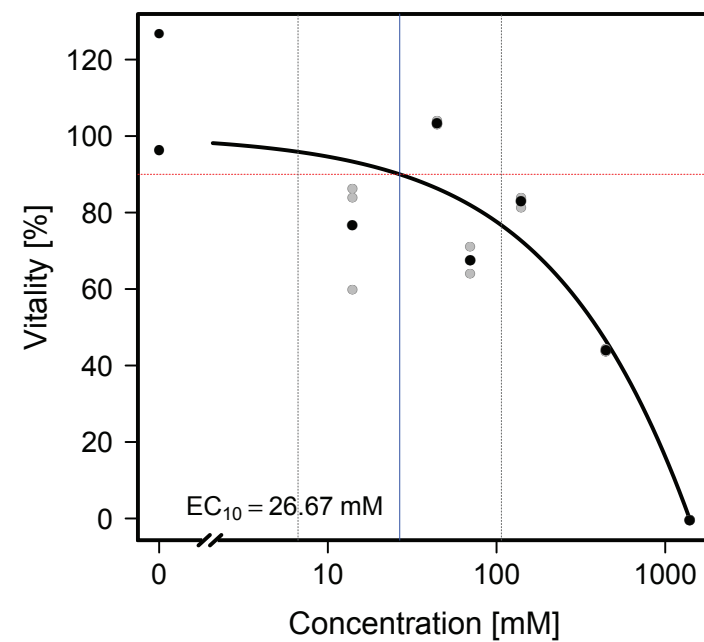

**Ethanol**  
Experiment 1

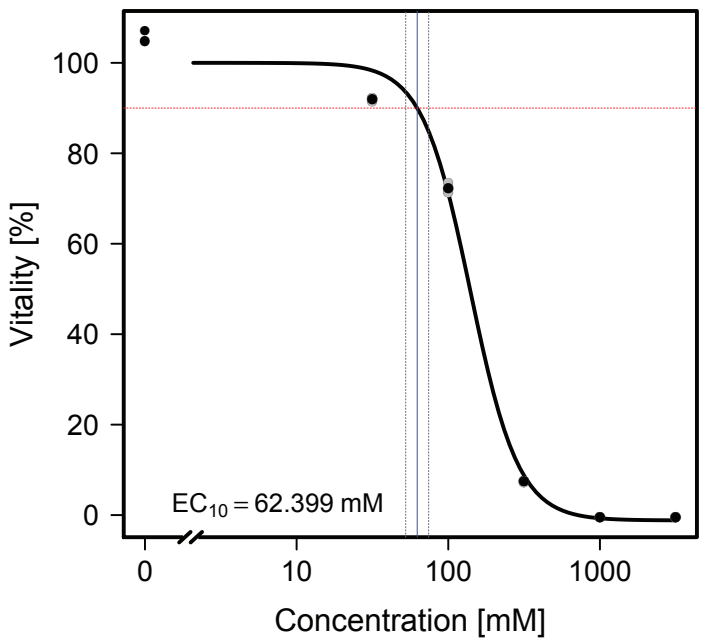

**Ethanol**  
Experiment 2

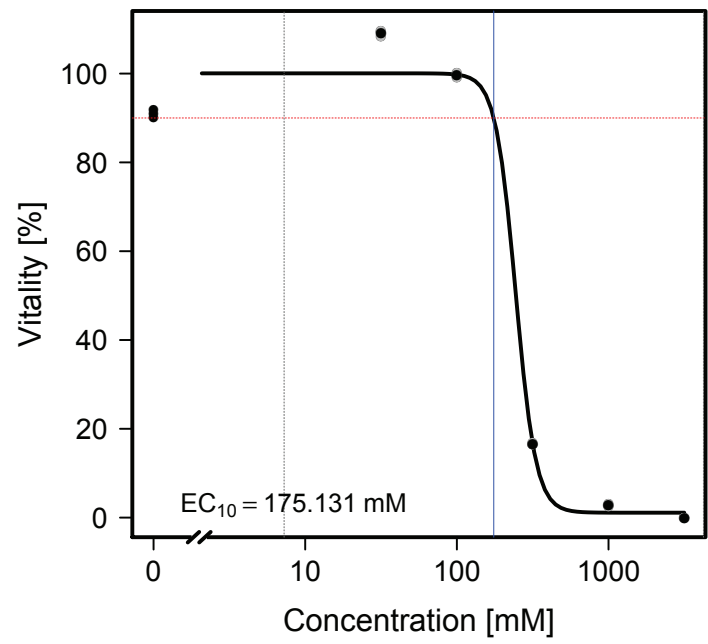

**Ethanol**  
Experiment 3

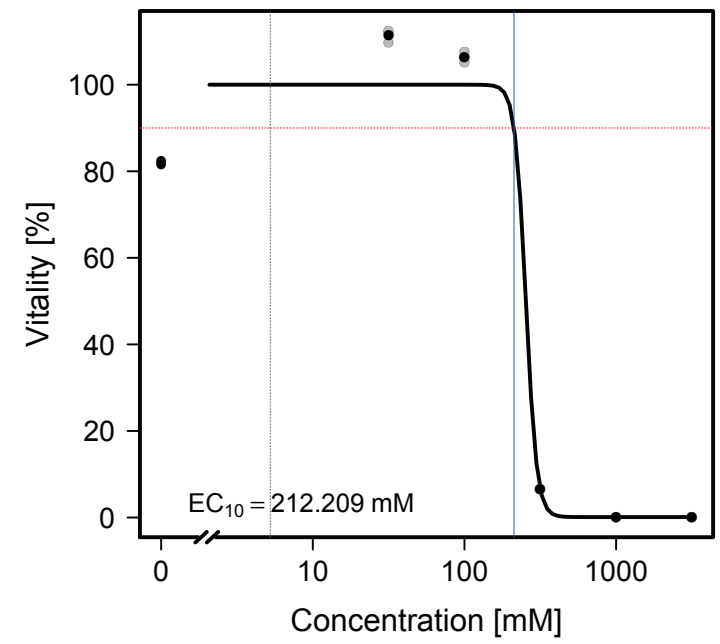

Famotidine  
Experiment 1

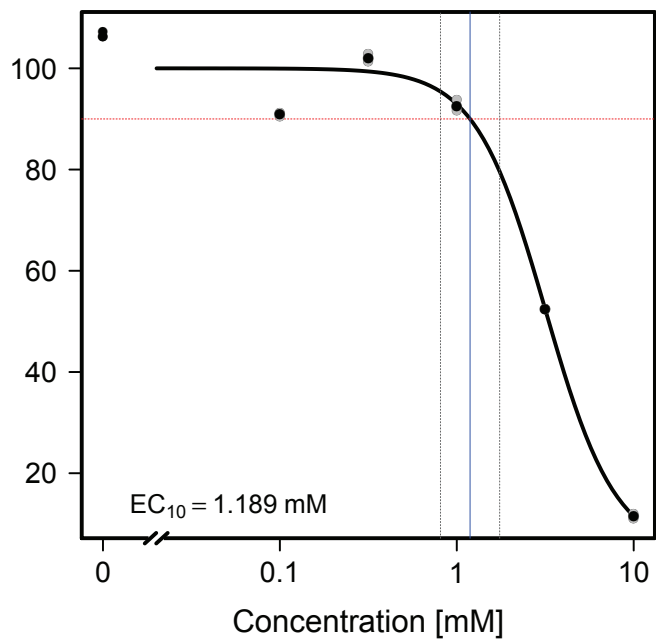

Famotidine  
Experiment 2

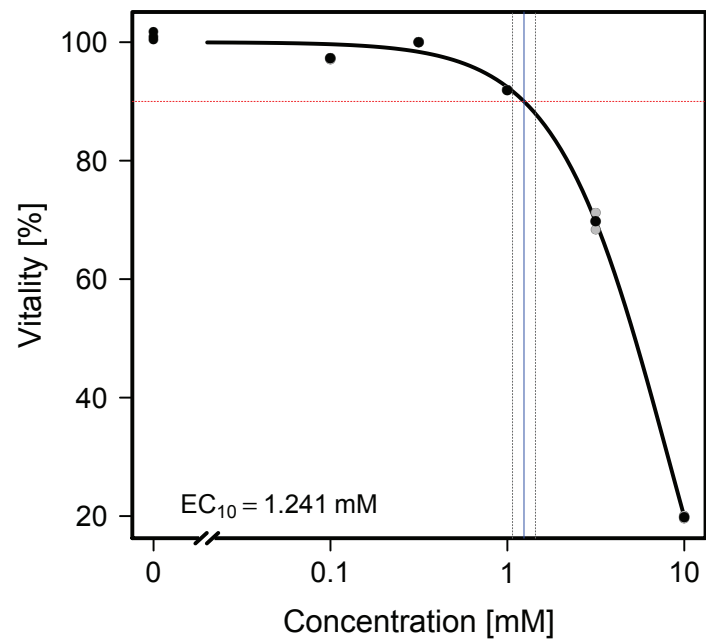

Famotidine  
Experiment 3

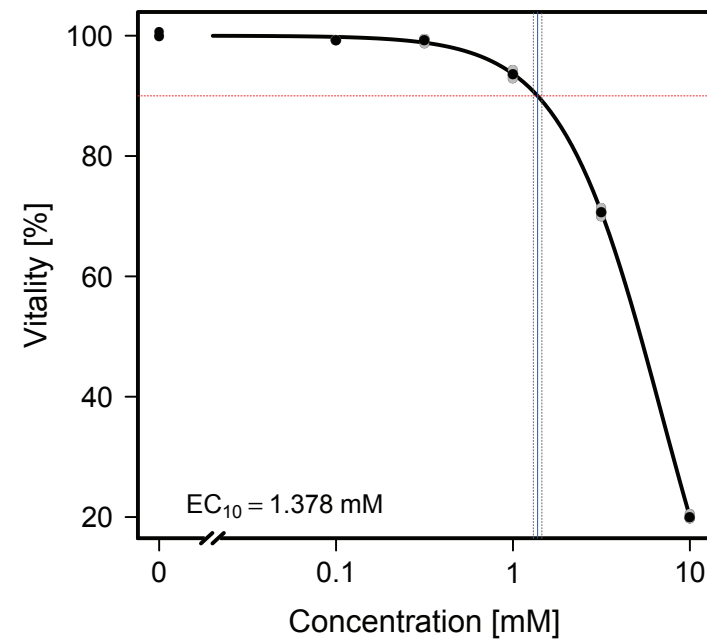

**Glucose**  
Experiment 1

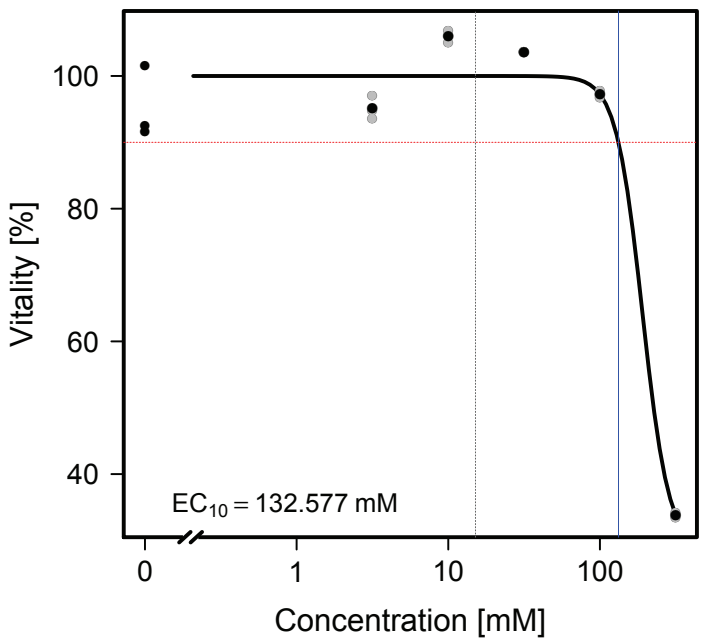

**Glucose**  
Experiment 2

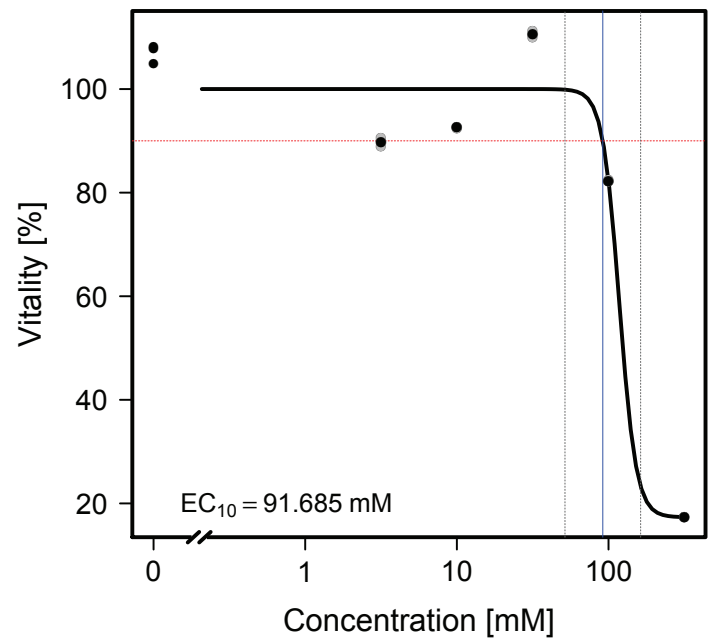

**Glucose**  
Experiment 3

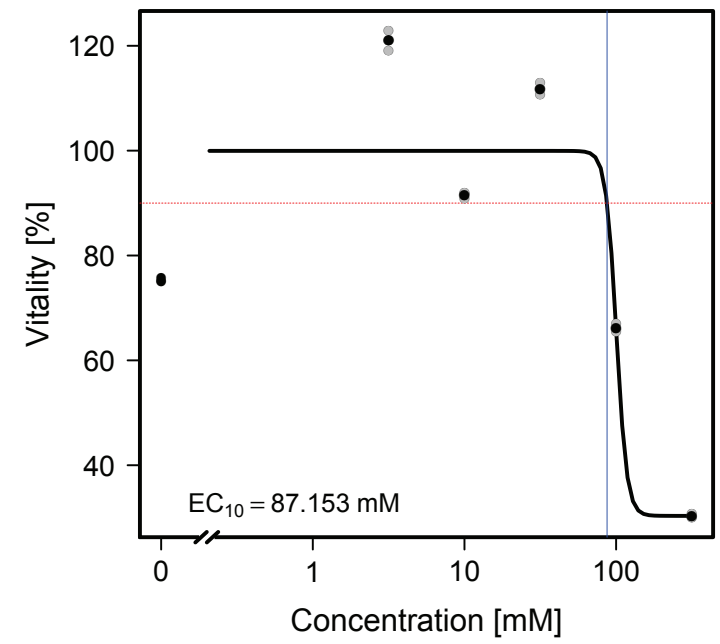

Hydroxyzine  
Experiment 1

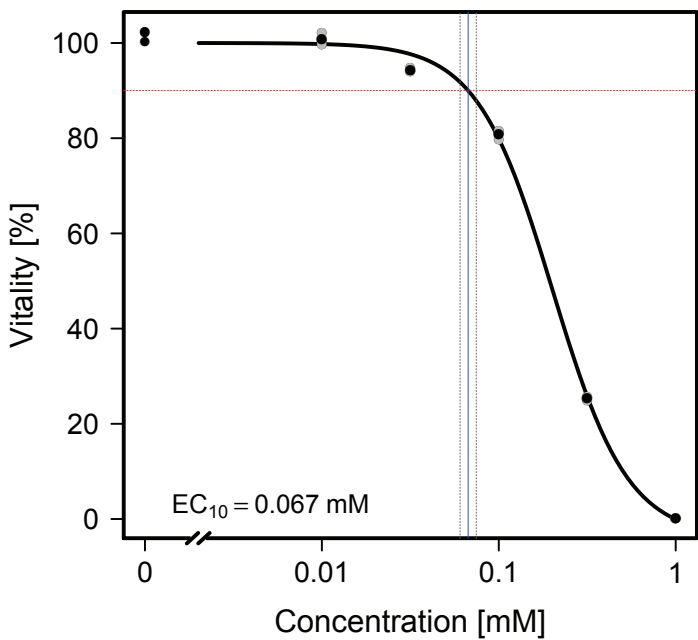

Hydroxyzine  
Experiment 2

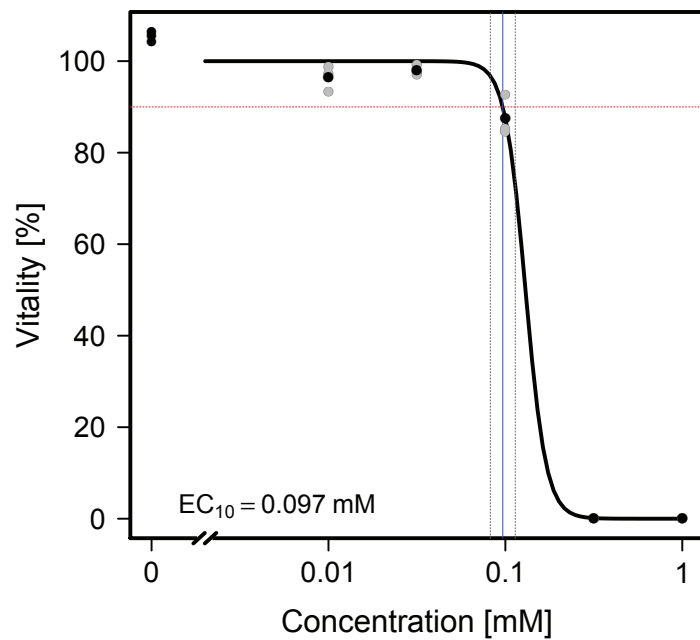

Hydroxyzine  
Experiment 3

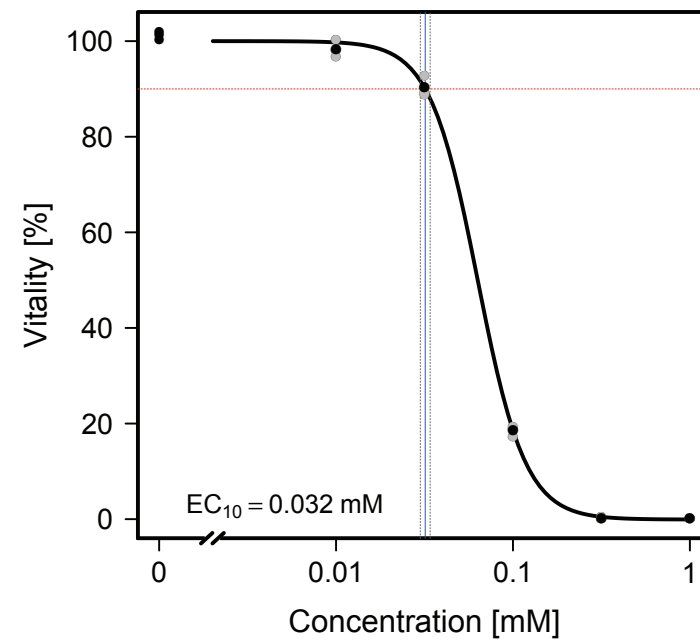

Isoniazid  
Experiment 1

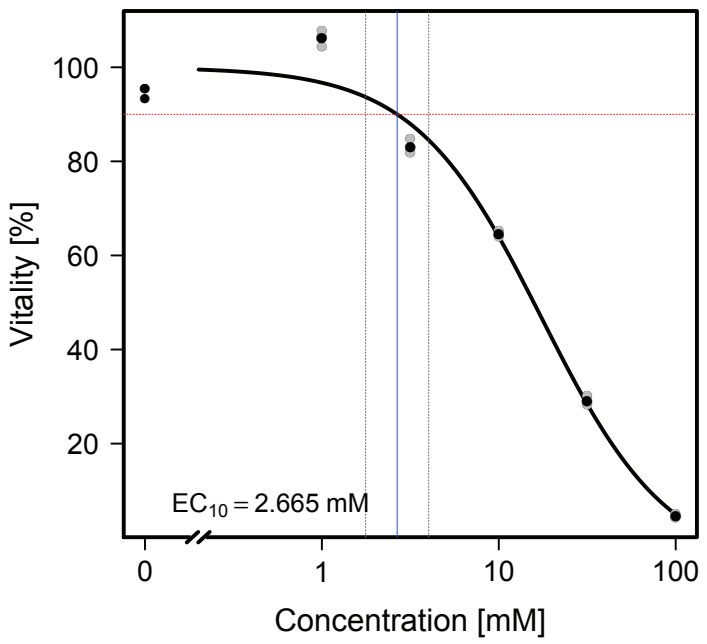

Isoniazid  
Experiment 2

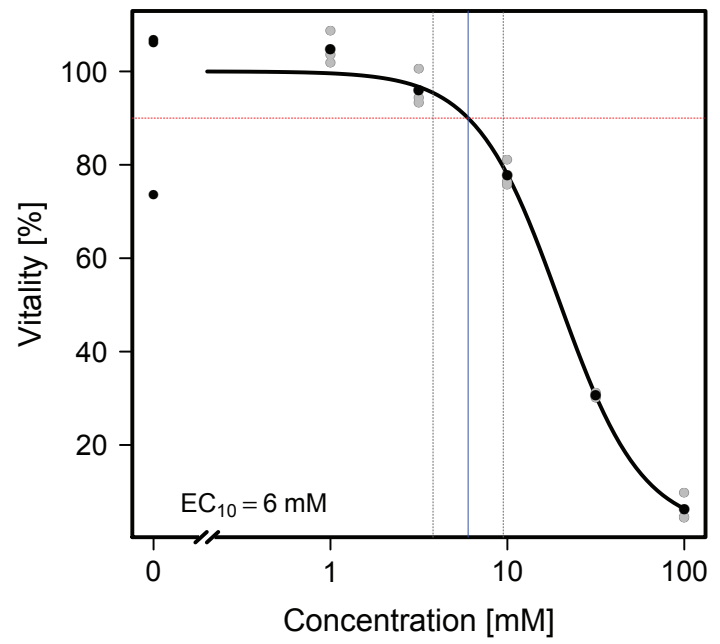

Isoniazid  
Experiment 3

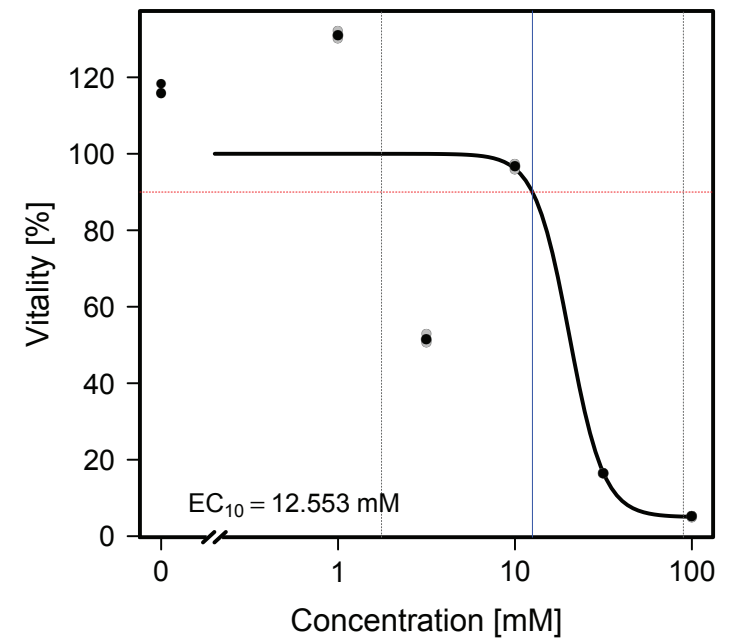

**Ketoconazole**  
Experiment 1

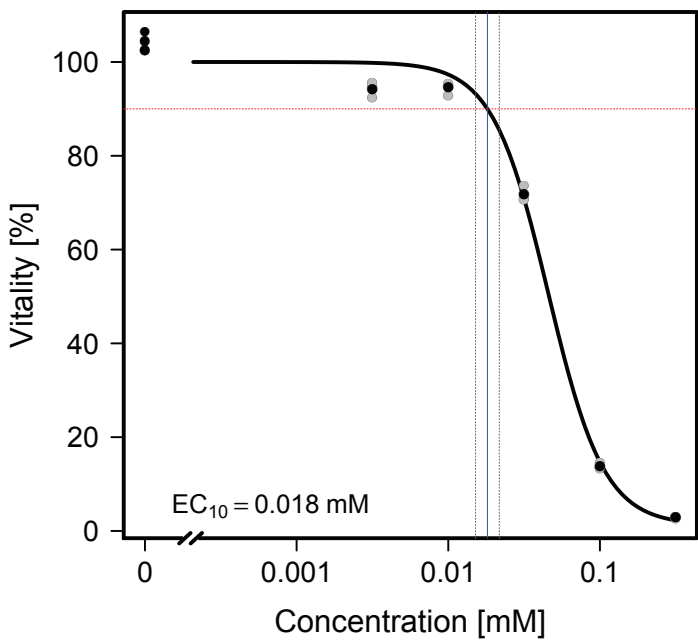

**Ketoconazole**  
Experiment 2

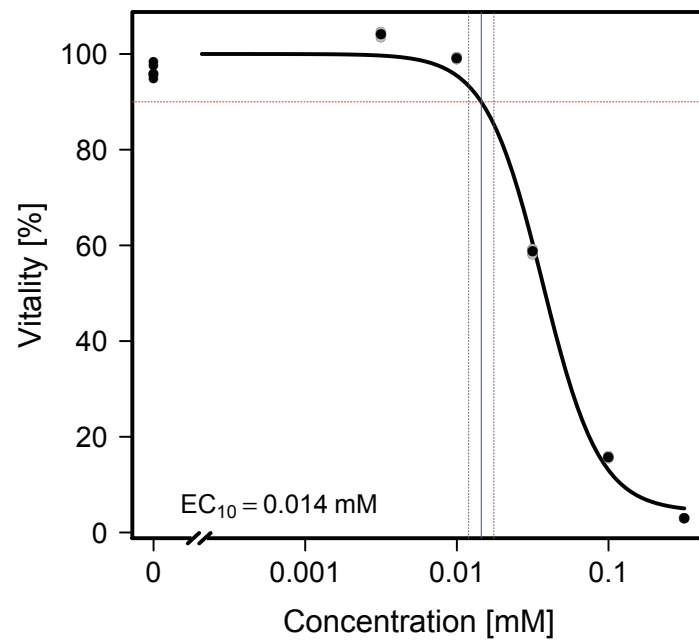

**Ketoconazole**  
Experiment 3

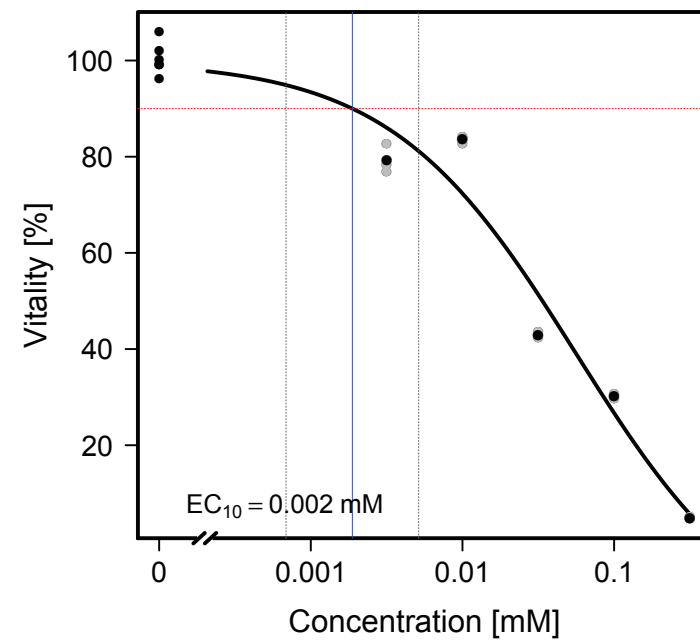

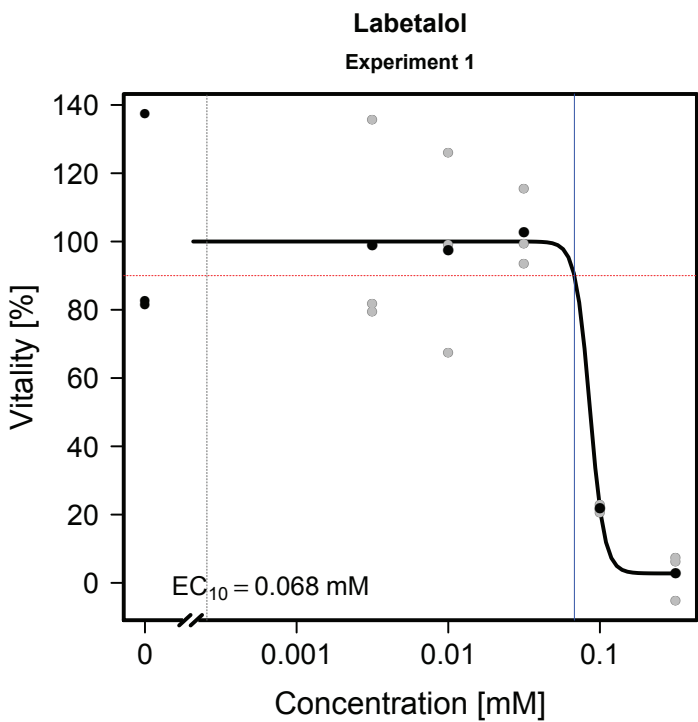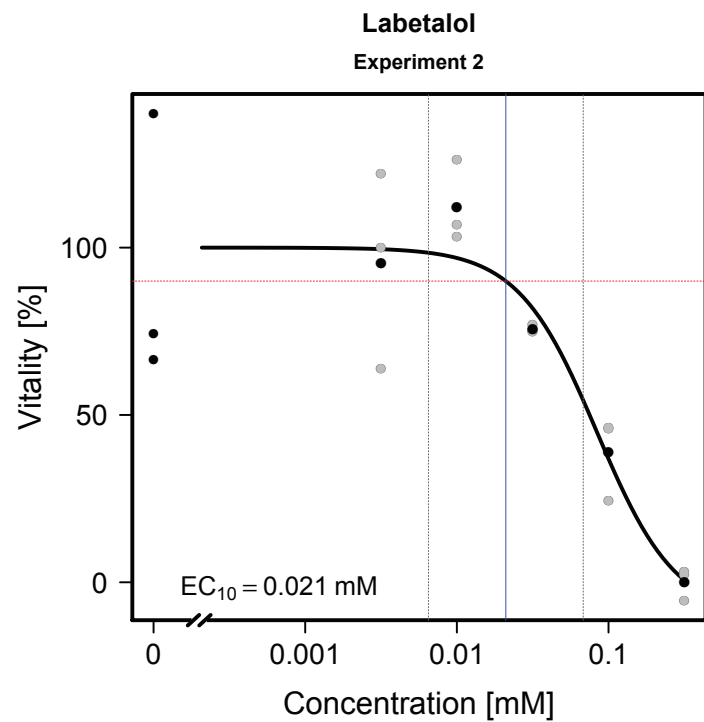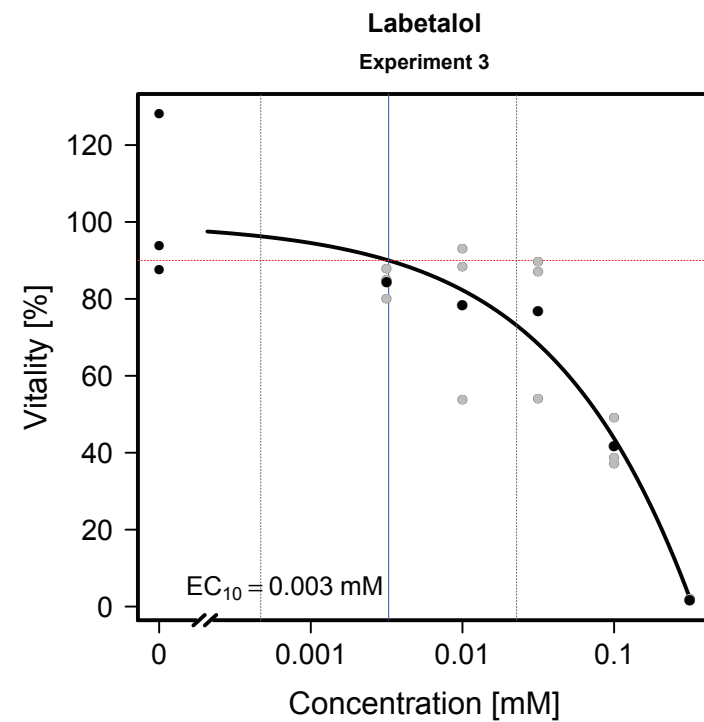

Levofloxacin  
Experiment 1

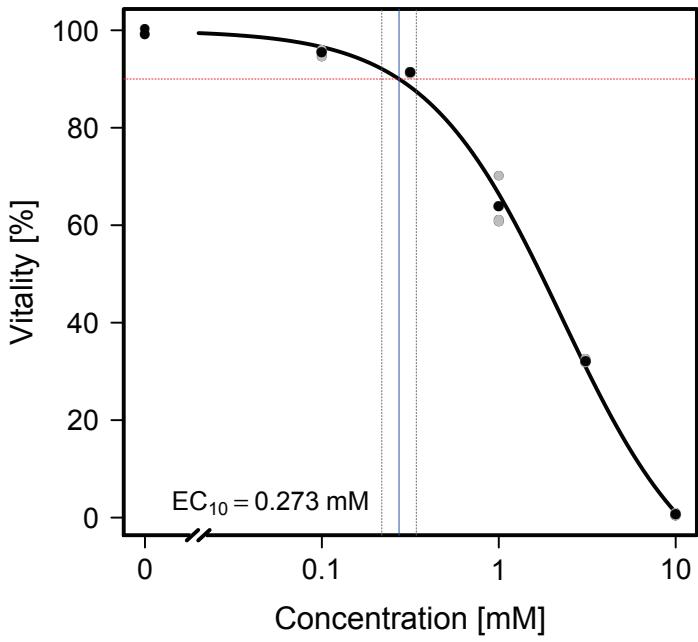

Levofloxacin  
Experiment 2

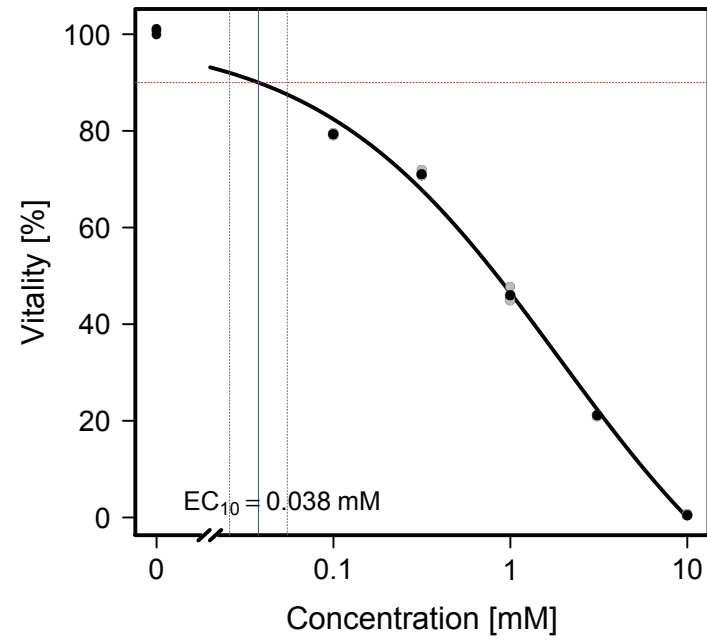

Levofloxacin  
Experiment 3

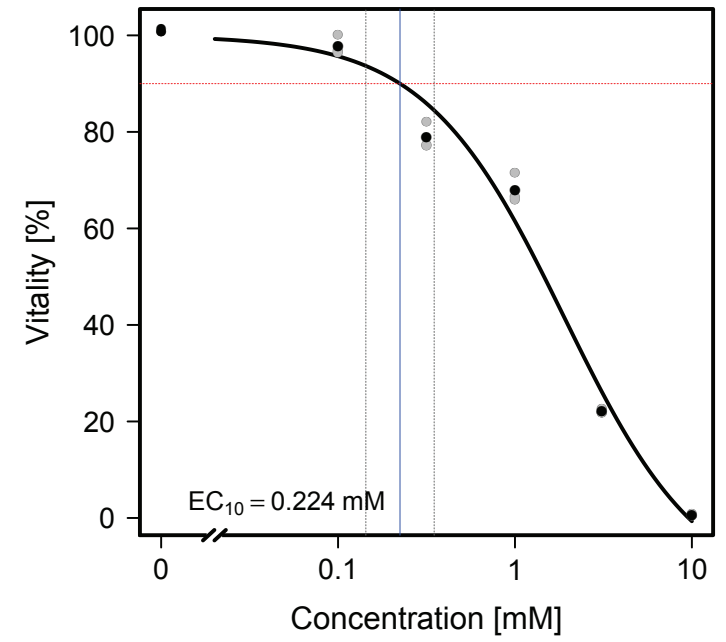

**Melatonin**  
Experiment 1

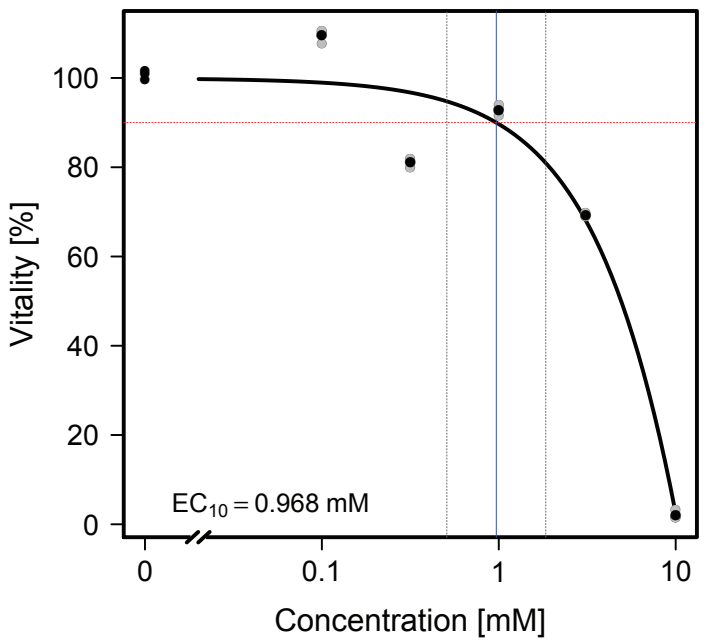

**Melatonin**  
Experiment 2

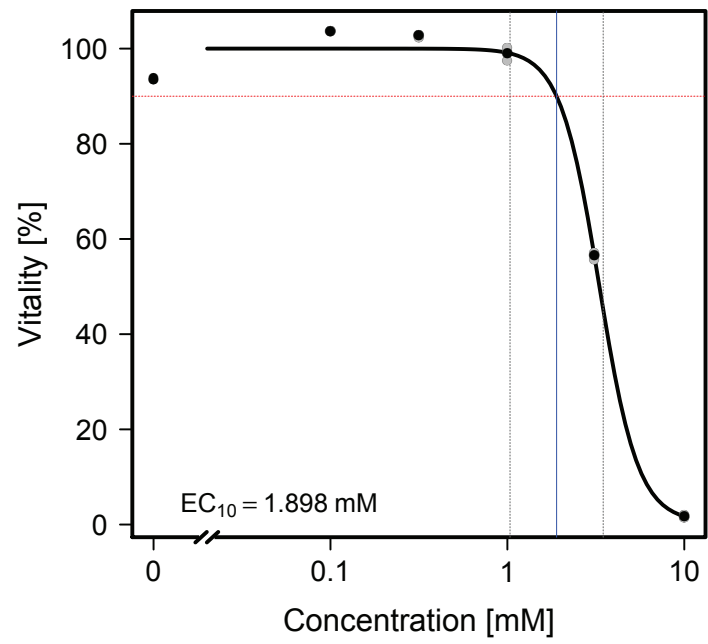

**Melatonin**  
Experiment 3

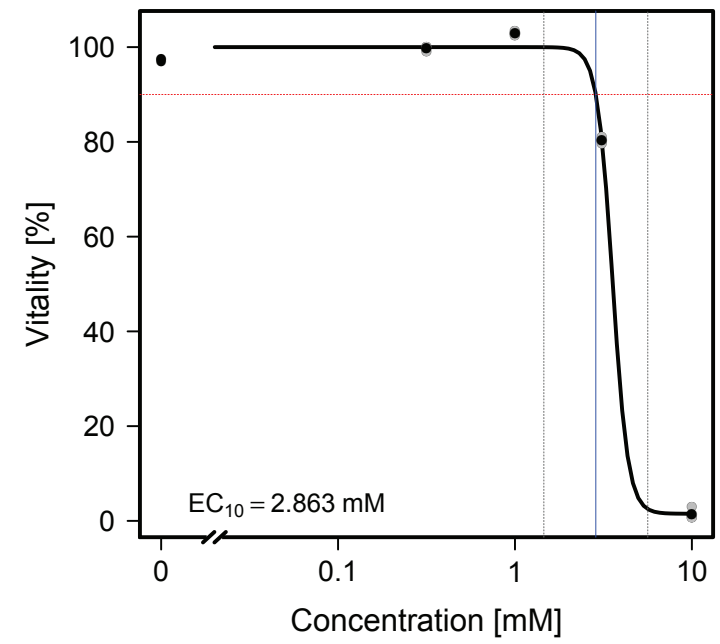

**Methylparabene**  
Experiment 1

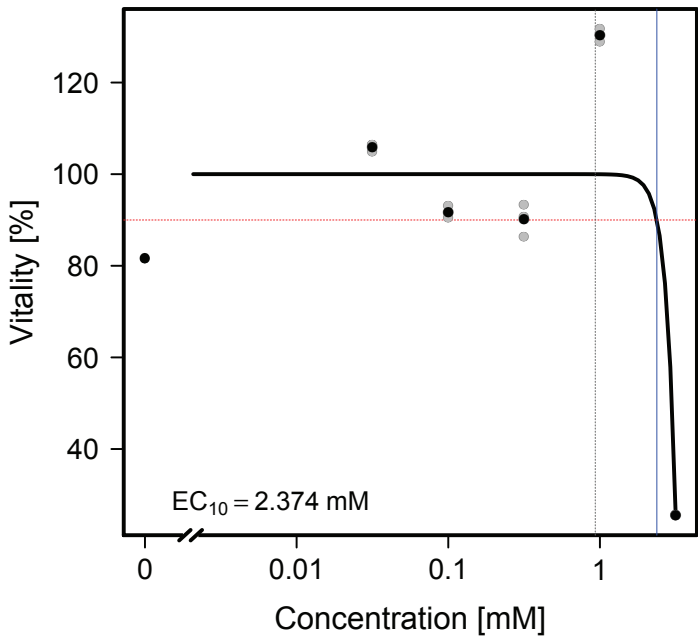

**Methylparabene**  
Experiment 2

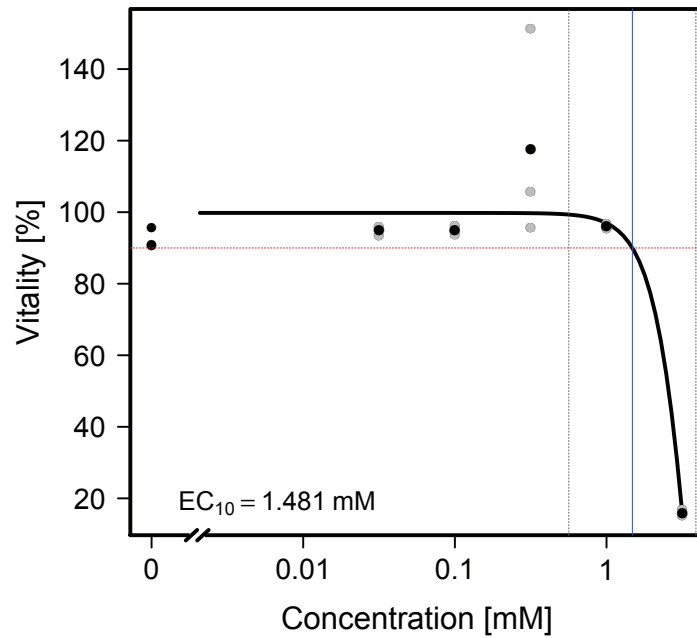

**Methylparabene**  
Experiment 3

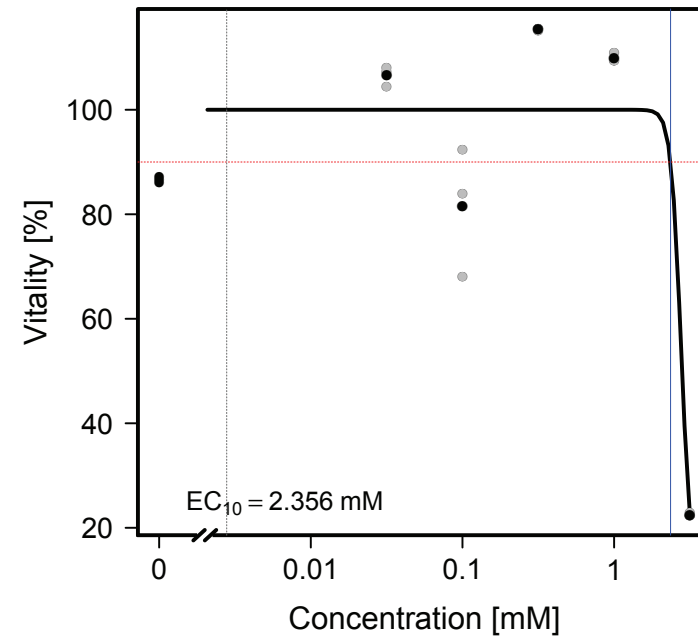

### N-Acetylcysteine

Experiment 1

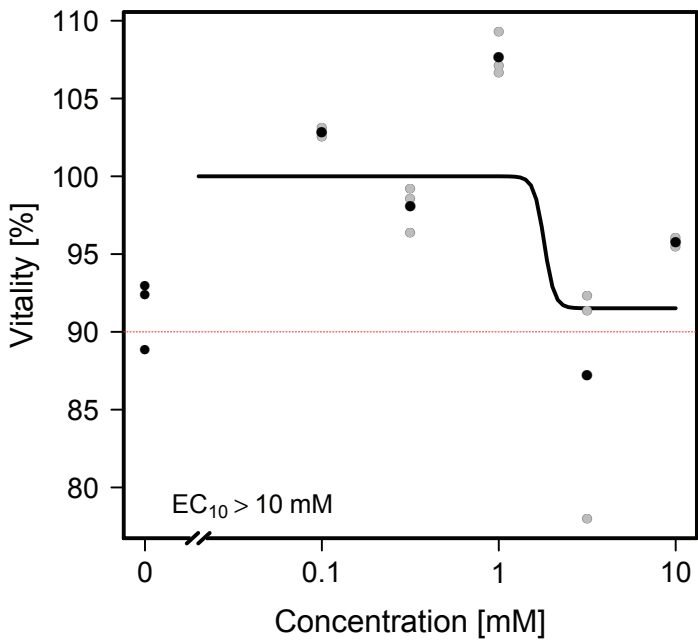

### N-Acetylcysteine

Experiment 2

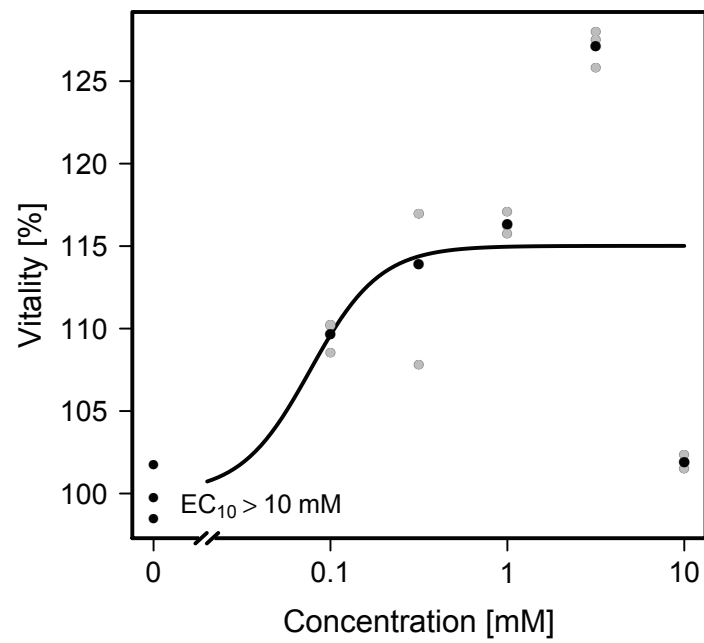

### N-Acetylcysteine

Experiment 3

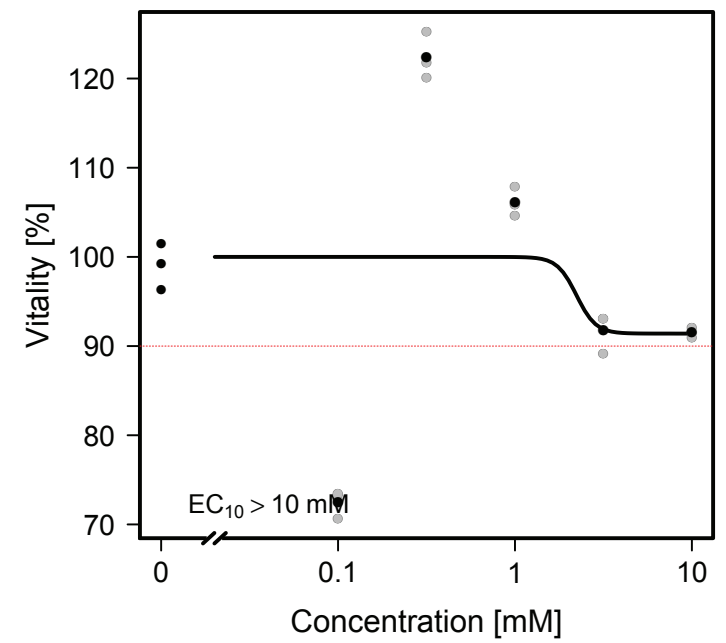

Nitrofurantoin  
Experiment 1

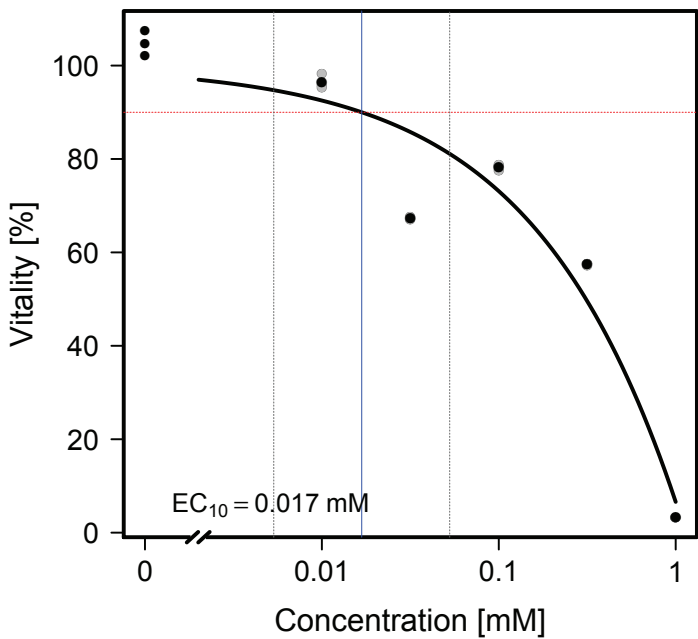

Nitrofurantoin  
Experiment 2

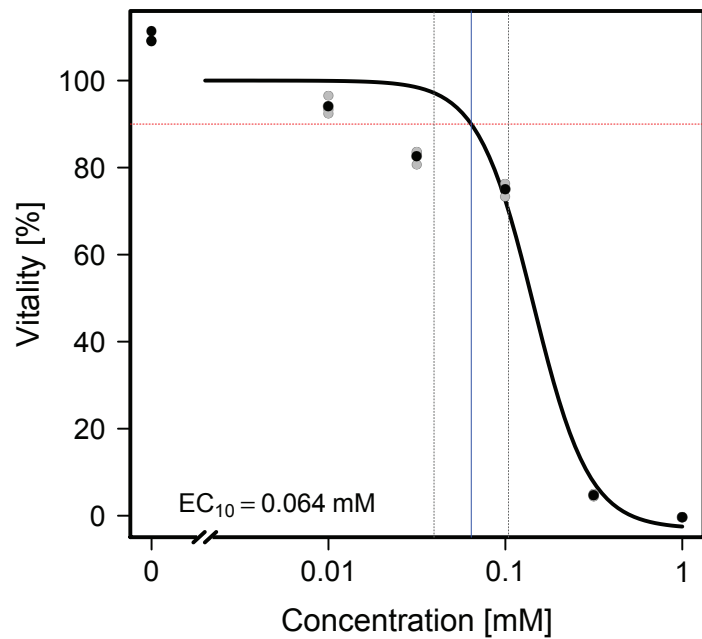

Nitrofurantoin  
Experiment 3

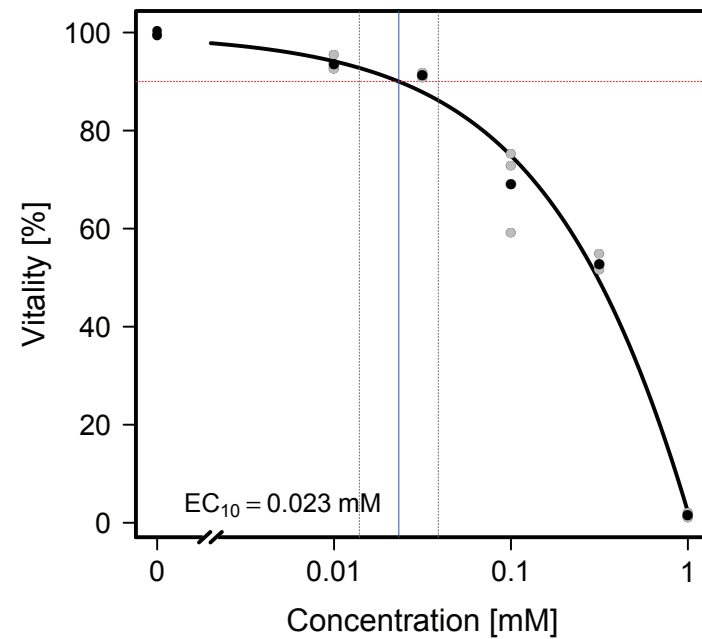

**Nimesulide**  
Experiment 1

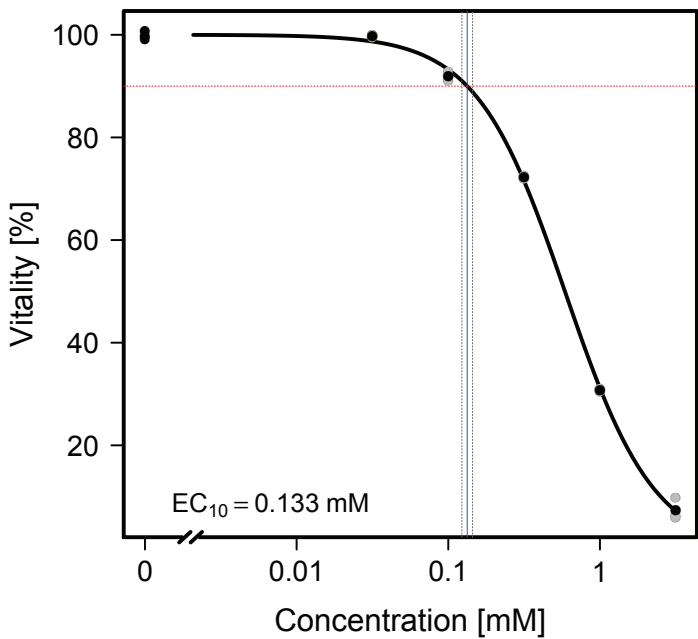

**Nimesulide**  
Experiment 2

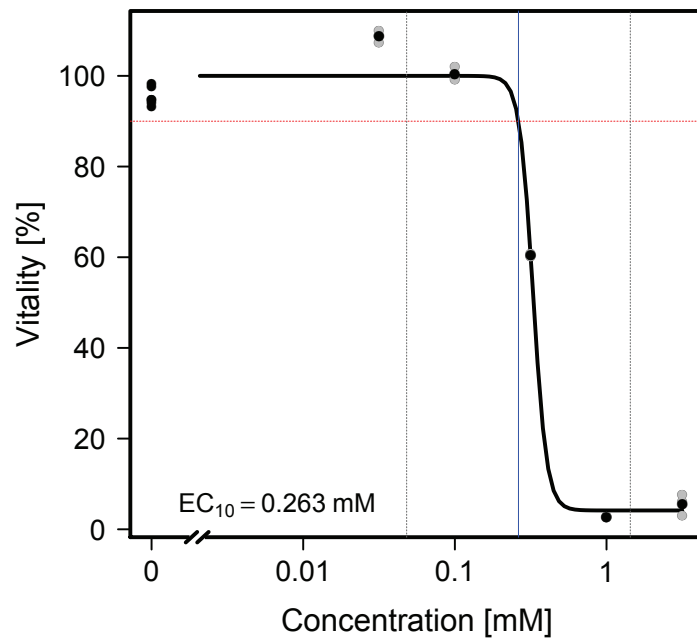

**Nimesulide**  
Experiment 3

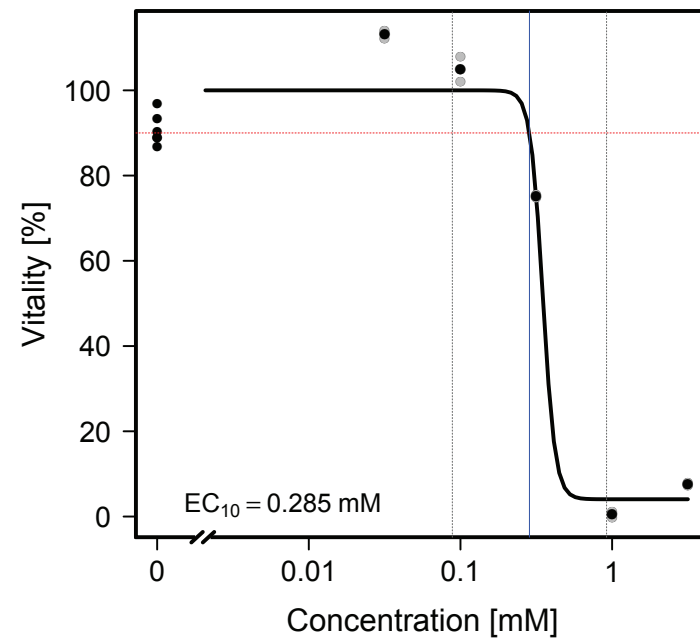

### Phenylbutazone

Experiment 1

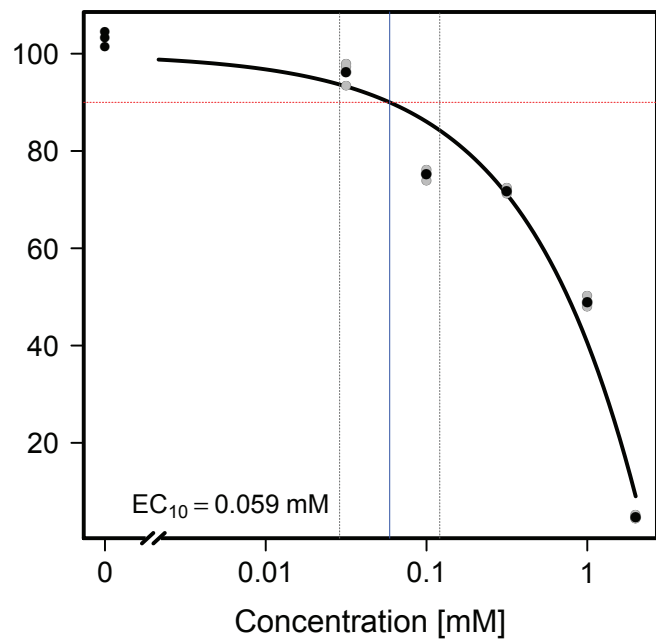

### Phenylbutazone

Experiment 2

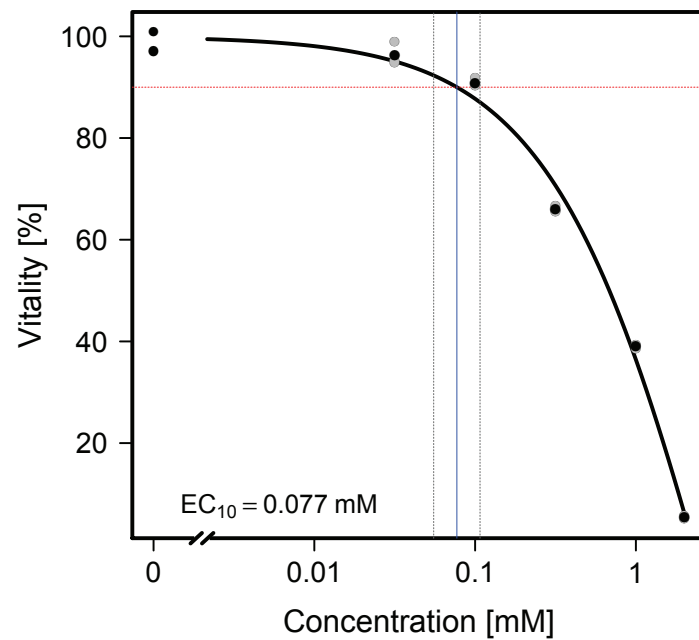

### Phenylbutazone

Experiment 3

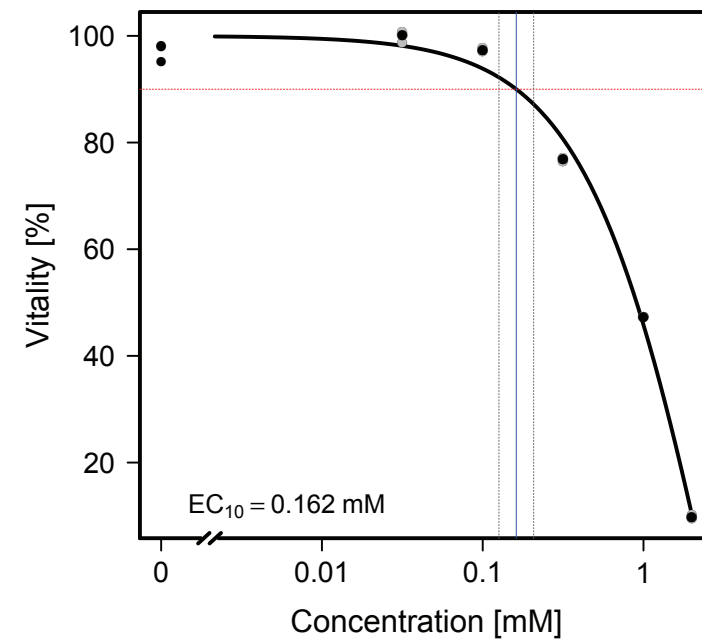

Promethazine  
Experiment 1

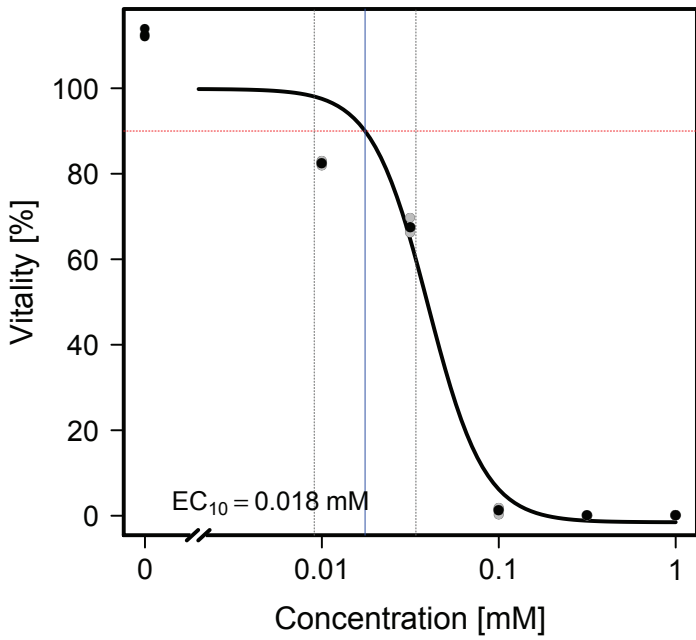

Promethazine  
Experiment 2

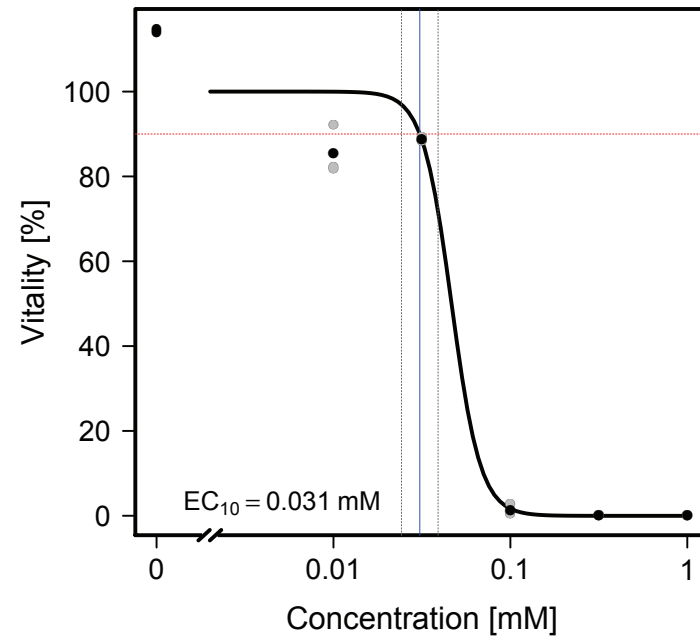

Promethazine  
Experiment 3

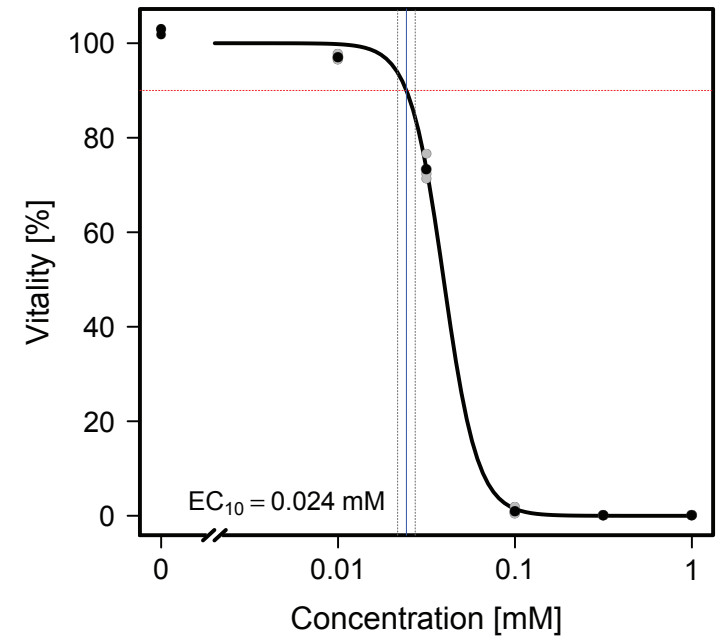

**Propranolol**  
Experiment 1

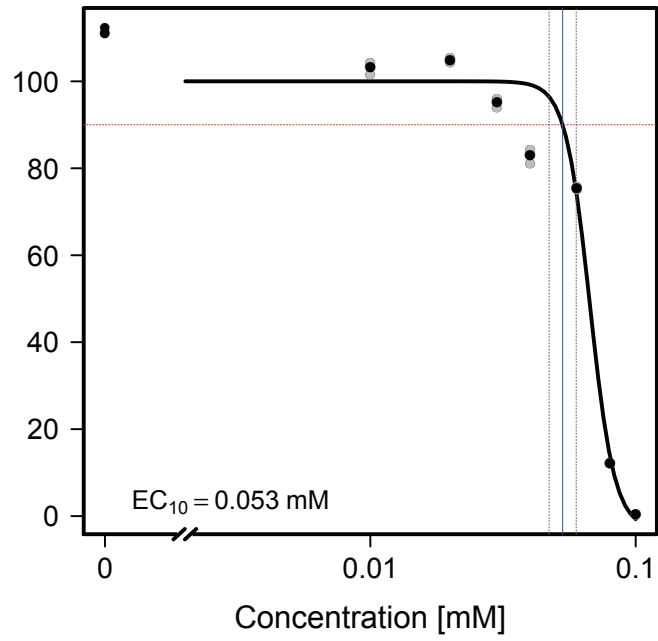

**Propranolol**  
Experiment 2

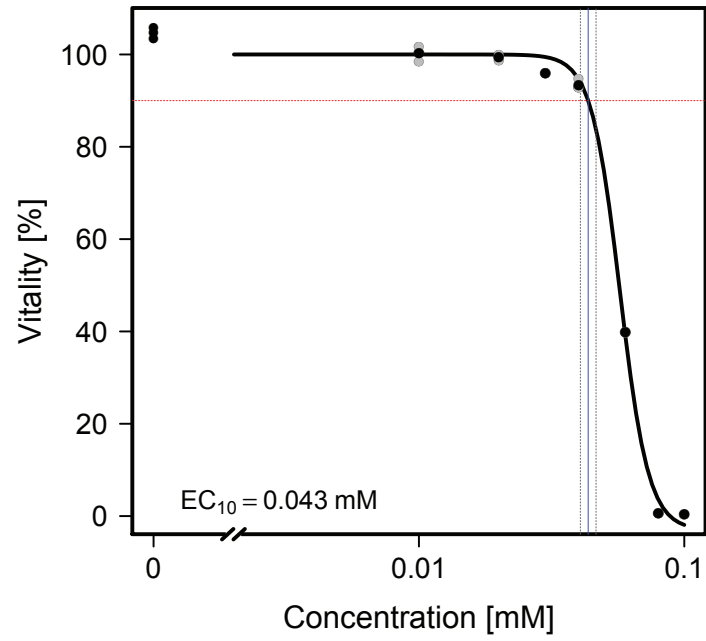

**Propranolol**  
Experiment 3

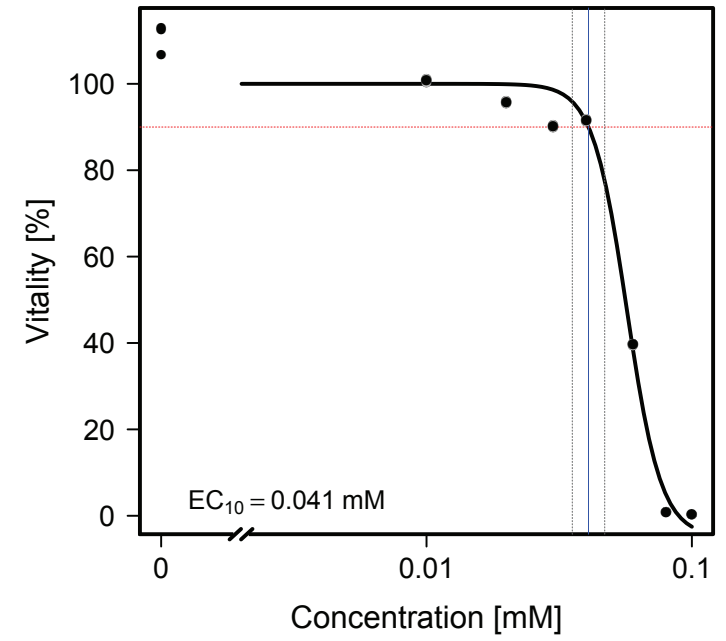

**Rifampicin**  
Experiment 1

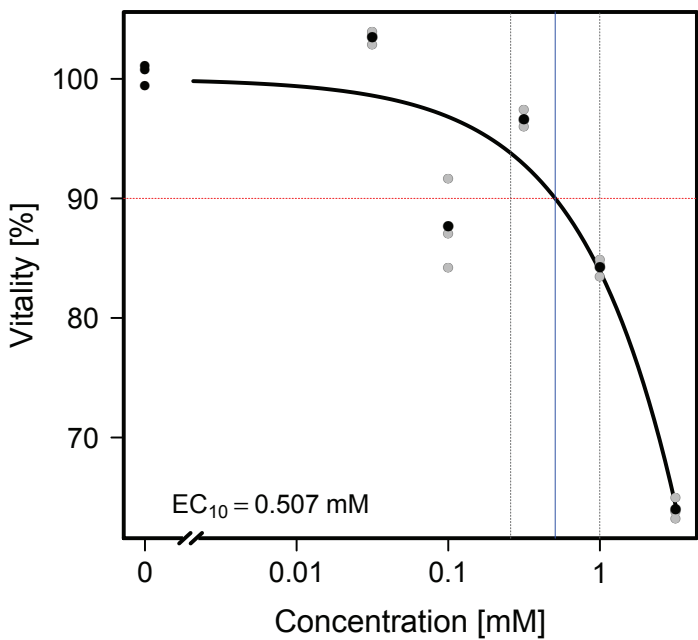

**Rifampicin**  
Experiment 2

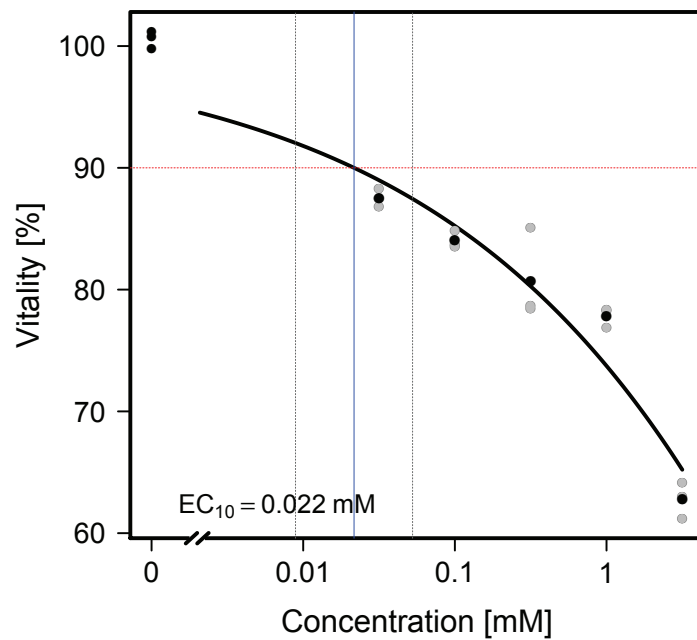

**Rifampicin**  
Experiment 3

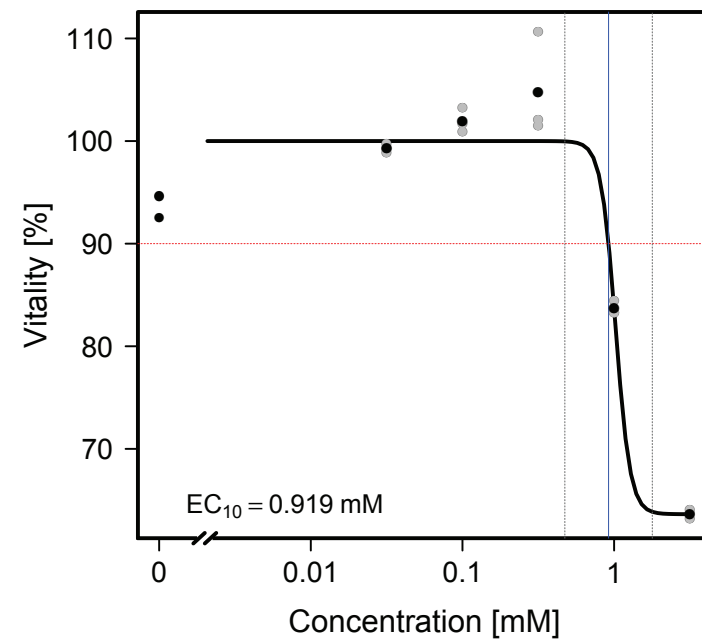

**Triclosan**  
Experiment 1

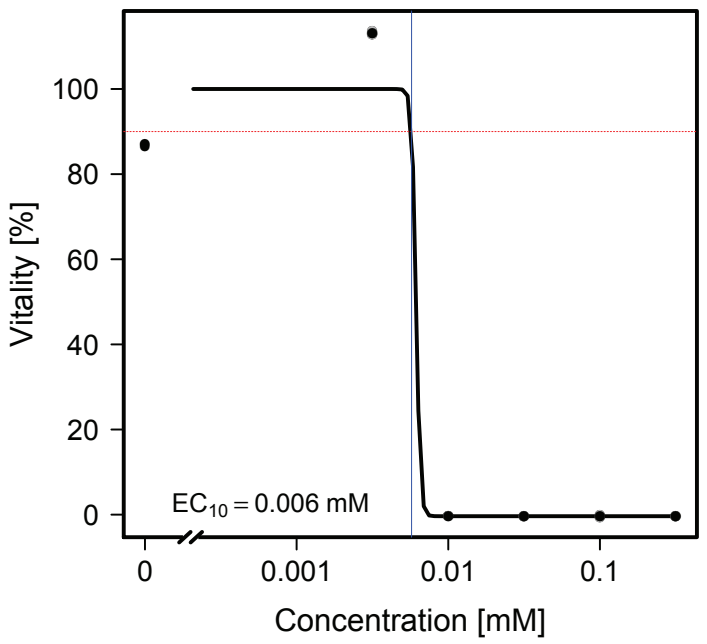

**Triclosan**  
Experiment 2

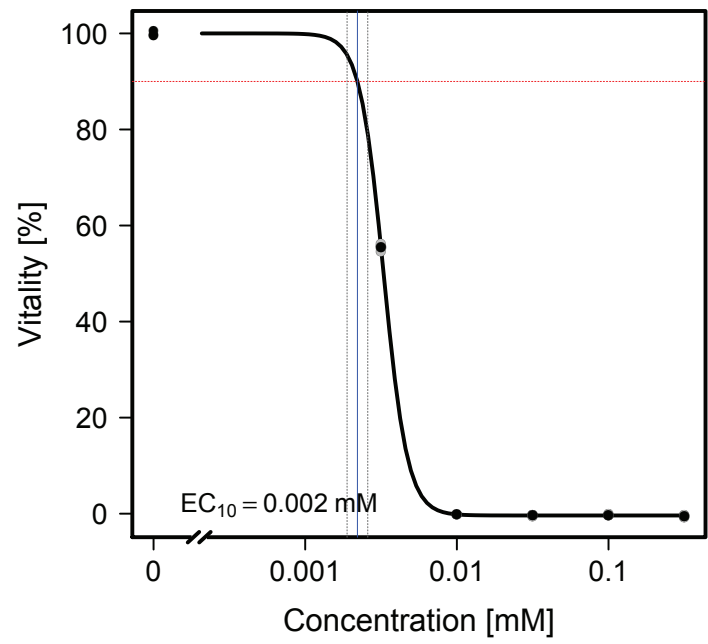

**Triclosan**  
Experiment 3

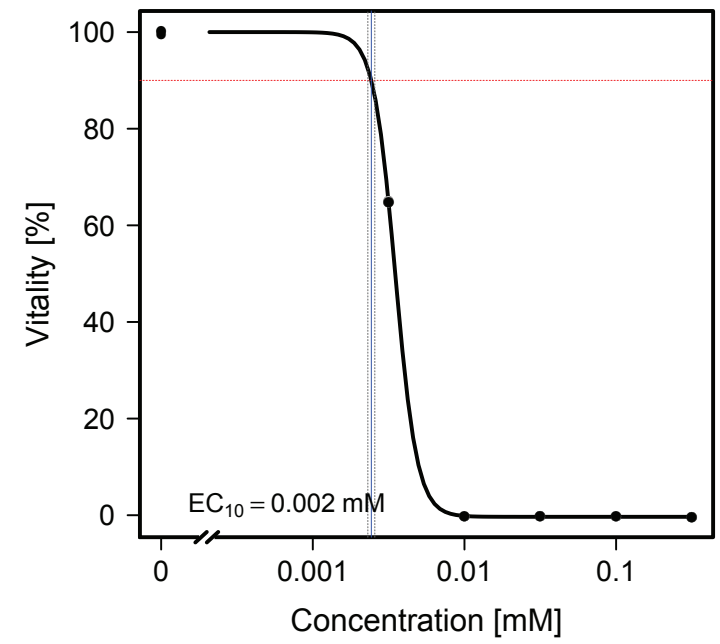

**Vitamin C**  
Experiment 1

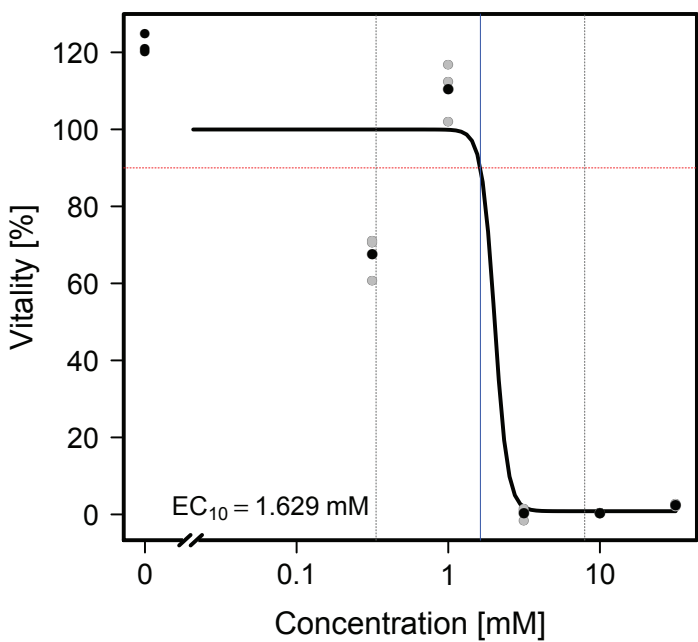

**Vitamin C**  
Experiment 2

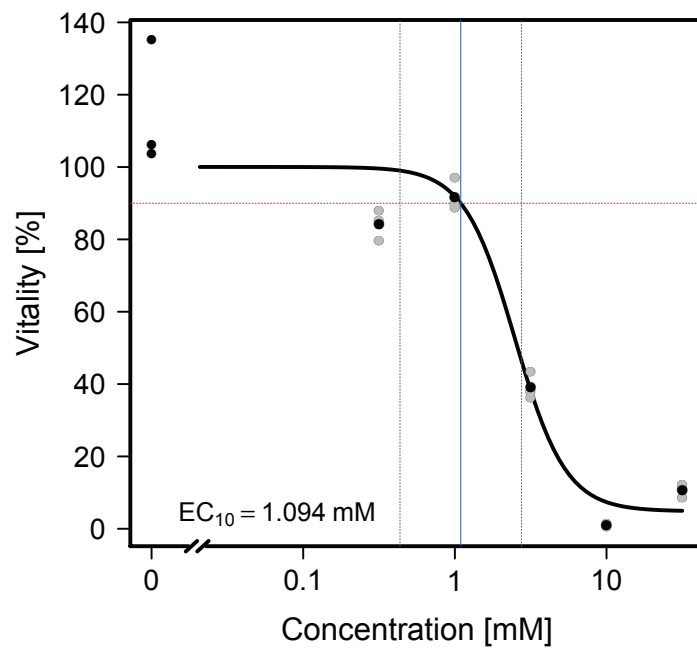

**Vitamin C**  
Experiment 3

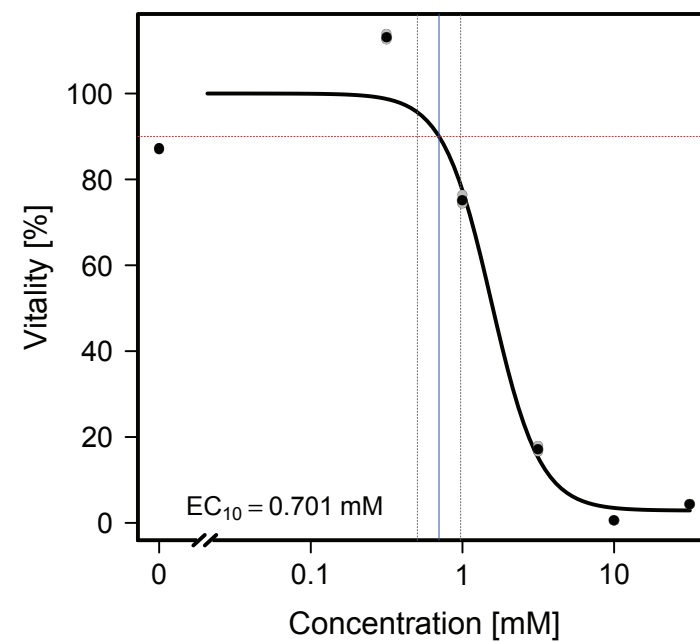

Valproic acid  
Experiment 1

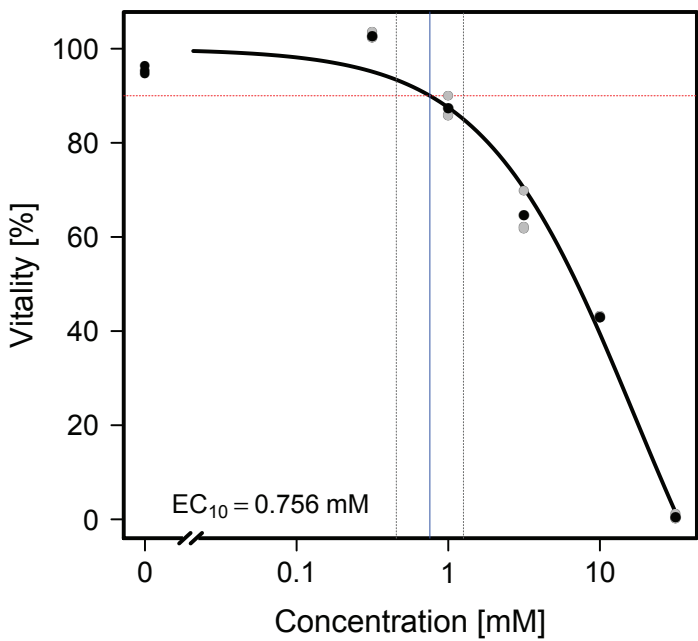

Valproic acid  
Experiment 2

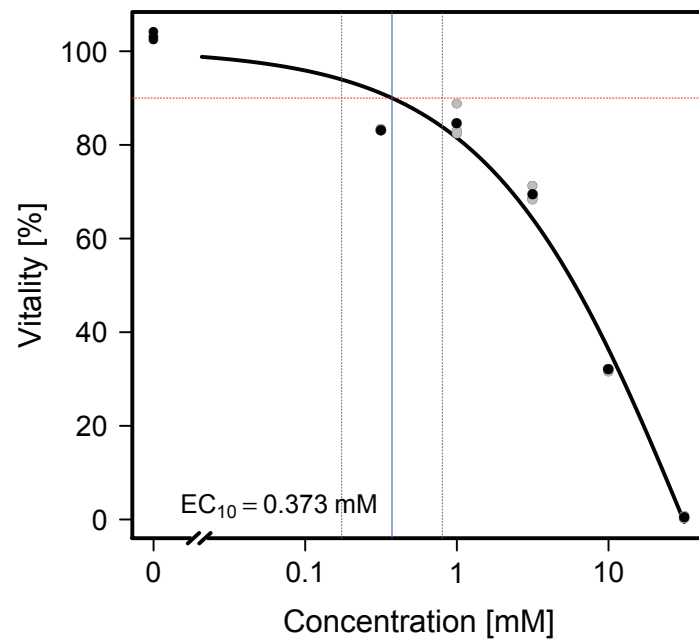

Valproic acid  
Experiment 3

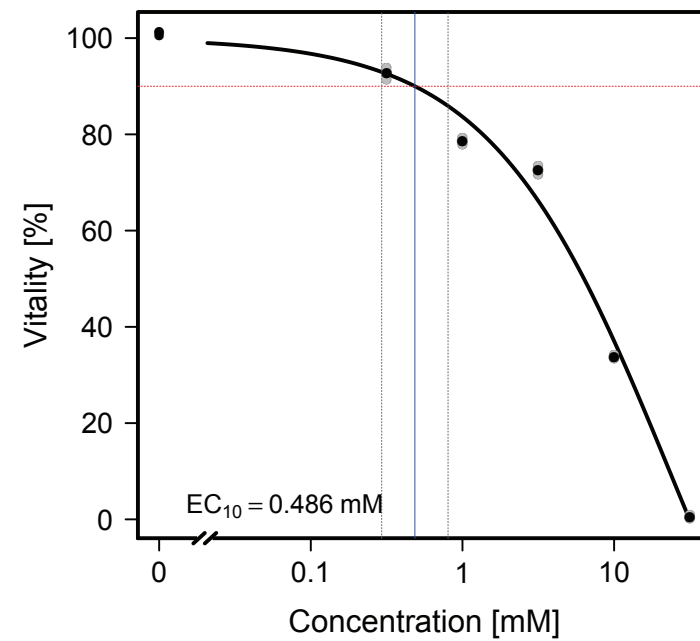

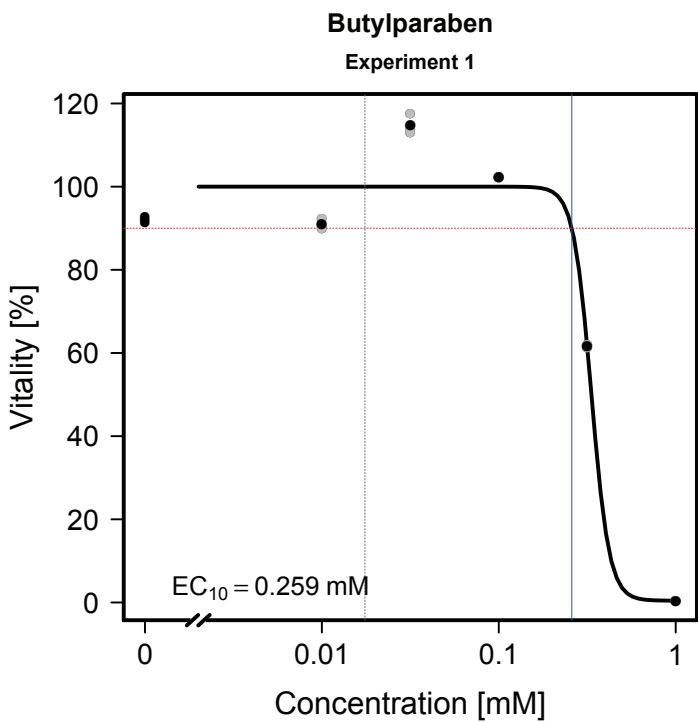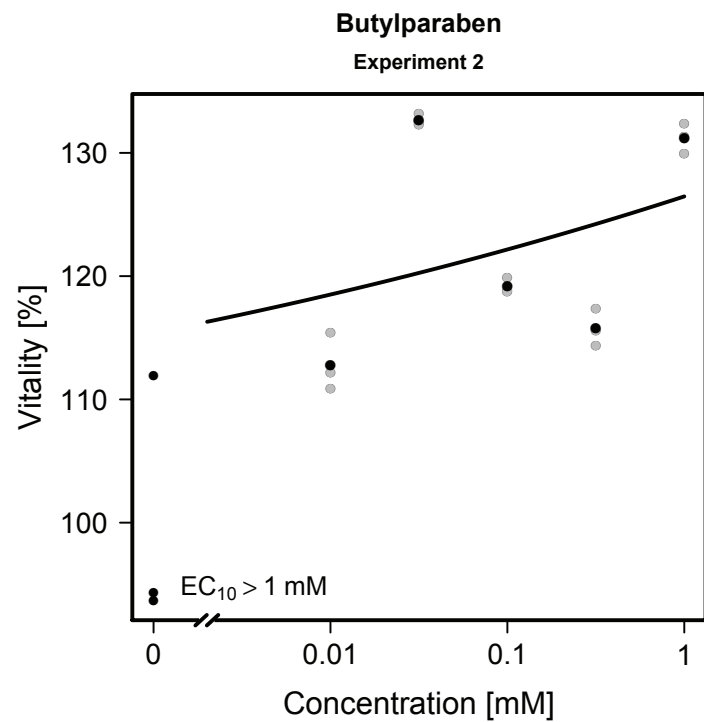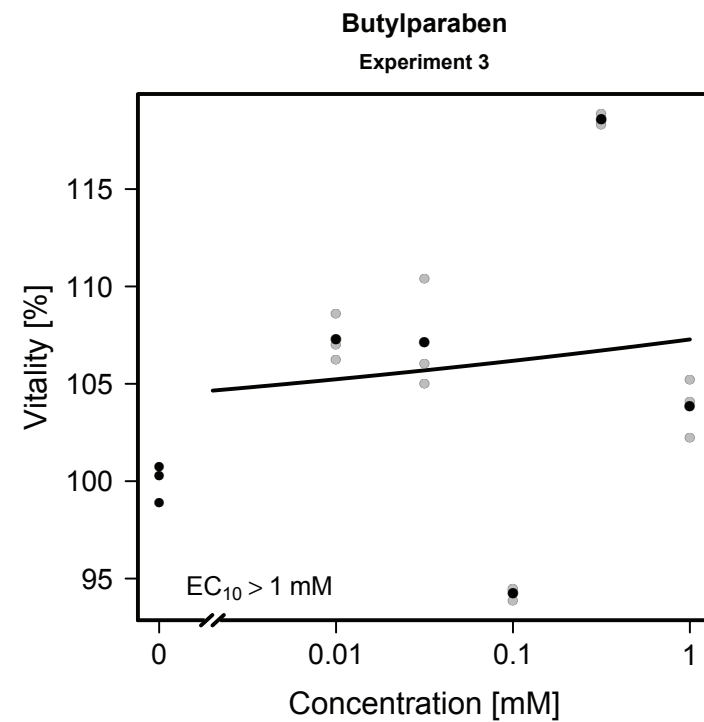

Ethylparaben  
Experiment 1

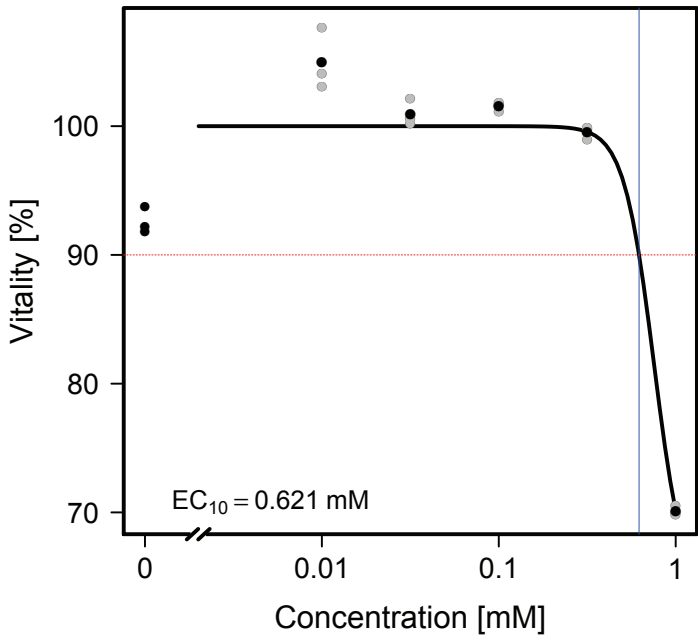

Ethylparaben  
Experiment 2

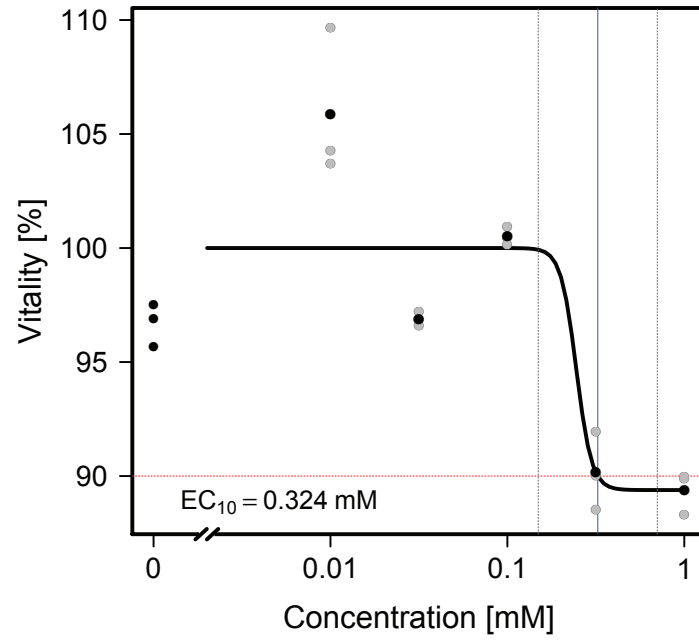

Ethylparaben  
Experiment 3

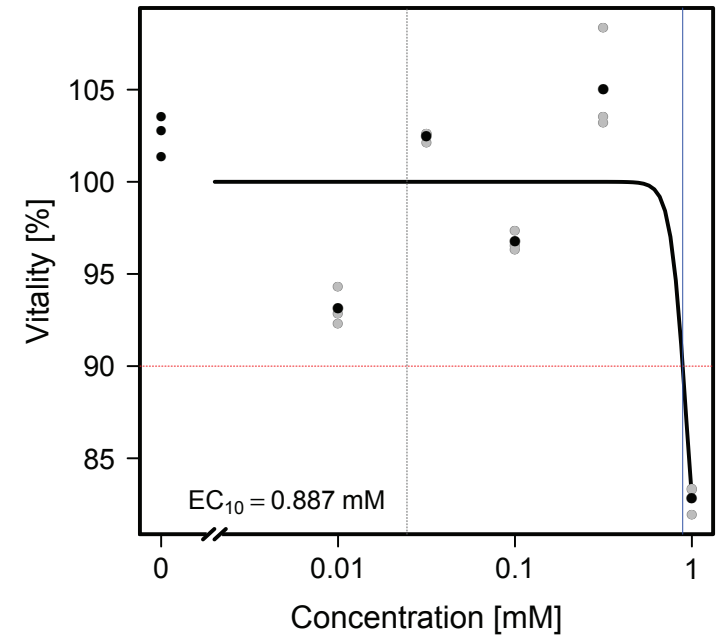

### Isobutylparaben

Experiment 1

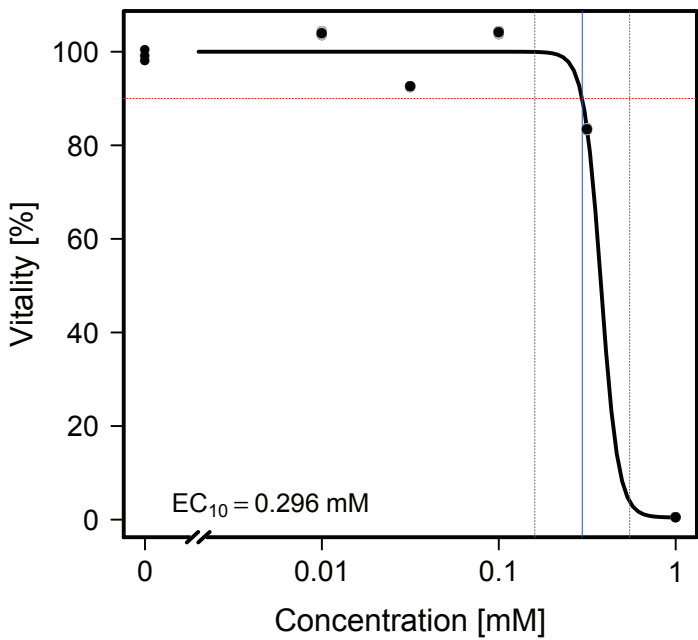

### Isobutylparaben

Experiment 2

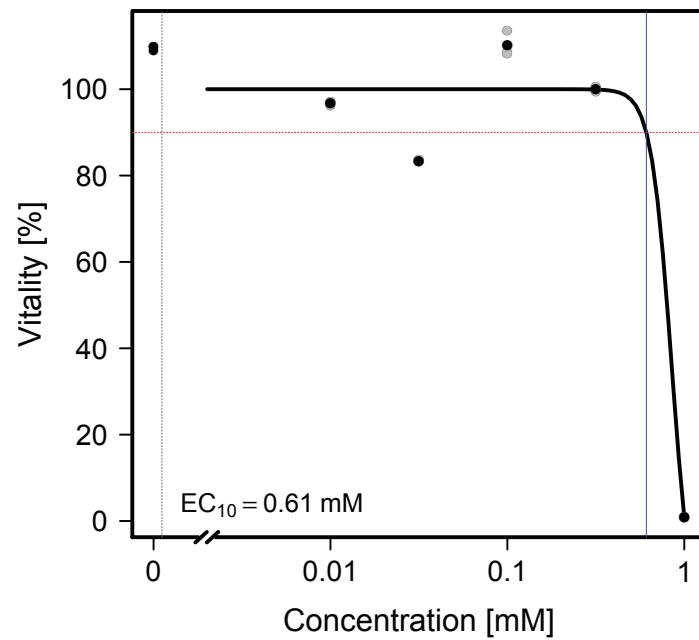

### Isobutylparaben

Experiment 3

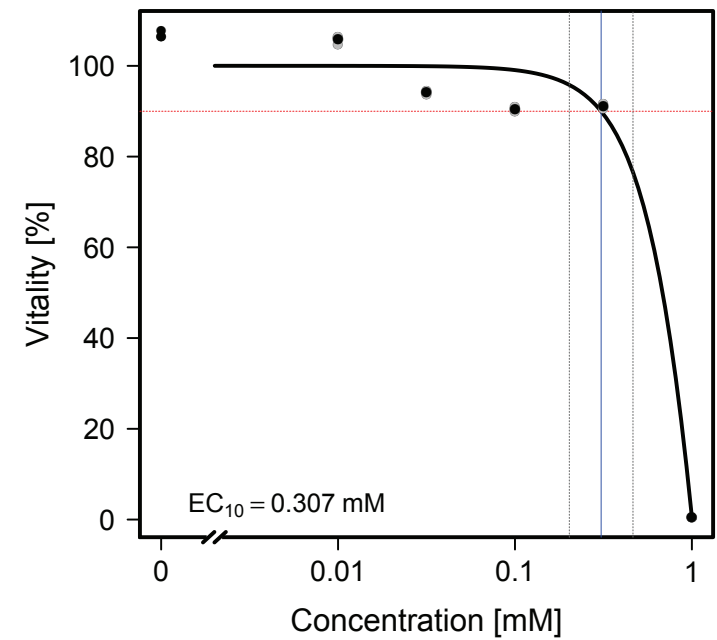

Propylparaben  
Experiment 1

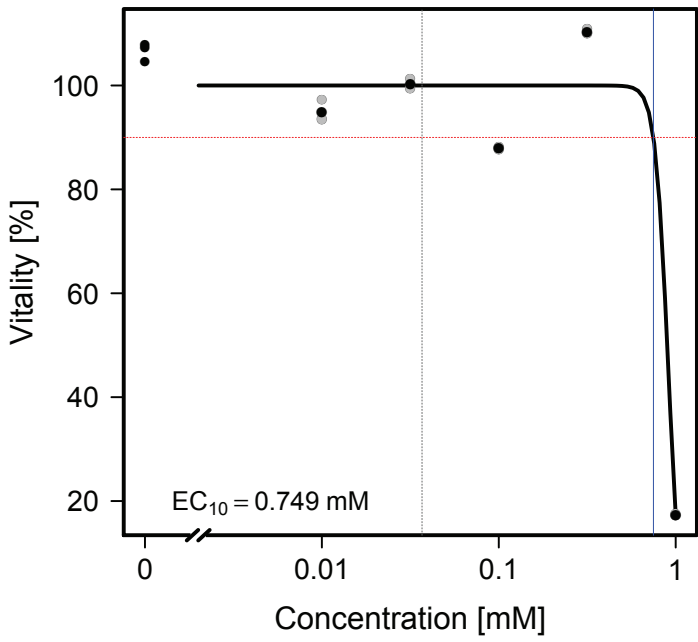

Propylparaben  
Experiment 2

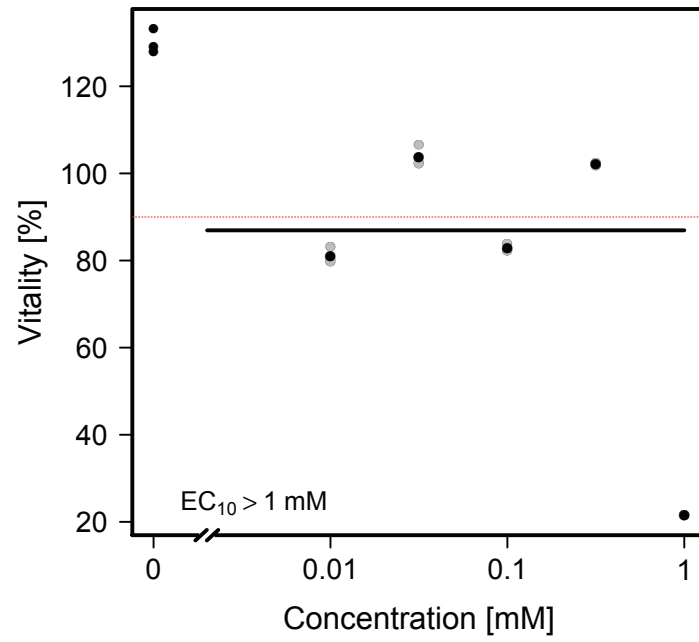

Propylparaben  
Experiment 3

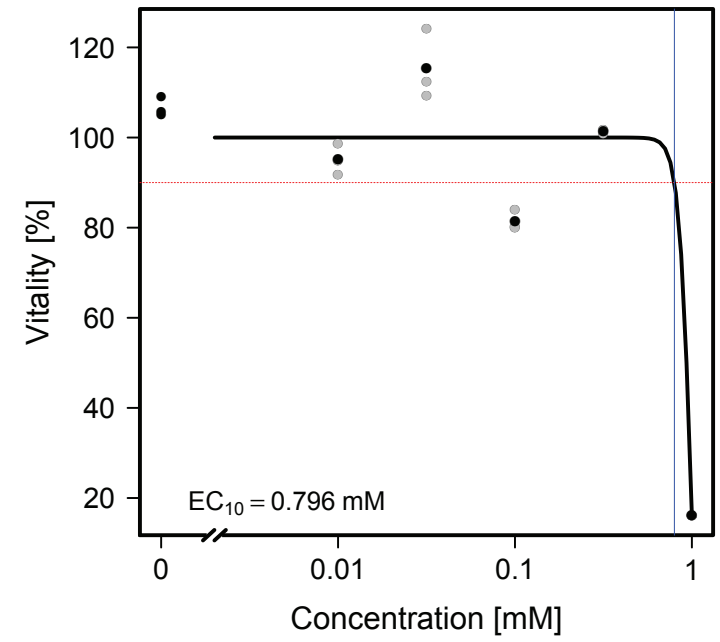

Leflunomide  
Experiment 1

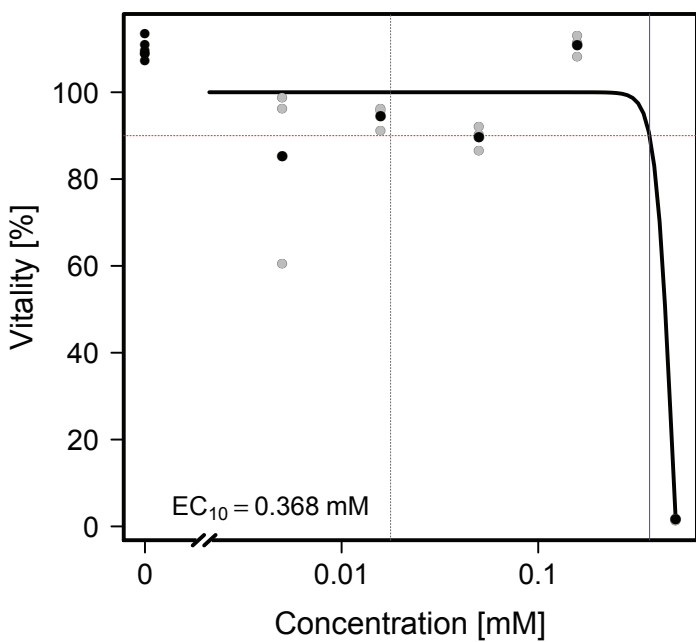

Leflunomide  
Experiment 2

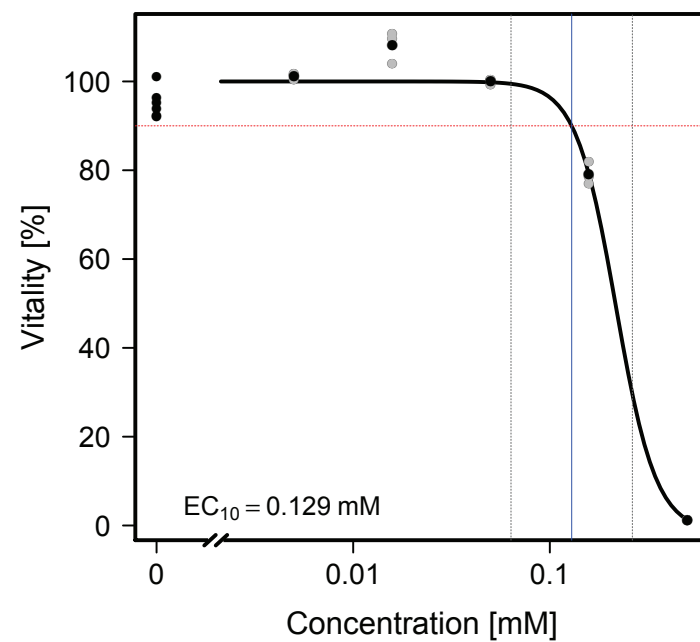

Leflunomide  
Experiment 3

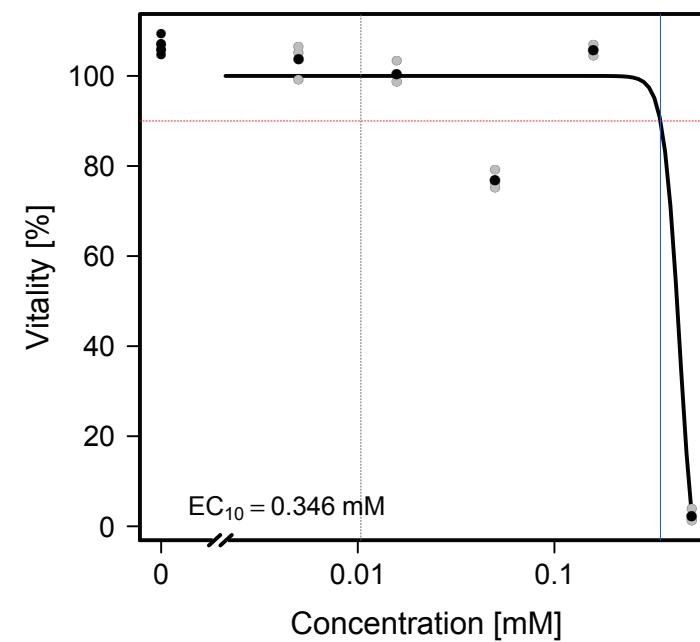

**Nevirapine**  
Experiment 1

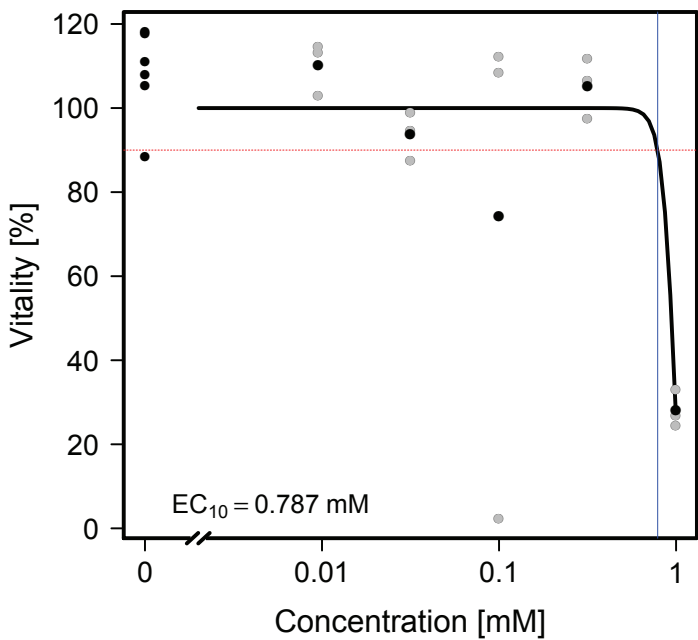

**Nevirapine**  
Experiment 2

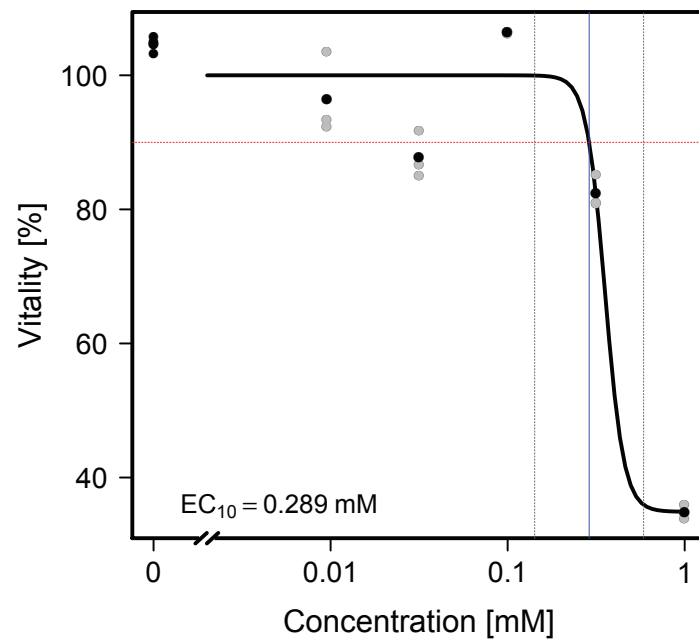

**Nevirapine**  
Experiment 3

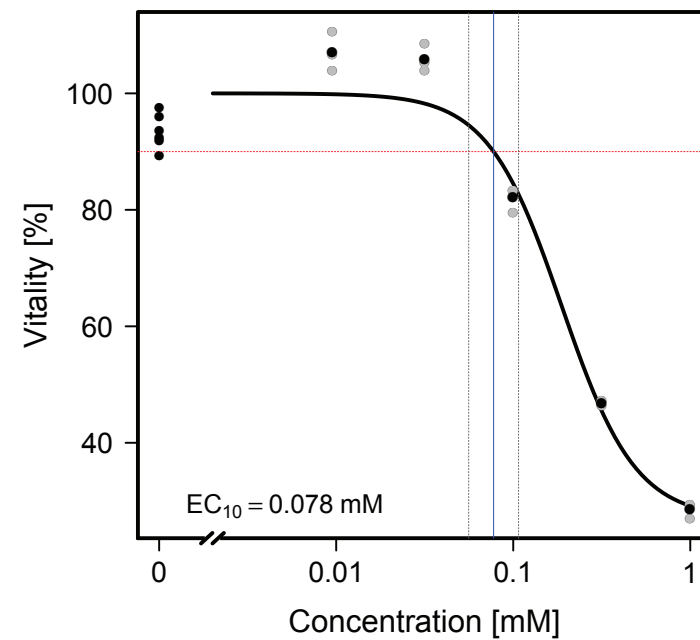

**Tolcapone**  
Experiment 1

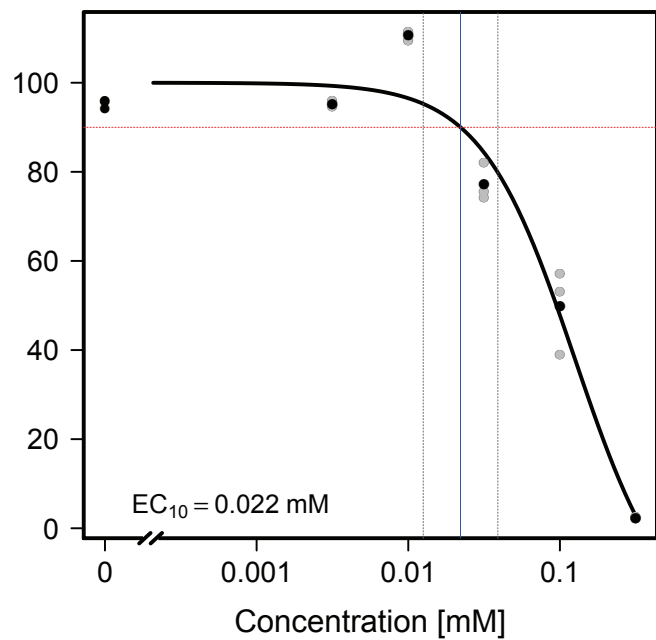

**Tolcapone**  
Experiment 2

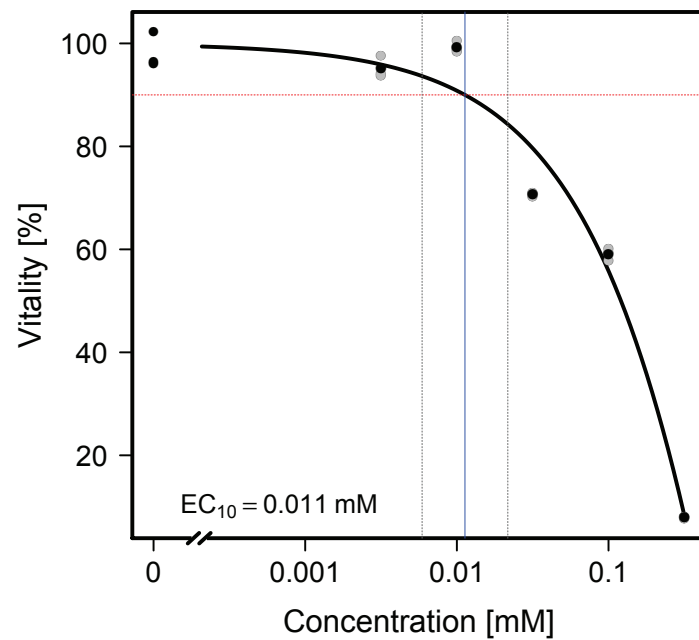

**Tolcapone**  
Experiment 3

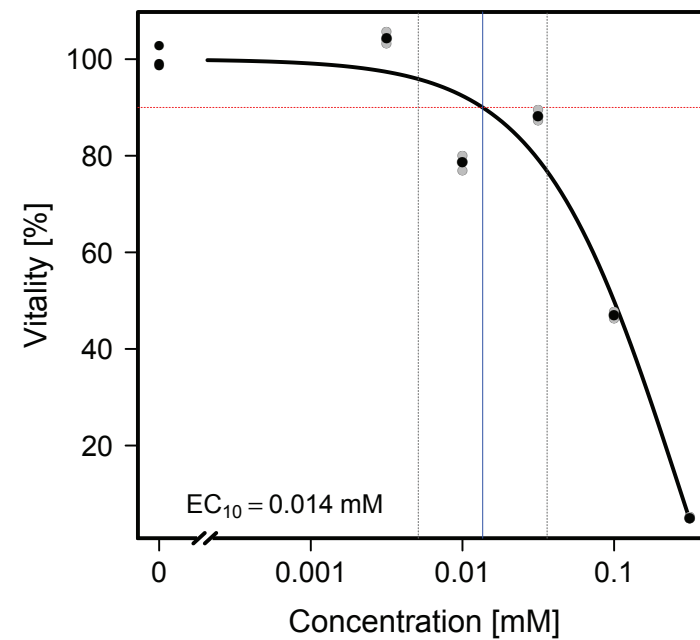

Troglitazone  
Experiment 1

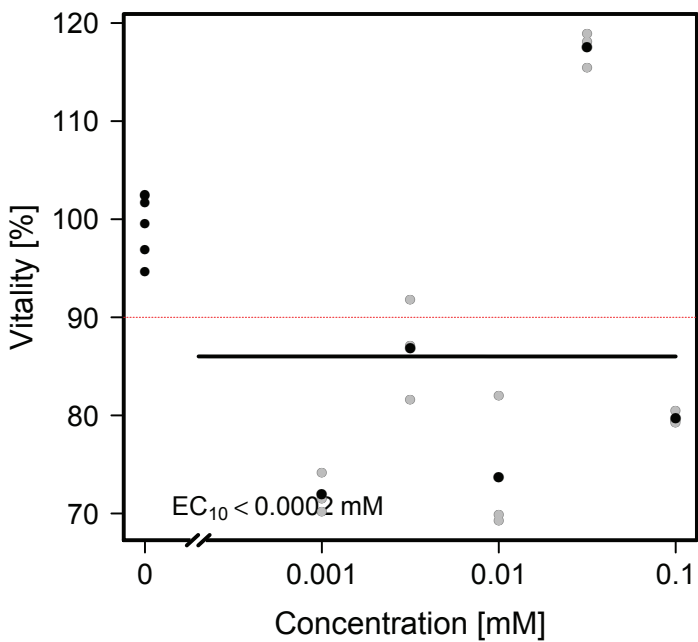

Troglitazone  
Experiment 2

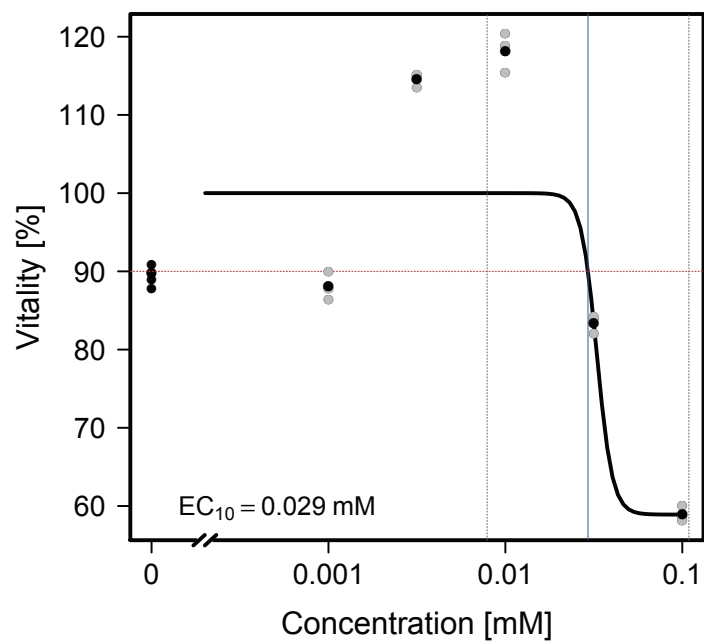

Troglitazone  
Experiment 3

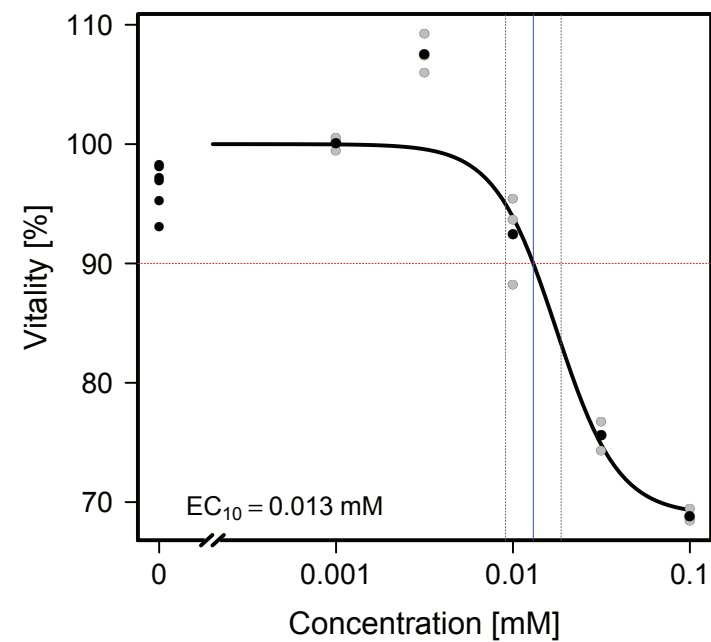

### Pulegone HepG2

Experiment 1

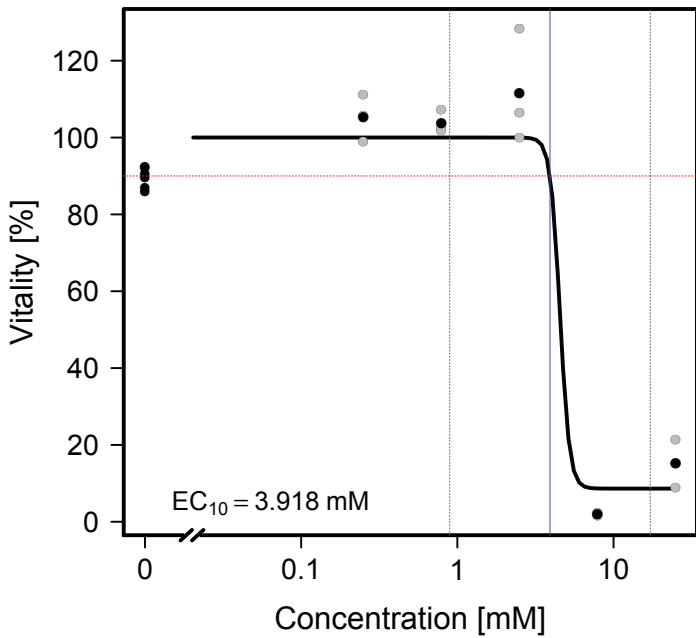

### Pulegone HepG2

Experiment 2

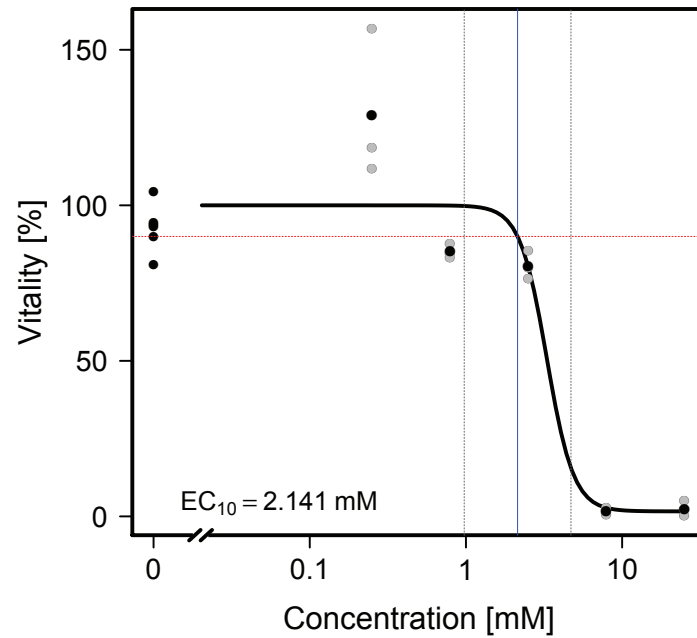

### Pulegone HepG2

Experiment 3

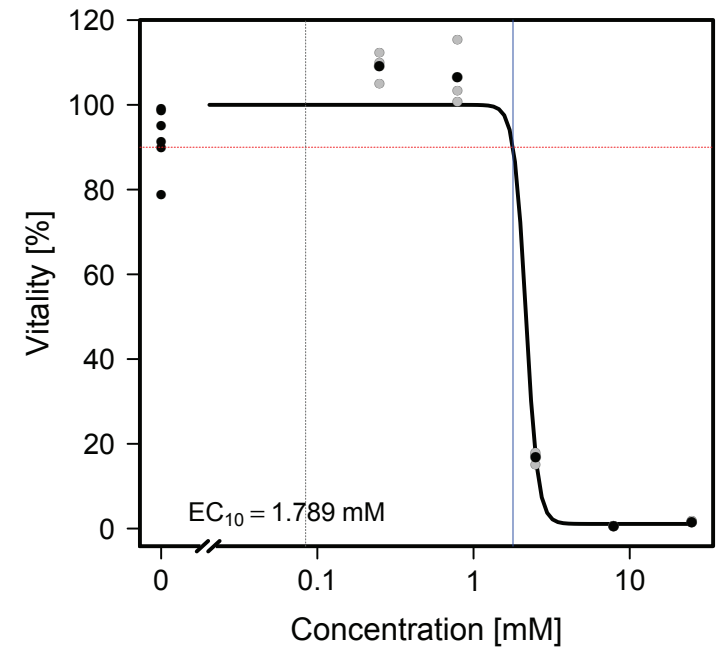

Supplement: MOESM12 [file 204_2019_2492_MOESM12_ESM.pdf › 204_2019_2492_MOESM12_ESM.pdf]
