# Supplementary figures and images for: Prediction of human drug-induced liver injury (DILI) in relation to oral doses and blood concentrations
Source: Springer Nature journal article supplement (doi:10.1007/s00204-019-02492-9), 2019-06-01

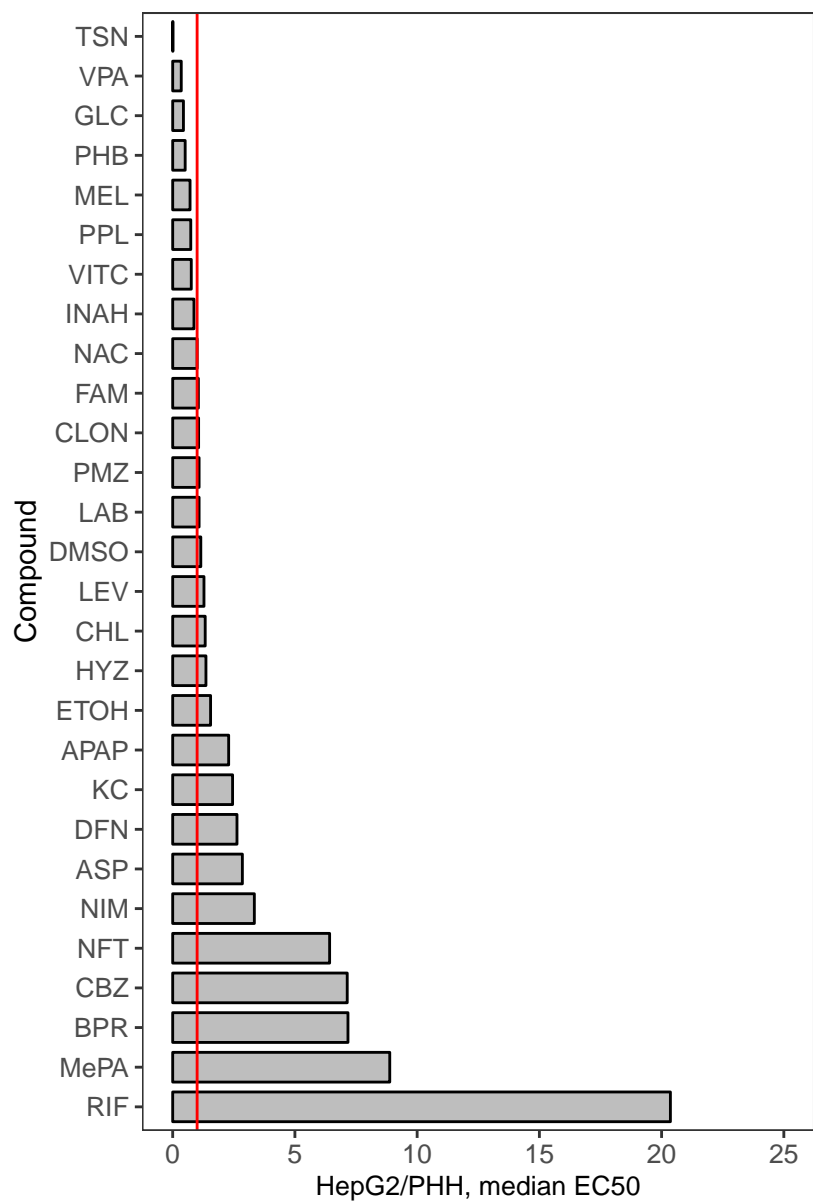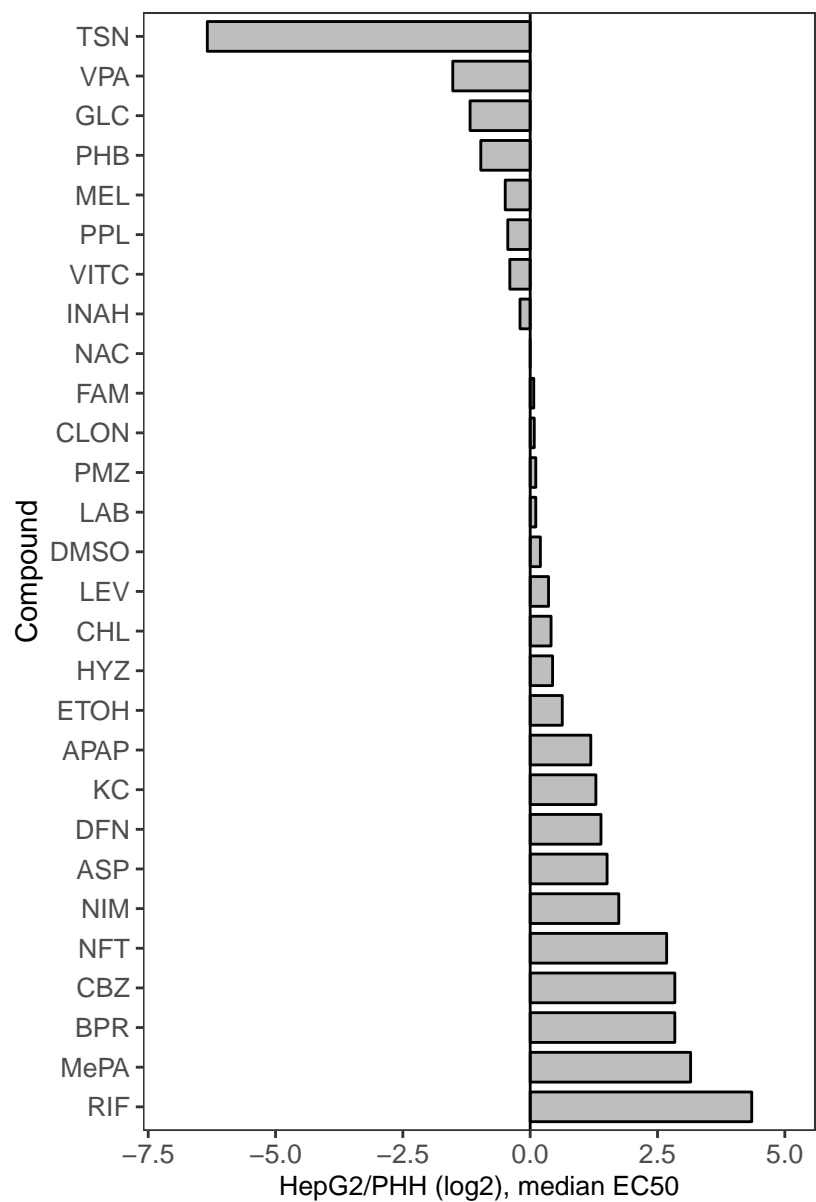

Supplement: MOESM10 [file 204_2019_2492_MOESM10_ESM.pdf › 204_2019_2492_MOESM10_ESM.pdf]

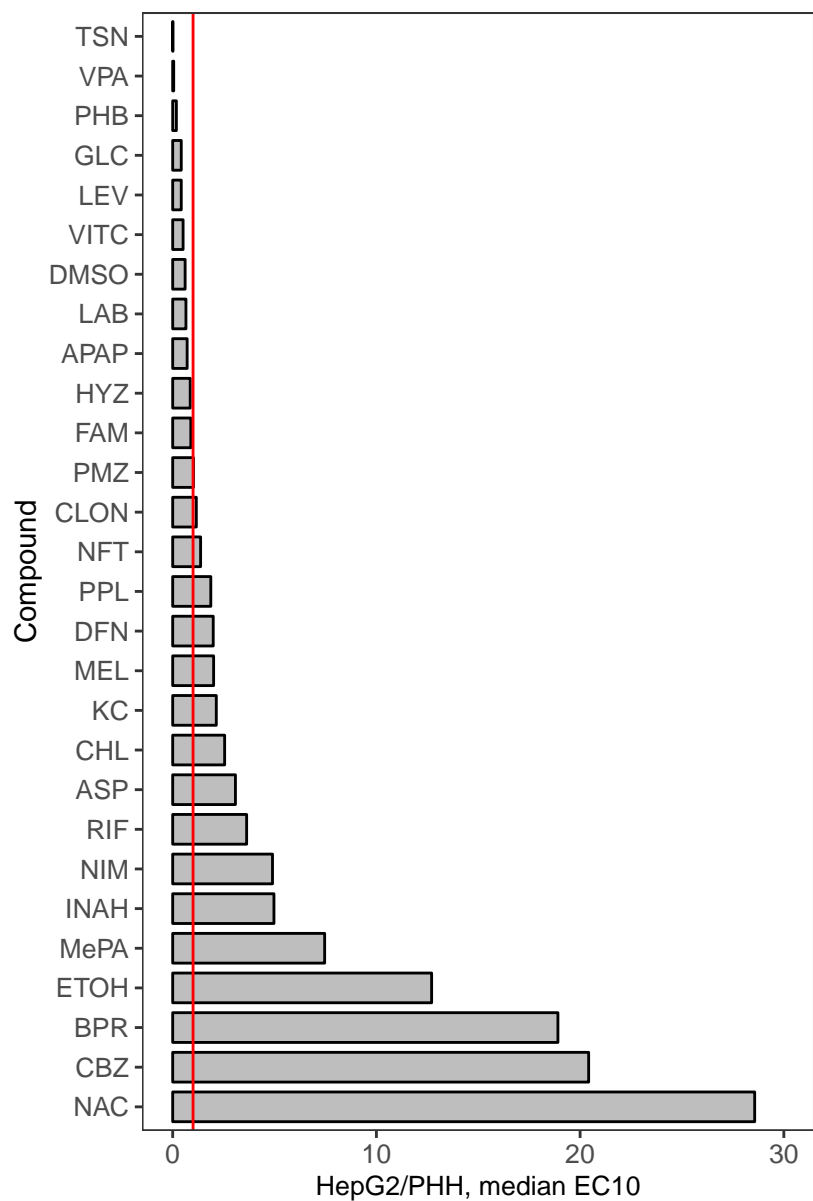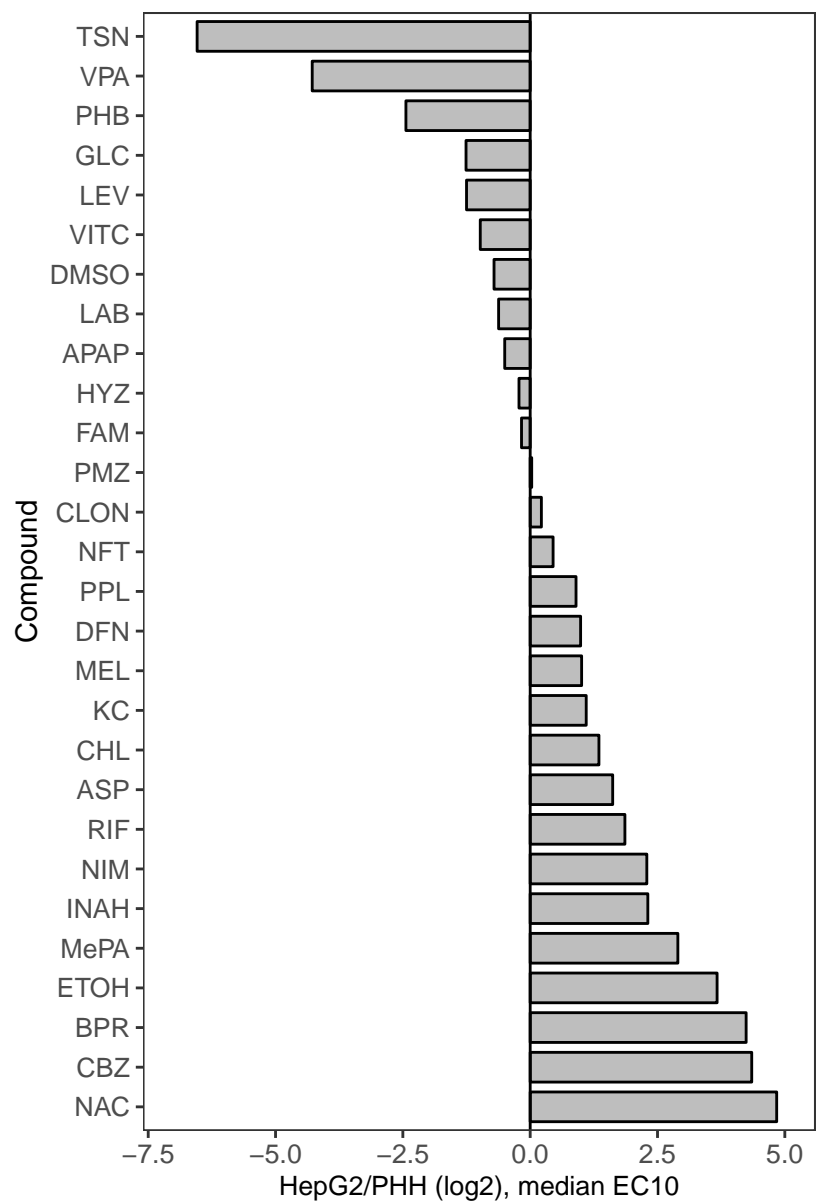

Supplement: MOESM9 [file 204_2019_2492_MOESM9_ESM.pdf › 204_2019_2492_MOESM9_ESM.pdf]
